# Supplementary material for: Interdependency of regulatory effects of iron and riboflavin in the foodborne pathogen Shigella flexneri determined by integral transcriptomics
Source: PeerJ. 2020 Sep 15;8:e9553. doi: 10.7717/peerj.9553 (PMC7500357; doi:10.7717/peerj.9553)
Supplement: Supplemental Information 2 [file peerj-08-9553-s002.xlsx]

## Sheet: Comparisons
T media minus iron vs. T media plus Iron (comparison α)						T media minus iron vs. T media plus Riboflavin (comparison β)						T medium minus iron plus Riboflavin vs. T medium plus Riboflavin plus Iron (Comparison γ)								T media plus Iron vs. T media plus Riboflavin plus Iron (Comparison δ)
Total Genes	292						178						2205								100
GeneID	GeneName	Log2 Fold change	P-value	Annotation		GeneID	GeneName	Log2 Fold change	P-value	Annotation		GeneID	GeneName	Log2 Fold change	P-value	Annotation				GeneID	GeneName	Log2 Fold change	P-value	Annotation
AAP17390.1	cds1839	6.40215	1.2959e-110	hypothetical protein		AAP18621.1	yjbO	1.36628	2.78658e-09	hypothetical protein		AAP17390.1	cds1839	8.31857	0	hypothetical protein				AAP17390.1	cds1839	0.66064	4.49051e-06	hypothetical protein
AAP17248.1	yebL	3.37353	4.95271e-42	putative adhesin		AAP18285.1	cds2737	1.31117	1.16245e-06	hypothetical protein		AAP17248.1	yebL	4.41197	2.92929e-166	putative adhesin				AAP16019.1	fes	0.648123	3.07517e-05	enterochelin esterase
AAP17666.1	cds2118	2.6708	4.24207e-28	putative sugar transferase		AAP16622.1	ycfR	1.28029	2.14796e-08	hypothetical protein		AAP18856.1	metE	4.06819	2.27478e-146	tetrahydropteroyltriglutamate methyltransferase				AAP19591.1	fhuF	0.644847	8.15787e-06	hypothetical protein
AAP17665.1	cds2117	2.4287	4.79894e-24	putative enzyme		AAP17259.1	ipaH_4	1.22675	9.67265e-08	invasion plasmid antigen		AAP17249.1	yebM	3.2557	5.21623e-101	putative ATP-binding component of a transport system				AAP19516.1	cds3966	0.621224	0.0135461	IS1 orfA
AAP17249.1	yebM	2.26968	1.19796e-21	putative ATP-binding component of a transport system		AAP17570.1	cds2023	1.21947	1.23158e-07	putative oxidoreductase		AAP18911.1	ilvC	2.9712	5.06859e-87	ketol-acid reductoisomerase				AAP17388.1	cds1837	0.590406	0.000124294	hypothetical protein
AAP17667.1	ybfG	2.17478	1.00726e-19	putative transformylase		YP_001449236.1	ospE2	1.18363	2.74738e-07	OspE2		AAP18910.1	ppiC	2.91749	5.14726e-83	peptidyl-prolyl cis-trans isomerase C (rotamase C)				AAP16382.1	cds834	0.590174	0.000418662	IS2 orfA
AAP17250.1	yebI	2.07385	1.53146e-18	hypothetical protein		AAP16393.1	ybhH	1.17708	5.93532e-06	hypothetical protein		AAP17250.1	yebI	2.8343	1.80274e-79	hypothetical protein				AAP19590.1	bglJ	0.576226	0.000102158	2-component transcriptional regulator
AAP17664.1	ais	2.04875	1.14455e-16	protein induced by aluminum		AAP16805.1	pspD	1.14519	5.30505e-07	phage shock protein		AAP17247.1	yebA	2.82253	1.16397e-79	hypothetical protein				AAP17249.1	yebM	0.569256	7.72895e-05	putative ATP-binding component of a transport system
AAP17247.1	yebA	2.03242	5.60627e-18	hypothetical protein		AAP16804.1	pspC	1.13809	5.75e-07	putative regulator of phage shock response		AAP19442.1	cds3892	2.79495	2.1343e-33	IS1 orfA				AAP17248.1	yebL	0.553999	0.000116838	putative adhesin
AAP17152.1	sodB	1.79492	1.50156e-14	superoxide dismutase		AAP18217.1	cds2669	1.13306	0.000173059	putative DNA-binding protein		AAP18736.1	argB	2.76784	8.51045e-75	acetylglutamate kinase				AAP16026.1	ybdA	0.553065	0.000177834	hypothetical membrane protein P43
AAP18665.1	yjdB	1.79165	4.72082e-14	hypothetical protein		AAP18408.1	ygjN	1.12226	1.03947e-06	hypothetical protein		AAP16502.1	cspH	2.69454	1.05425e-63	cold shock-like protein				AAP18788.1	frvA	0.552457	0.0205575	PTS system%2C fructose-specific IIA component
AAP16502.1	cspH	1.71714	2.80635e-13	cold shock-like protein		NP_858183.2	cds4097	1.10033	1.5115e-06	IS1 encoded protein		AAP16321.1	artQ	2.61236	6.50645e-68	arginine 3rd transport system permease protein				AAP19358.1	yheA	0.517197	0.000350378	hypothetical protein
AAP15928.1	glnK	1.57459	1.69985e-09	nitrogen regulatory protein P-II 2		AAP17185.1	cds1634	1.09265	5.88626e-05	putative amino acid/amine transport protein		AAP16320.1	artM	2.55714	8.69895e-66	arginine 3rd transport system permease protein				AAP18779.1	cds3230	0.514313	0.022756	IS2 orfB
AAP18856.1	metE	1.53599	3.28535e-11	tetrahydropteroyltriglutamate methyltransferase		AAP16803.1	pspB	1.08083	2.02167e-06	phage shock protein		AAP18093.1	cysI	2.51661	4.29037e-65	sulfite reductase%2C alpha subunit				AAP19359.1	bfr	0.511975	0.00039017	bacterioferrin
AAP16505.1	cspG	1.53184	9.53983e-11	putative cold shock protein		AAP18060.1	hycA	1.07504	0.000777709	formate hydrogenlyase regulatory protein		AAP19441.1	argI	2.50953	1.21934e-63	ornithine carbamoyltransferase 1				AAP18746.1	frwC	0.508553	0.0167619	PTS system%2C fructose-like enzyme II component
AAP18910.1	ppiC	1.47184	2.07663e-10	peptidyl-prolyl cis-trans isomerase C (rotamase C)		AAP17747.1	cds2199	1.07391	3.33515e-06	hypothetical protein		AAP16322.1	artI	2.48575	1.35638e-62	arginine 3rd transport system periplasmic binding protein				AAP19259.1	yhhX	0.504927	0.000486174	putative regulator
AAP17332.1	ftn	1.44739	4.41302e-10	cytoplasmic ferritin		AAP19562.1	cds4012	1.0676	0.000146449	hypothetical protein		AAP18493.1	argG	2.37196	2.50549e-58	argininosuccinate synthetase				AAP16363.1	cds814	0.504641	0.0321697	ISSfl3 orfA
AAP18911.1	ilvC	1.358	3.81638e-09	ketol-acid reductoisomerase		AAP15991.1	sfmA	1.06424	3.30065e-05	putative fimbrial-like protein		AAP18748.1	metF	2.37029	2.54197e-58	5%2C10-methylene-tetrahydrofolate reductase				AAP17250.1	yebI	0.504254	0.00046649	hypothetical protein
AAP19531.1	yjeT	1.29	1.27003e-06	hypothetical protein		AAP16815.1	ycjV	1.05832	0.000223724	putative ATP-binding component of a transport system		AAP17689.1	nuoH	2.29438	3.8228e-55	NADH dehydrogenase I chain H				AAP15962.1	ybaS	0.503872	0.0125129	putative glutaminase
AAP16320.1	artM	1.25722	4.91785e-08	arginine 3rd transport system permease protein		AAP15857.1	cds308	1.0394	0.00065192	IS629%2C orfA		AAP16319.1	artJ	2.291	1.77226e-53	arginine 3rd transport system periplasmic binding protein				AAP16027.1	fepB	0.499684	0.000600288	ferric enterobactin (enterochelin) binding protein
AAP19160.1	dppC	1.18241	2.67032e-07	dipeptide transport system permease protein 2		AAP16707.1	ychH	1.03679	5.51823e-06	hypothetical protein		AAP19160.1	dppC	2.27824	2.68663e-54	dipeptide transport system permease protein 2				AAP16902.1	cds1353	0.496202	0.00530102	IS1 orfB
AAP17795.1	cysM	1.16601	3.82117e-07	cysteine synthase B%2C O-acetylserine sulfhydrolase B		AAP17812.1	cds2264	1.0113	2.82335e-05	hypothetical protein		AAP17688.1	nuoI	2.27624	5.77976e-54	NADH dehydrogenase I chain I				AAP16018.1	fepA	0.492409	0.000851694	ferrienterobactin receptor precursor
AAP16504.1	cds956	1.16148	1.2293e-06	IS1 orfB		NP_858136.1	ospB	1.00727	8.96516e-06	OspB protein		AAP18735.1	argH	2.27344	4.75737e-54	argininosuccinate lyase				AAP19588.1	cds4038	0.484683	0.0431371	IS1 orfA
AAP18093.1	cysI	1.15514	4.80861e-07	sulfite reductase%2C alpha subunit		AAP16068.1	cds519	0.998893	1.1744e-05	putative homeobox protein		AAP19159.1	dppB	2.26449	6.27359e-54	dipeptide transport system permease protein 1				AAP18281.1	cds2733	0.481707	0.00223426	IS2 orfA
AAP17686.1	nuoK	1.14326	6.81339e-07	NADH dehydrogenase I chain K		AAP17875.1	cds2327	0.989231	1.27499e-05	putative stabilization protein		AAP17152.1	sodB	2.25586	1.51407e-53	superoxide dismutase				AAP17818.1	cds2270	0.478503	0.0164804	hypothetical protein
AAP18909.1	rep	1.13224	8.34992e-07	rep helicase		AAP17258.1	cds1707	0.980018	1.80441e-05	hypothetical bacteriophage protein		AAP18092.1	cysH	2.23953	1.03229e-52	3-phosphoadenosine 5-phosphosulfate reductase				AAP19030.1	iutA	0.475448	0.000961462	putative ferric siderophore receptor
AAP17904.1	suhB	1.10812	1.40494e-06	Inositol-1-monophosphatase		AAP16802.1	pspA	0.979684	1.50882e-05	phage shock protein%2C inner membrane protein		AAP17795.1	cysM	2.23607	1.17863e-52	cysteine synthase B%2C O-acetylserine sulfhydrolase B				AAP17270.1	cds1719	0.468785	0.0128048	IS629 orfB
AAP17689.1	nuoH	1.0942	1.82207e-06	NADH dehydrogenase I chain H		YP_001449237.1	ospE1	0.966523	2.45386e-05	OspE1		AAP17666.1	cds2118	2.23126	8.43541e-50	putative sugar transferase				AAP18023.1	nrdE	0.465396	0.00126494	ribonucleoside-diphosphate reductase 2%2C alpha subunit
AAP17688.1	nuoI	1.09174	1.96617e-06	NADH dehydrogenase I chain I		AAP19110.1	yibI	0.941668	0.0027361	hypothetical protein		AAP17713.1	hisP	2.2256	1.27755e-50	ATP-binding component of histidine transport				AAP17274.1	sitA	0.463583	0.00126536	Iron transport protein
AAP18094.1	cysJ	1.08777	2.07084e-06	sulfite reductase (NADPH)%2C flavoprotein beta subunit		NP_858359.2	ipaH9	0.938244	3.39433e-05	invasion plasmid antigen%2C secreted by the Mxi-Spa secretion machinery		AAP17686.1	nuoK	2.20466	2.79619e-50	NADH dehydrogenase I chain K				AAP16674.1	cds1125	0.460857	0.00228501	IS3 orfB
AAP18092.1	cysH	1.07261	2.88833e-06	3-phosphoadenosine 5-phosphosulfate reductase		AAP19015.1	yieC	0.935788	5.4102e-05	putative receptor protein		AAP17687.1	nuoJ	2.18606	2.78404e-50	NADH dehydrogenase I chain J				AAP15974.1	ybbT	0.460444	0.0466061	hypothetical protein
AAP19159.1	dppB	1.06254	3.51705e-06	dipeptide transport system permease protein 1		AAP17873.1	trbL	0.9281	4.39851e-05	putative mating pair formation protein		AAP17684.1	nuoM	2.1809	7.71434e-50	NADH dehydrogenase I chain M				AAP18340.1	exbD	0.450116	0.00181227	enterochelin transporter (uptake)
AAP17687.1	nuoJ	1.05203	4.47386e-06	NADH dehydrogenase I chain J		AAP16806.1	pspE	0.924009	4.68126e-05	phage shock protein		AAP18737.1	argC	2.16555	1.46313e-48	N-acetyl-gamma-glutamylphosphate reductase				AAP18022.1	nrdI	0.449839	0.00220711	hypothetical protein
AAP19146.1	cds3597	1.04603	2.06249e-05	IS150 putative transposase		AAP17874.1	trbJ	0.907228	6.0872e-05	putative mating pair formation protein		AAP15577.1	carB	2.14712	3.07856e-49	carbamoyl-phosphate synthase large subunit				AAP15686.1	fhuA	0.448513	0.00183317	outer membrane protein receptor for ferrichrome%2C colicin M%2C and phages T1%2C T5%2C and phi80
AAP17684.1	nuoM	1.03659	6.17841e-06	NADH dehydrogenase I chain M		AAP17794.1	yfeK	0.883467	0.000109696	hypothetical protein		AAP17685.1	nuoL	2.12116	4.99228e-48	NADH dehydrogenase I chain L				AAP18974.1	yidL	0.448341	0.00827929	putative ARAC-type regulatory protein
AAP18735.1	argH	1.02419	7.75953e-06	argininosuccinate lyase		AAP17301.1	yecK	0.881478	0.000127548	putative cytochrome C-type protein		AAP16138.1	ybeK	2.10743	8.34329e-46	putative tRNA synthetase				AAP17325.1	cds1774	0.445029	0.048515	IS1 orfB
AAP15577.1	carB	1.02051	8.1825e-06	carbamoyl-phosphate synthase large subunit		AAP16252.1	ybhP	0.879805	0.000174813	hypothetical protein		AAP18945.1	atpD	2.09246	4.45306e-47	membrane-bound ATP synthase%2C F1 sector%2C beta-subunit				AAP19291.1	feoA	0.444304	0.00214951	ferrous iron transport protein A
AAP16321.1	artQ	1.01978	8.82918e-06	arginine 3rd transport system permease protein		AAP16576.1	dinI	0.874036	0.000116098	damage-inducible protein I		AAP18094.1	cysJ	2.08563	1.1345e-46	sulfite reductase (NADPH)%2C flavoprotein beta subunit				AAP16474.1	cds926	0.444122	0.0133383	IS2 orfA
AAP15832.1	gpt	1.01361	1.04436e-05	guanine-hypoxanthine phosphoribosyltransferase		AAP16326.1	cds777	0.867772	0.000528245	hypothetical protein		AAP17714.1	hisM	2.07639	6.43511e-45	histidine transport%2C membrane protein M				AAP16025.1	fepD	0.442731	0.00312862	ferric enterobactin (enterochelin) transport protein
AAP17685.1	nuoL	1.01283	9.6342e-06	NADH dehydrogenase I chain L		AAP17368.1	fliR	0.866461	0.000172438	flagellar biosynthetic protein FliR		AAP19161.1	dppD	2.07137	5.62236e-46	putative ATP-binding component of dipeptide transport system				AAP15688.1	fhuD	0.44154	0.00247024	ferrichrome-iron transport protein FhuD
AAP18736.1	argB	1.01245	1.02398e-05	acetylglutamate kinase		AAP17813.1	cds2265	0.866355	0.000572682	hypothetical protein		AAP16504.1	cds956	2.05655	1.26329e-30	IS1 orfB				AAP16413.1	cds865	0.435939	0.013525	IS600 orfA
AAP19161.1	dppD	1.01162	9.90135e-06	putative ATP-binding component of dipeptide transport system		AAP17377.1	cds1826	0.866092	0.000343871	ISEhe3 orfB		AAP16744.1	oppC	2.05585	4.1962e-45	oligopeptide transport permease protein				AAP19033.1	iucB	0.435779	0.00249651	siderophore biosynthesis protein
AAP18377.1	cds2829	0.986009	0.00184337	IS1 orfB		AAP15992.1	sfmC	0.860375	0.000186771	putative chaperone		AAP16982.1	cds1433	2.04893	5.29178e-34	IS1 orfA				AAP18814.1	yihR	0.429895	0.0293948	putative aldose-1-epimerase
AAP17797.1	cysW	0.982956	1.76926e-05	sulfate transport system permease W protein		NP_858330.2	cds4241	0.845335	0.000502979	hypothetical protein		AAP19337.1	argD	2.00558	9.49916e-42	acetylornithine delta-aminotransferase				AAP18024.1	nrdF	0.429109	0.00322037	ribonucleoside-diphosphate reductase 2%2C beta chain
AAP16103.1	ybgH	0.979881	2.25364e-05	putative transport protein		AAP16665.1	cds1116	0.841232	0.000218933	hypothetical protein		AAP17683.1	nuoN	1.99007	8.94784e-43	NADH dehydrogenase I chain N				AAP16210.1	cds661	0.4291	0.0480379	IS600 orfB
AAP19162.1	dppF	0.971914	2.1484e-05	putative ATP-binding component of dipeptide transport system		AAP18443.1	tdcA	0.84018	0.00157783	transcriptional activator of tdc operon		AAP16934.1	yeaF	1.98484	1.15523e-42	hypothetical protein				AAP16393.1	ybhH	0.426436	0.0653686	hypothetical protein
AAP18753.1	rpmE	0.971363	2.15547e-05	50S ribosomal subunit protein L31		AAP16541.1	csgD	0.834909	0.000318315	probable csgAB operon transcriptional regulatory protein		AAP17690.1	nuoG	1.95888	8.11144e-42	NADH dehydrogenase I chain G				AAP17389.1	cds1838	0.426136	0.00456301	hypothetical protein
AAP16259.1	rhlE	0.969516	2.30628e-05	putative ATP-dependent RNA helicase		AAP18814.1	yihR	0.831585	0.000563655	putative aldose-1-epimerase		AAP17665.1	cds2117	1.95484	3.6838e-40	putative enzyme				AAP18160.1	lysA	0.425862	0.00312066	diaminopimelate decarboxylase
AAP17761.1	cds2213	0.964735	2.92672e-05	putative enzyme		AAP18719.1	tufB	-0.83147	0.000231744	protein chain elongation factor EF-Tu		AAP19162.1	dppF	1.93445	1.17148e-40	putative ATP-binding component of dipeptide transport system				AAP18745.1	frwB	0.424965	0.0571869	PTS system fructose-like IIB component 1
AAP16322.1	artI	0.963997	2.57303e-05	arginine 3rd transport system periplasmic binding protein		AAP18898.1	rffH	-0.832127	0.000263437	glucose-1-phosphate thymidylyltransferase		AAP19147.1	cspA	1.92288	1.62383e-40	cold shock protein 7.4%2C transcriptional activator of hns				AAP17531.1	metG	0.422864	0.0912845	methionine tRNA synthetase
AAP17009.1	ppsA	0.963891	2.46606e-05	phosphoenolpyruvate synthase		AAP18944.1	atpG	-0.836398	0.000211802	membrane-bound ATP synthase%2C F1 sector%2C gamma-subunit		AAP17692.1	nuoE	1.89962	3.15885e-39	NADH dehydrogenase I chain E				AAP18339.1	cds2791	0.422204	0.00356313	hypothetical protein
AAP17720.1	cvpA	0.963864	2.55089e-05	membrane protein		AAP19262.1	gntK	-0.837522	0.000380075	gluconokinase 2		AAP17009.1	ppsA	1.88709	3.92937e-39	phosphoenolpyruvate synthase				AAP18021.1	nrdH	0.420117	0.00520905	glutaredoxin-like protein
AAP17760.1	cds2212	0.963089	2.94445e-05	putative enzyme		AAP17798.1	cysU	-0.838303	0.000211644	sulfate%2C thiosulfate transport system permease T protein		AAP16503.1	cds955	1.88622	1.71593e-38	IS1 orfA				AAP17134.1	cds1585	0.417547	0.00584759	IS2 orfA
AAP18740.1	yijP	0.963003	2.5717e-05	hypothetical protein		AAP17806.1	cds2258	-0.83959	0.000263516	hypothetical protein		AAP17105.1	fumA	1.88564	1.04193e-38	fumarase A%2C fumarate hydratase Class I%3B aerobic isozyme				AAP17630.1	yojI	0.415913	0.00423839	putative ATP-binding component of a transport system
AAP17668.1	cds2120	0.955327	8.18117e-05	hypothetical protein		AAP19071.1	mutM	-0.844189	0.000269479	formamidopyrimidine DNA glycosylase		AAP19577.1	hpaE	1.83373	7.4023e-31	5-carboxy-2-hydroxymuconate semialdehyde dehydrogenase				AAP19034.1	iucA	0.413019	0.00410954	siderophore biosynthesis protein
AAP17690.1	nuoG	0.95396	2.98312e-05	NADH dehydrogenase I chain G		AAP15729.1	rcsF	-0.851619	0.000219801	exopolysaccharide synthesis regulator		AAP16745.1	oppD	1.80544	7.71556e-36	ATP-binding protein of oligopeptide ABC transport system				AAP17247.1	yebA	0.412061	0.00411782	hypothetical protein
AAP17714.1	hisM	0.952767	3.24218e-05	histidine transport%2C membrane protein M		AAP18750.1	metB	-0.852014	0.000166637	cystathionine gamma-synthase		AAP18087.1	ygbE	1.80076	4.44709e-35	putative cytochrome oxidase subunit				AAP17360.1	fliH	0.409936	0.0427934	flagellar assembly protein FliH
AAP16744.1	oppC	0.952571	3.13629e-05	oligopeptide transport permease protein		AAP17734.1	yfcA	-0.852531	0.000167704	putative structural protein		AAP17720.1	cvpA	1.77951	1.05194e-34	membrane protein				AAP17080.1	cds1531	0.407345	0.0923107	IS911 orfA
AAP17683.1	nuoN	0.946366	3.49276e-05	NADH dehydrogenase I chain N		AAP18692.1	metA	-0.852593	0.000162315	homoserine transsuccinylase		AAP17693.1	nuoC	1.77471	5.27964e-35	NADH dehydrogenase I chain C%2C D				AAP18321.1	yghS	0.405583	0.012523	hypothetical protein
AAP18994.1	rnpA	0.942793	3.7317e-05	RNase P%2C protein component%3B protein C5		AAP17378.1	cds1827	-0.859139	0.00118667	ISEhe3 orfA		AAP18141.1	argA	1.77025	1.0162e-34	N-acetylglutamate synthase%3B amino acid acetyltransferase				AAP19032.1	iucC	0.403296	0.00504893	siderophore biosynthesis protein
AAP17713.1	hisP	0.942456	3.9596e-05	ATP-binding component of histidine transport		AAP19299.1	yrfH	-0.861755	0.00015603	hypothetical protein		AAP19249.1	livM	1.75623	3.77149e-34	high-affinity branched-chain amino acid transport protein%2C membrane component				AAP18341.1	exbB	0.399169	0.00555088	enterochelin transporter (uptake)
AAP17798.1	cysU	0.932632	4.51724e-05	sulfate%2C thiosulfate transport system permease T protein		AAP17720.1	cvpA	-0.875093	0.000115733	membrane protein		AAP17691.1	nuoF	1.75088	5.42889e-34	NADH dehydrogenase I chain F				AAP19290.1	feoB	0.397274	0.00570676	ferrous iron transport protein B
AAP18737.1	argC	0.91767	6.1945e-05	N-acetyl-gamma-glutamylphosphate reductase		AAP15572.1	slpA	-0.880082	0.000112221	probable FKBX-type 16kD peptidyl-prolyl cis-trans isomerase (a rotamase)		AAP17351.1	yedE	1.71584	3.05193e-32	putative transport system permease protein				AAP17487.1	cds1936	0.397	0.085273	IS1 orfB
AAP18088.1	cysC	0.917052	6.13952e-05	adenosine 5-phosphosulfate kinase		AAP16765.1	trpE	-0.882486	9.71934e-05	anthranilate synthase component I		AAP18562.1	mreD	1.71232	1.14791e-31	rod shape-determining protein				AAP18579.1	cds3030	0.395765	0.0586243	IS1 orfB
AAP17691.1	nuoF	0.915207	6.20797e-05	NADH dehydrogenase I chain F		AAP17691.1	nuoF	-0.882986	9.61401e-05	NADH dehydrogenase I chain F		AAP19298.1	yrfI	1.704	5.04969e-32	hypothetical protein				AAP15687.1	fhuC	0.387364	0.00773091	ATP-binding component of hydroxymate-dependent iron transport
AAP16982.1	cds1433	0.910996	0.000123004	IS1 orfA		AAP16203.1	cds654	-0.886943	0.000294048	putative bacteriophage protein		AAP16103.1	ybgH	1.69838	7.21666e-30	putative transport protein				AAP17507.1	cds1956	0.381733	0.0149073	hypothetical protein
AAP16417.1	ycaO	0.897596	8.6619e-05	hypothetical protein		AAP15847.1	gtrII	-0.892246	8.36503e-05	putative glucosyl tranferase II		AAP17798.1	cysU	1.68793	8.44225e-32	sulfate%2C thiosulfate transport system permease T protein				AAP17067.1	cds1518	0.38165	0.0534414	ISEhe3 orfB
AAP17627.1	napD	0.877292	0.000913971	hypothetical protein		AAP18916.1	ilvM	-0.893786	8.15053e-05	acetolactate synthase II%2C small subunit		AAP18088.1	cysC	1.66577	8.03188e-31	adenosine 5-phosphosulfate kinase				AAP17411.1	cds1860	-0.381653	0.101877	hypothetical protein
AAP17692.1	nuoE	0.870557	0.000138581	NADH dehydrogenase I chain E		AAP15855.1	cds306	-0.89475	0.00384859	IS600 orfB		AAP16323.1	artP	1.66037	1.72256e-30	ATP-binding component of 3rd arginine transport system				AAP16095.1	ybgD	-0.38787	0.0239092	putative fimbrial-like protein
AAP16294.1	yliG	0.868848	0.000144359	hypothetical protein		AAP17424.1	cobS	-0.898113	0.000102693	cobalamin 5-phosphate synthase		AAP15573.1	lytB	1.65641	2.44088e-30	LytB protein				NP_858403.1	cds4310	-0.392274	0.00779332	IS3 ORF2
AAP15877.1	queA	0.859111	0.000169711	probable S-adenosylmethionine:tRNA ribosyltransferase-isomerase		AAP16063.1	galT	-0.899627	7.6902e-05	galactose-1-phosphate uridylyltransferase		AAP16714.1	hemK	1.65386	1.63817e-29	possible protoporphyrinogen oxidase				AAP15568.1	cds20	-0.394731	0.00716923	hypothetical protein
AAP17153.1	cds1602	0.857977	0.000194692	putative transport protein		AAP18966.1	ilvB	-0.900561	6.84228e-05	acetolactate synthase I%2C valine-sensitive%2C large subunit		AAP15803.1	ykgG	1.64798	1.92007e-26	putative transporter				NP_858213.1	cds4127	-0.398417	0.117167	IS629 ORF1
AAP17105.1	fumA	0.855827	0.000178313	fumarase A%2C fumarate hydratase Class I%3B aerobic isozyme		AAP15549.1	thrA	-0.916774	4.98582e-05	aspartokinase I%2C homoserine dehydrogenase I		AAP15551.1	thrC	1.64565	1.40657e-30	threonine synthase				AAP15746.1	safB	-0.399532	0.0548358	periplasmic chaperone of fimbral assembly machinery
AAP18350.1	cds2802	0.851938	0.000199644	hypothetical protein		AAP18915.1	ilvE	-0.917028	5.04994e-05	branched-chain amino-acid aminotransferase		AAP16746.1	oppF	1.63985	3.6066e-30	ATP-binding protein of oligopeptide ABC transport system				AAP18443.1	tdcA	-0.40784	0.0979108	transcriptional activator of tdc operon
AAP18562.1	mreD	0.851414	0.000204536	rod shape-determining protein		AAP19083.1	waaI	-0.918049	5.39554e-05	lipid A-core%2C surface polymer ligase		AAP17715.1	hisQ	1.628	1.30891e-29	histidine transport system permease protein				AAP18463.1	cds2914	-0.410625	0.0589856	IS1 orfA
AAP18493.1	argG	0.850227	0.000195888	argininosuccinate synthetase		AAP18027.1	proX	-0.918338	5.03761e-05	glycine betaine/L-proline transport system permease protein		AAP17761.1	cds2213	1.62357	3.28256e-28	putative enzyme				AAP17410.1	cds1859	-0.412544	0.0296193	hypothetical bacteriophage protein
AAP16714.1	hemK	0.846386	0.000224042	possible protoporphyrinogen oxidase		AAP18946.1	atpC	-0.919192	4.85573e-05	membrane-bound ATP synthase%2C F1 sector%2C epsilon-subunit		AAP16743.1	oppB	1.61686	2.82686e-29	oligopeptide transport permease protein				AAP18933.1	asnA	-0.426672	0.00316562	asparagine synthetase A
AAP19441.1	argI	0.845629	0.000216069	ornithine carbamoyltransferase 1		AAP16084.1	farR	-0.920444	4.90894e-05	transcriptional regulator of succinyl CoA synthetase operon		AAP16505.1	cspG	1.61372	8.40767e-24	putative cold shock protein				AAP17668.1	cds2120	-0.432161	0.00739854	hypothetical protein
AAP16934.1	yeaF	0.841022	0.000227859	hypothetical protein		AAP17152.1	sodB	-0.922134	4.70538e-05	superoxide dismutase		AAP17904.1	suhB	1.5792	6.30323e-28	Inositol-1-monophosphatase				AAP18100.1	ygcS	-0.43236	0.0331969	putative transport protein
AAP15881.1	secF	0.840234	0.000234094	membrane protein		AAP17428.1	is629b	-0.928364	0.00345788	IS629 orfB		AAP17797.1	cysW	1.57694	5.17451e-28	sulfate transport system permease W protein				AAP16646.1	cds1097	-0.437233	0.0878578	putative head maturation protease of prophage CP-933C
AAP19568.1	yjiY	0.839957	0.000241101	putative carbon starvation protein		AAP19380.1	rplO	-0.929889	3.90837e-05	50S ribosomal subunit protein L15		AAP18585.1	aroE	1.57072	1.97792e-27	dehydroshikimate reductase				AAP19391.1	cds3842	-0.441402	0.0264389	ISSfl3 orfD
AAP17852.1	uraA	0.836913	0.000297662	uracil transport protein		AAP18562.1	mreD	-0.932605	4.5478e-05	rod shape-determining protein		AAP19578.1	hpaG	1.56706	1.42358e-22	5-oxo-1%2C2%2C5-tricarboxilic-3-penten acid decarboxilase/isomerase				AAP17405.1	cds1854	-0.443064	0.0170818	putative Q antiterminator of prophage
AAP18993.1	rpmH	0.833796	0.000259081	50S ribosomal subunit protein L34		AAP16091.1	sdhA	-0.934192	3.61444e-05	succinate dehydrogenase%2C flavoprotein subunit		AAP19500.1	mopB	1.56082	8.9349e-28	GroES%2C 10 Kd chaperone				AAP18253.1	cds2705	-0.449742	0.0285213	hypothetical protein
AAP19554.1	rpsF	0.8331	0.000258513	30S ribosomal subunit protein S6		AAP18757.1	hslV	-0.944957	3.17126e-05	heat shock protein HslVU%2C proteasome-related peptidase subunit		AAP17352.1	yedF	1.55807	5.35489e-25	hypothetical protein				AAP18391.1	ttdB	-0.454914	0.0206604	L-tartrate dehydratase%2C subunit B
AAP15573.1	lytB	0.82947	0.000284167	LytB protein		AAP16746.1	oppF	-0.951622	2.70203e-05	ATP-binding protein of oligopeptide ABC transport system		AAP18740.1	yijP	1.55389	2.35216e-27	hypothetical protein				AAP17152.1	sodB	-0.463623	0.00126606	superoxide dismutase
AAP15572.1	slpA	0.828361	0.000294914	probable FKBX-type 16kD peptidyl-prolyl cis-trans isomerase (a rotamase)		AAP15630.1	mraY	-0.95231	2.74434e-05	phospho-N-acetylmuramoyl-pentapeptide transferase		AAP18946.1	atpC	1.55236	1.80491e-27	membrane-bound ATP synthase%2C F1 sector%2C epsilon-subunit				AAP16502.1	cspH	-0.471377	0.00129012	cold shock-like protein
AAP19556.1	rpsR	0.827397	0.000285274	30S ribosomal subunit protein S18		AAP17351.1	yedE	-0.953851	2.81816e-05	putative transport system permease protein		AAP16417.1	ycaO	1.54835	4.52063e-27	hypothetical protein				AAP17362.1	fliK	-0.485504	0.00809759	flagellar hook-length control protein
AAP17446.1	cds1895	0.826428	0.000475801	IS1 orfB		AAP16764.1	trpD	-0.95395	2.56138e-05	anthranilate synthase component II%2C glutamine amidotransferase and phosphoribosylanthranilate transferase		AAP17667.1	ybfG	1.53509	8.20452e-25	putative transformylase				AAP18619.1	yjbM	-0.490156	0.0419715	hypothetical protein
AAP15664.1	yacK	0.823282	0.000325438	hypothetical protein		AAP15550.1	thrB	-0.955856	2.3946e-05	homoserine kinase		AAP15664.1	yacK	1.53059	3.84458e-26	hypothetical protein				AAP17604.1	yejG	-0.490326	0.000698815	hypothetical protein
AAP19555.1	priB	0.820622	0.000319165	primosomal replication protein N		AAP15804.1	ykgF	-0.956333	3.02941e-05	hypothetical protein		AAP18719.1	tufB	1.52453	1.25408e-26	protein chain elongation factor EF-Tu				AAP19146.1	cds3597	-0.502879	0.00215308	IS150 putative transposase
AAP18089.1	cysN	0.818238	0.000332823	ATP-sulfurylase (ATP:sulfate adenylyltransferase)%2C subunit 1		AAP15622.1	cds74	-0.959659	0.000107281	IS1 orfA		AAP19576.1	hpaD	1.52077	6.40095e-20	homoprotocatechuate dyoxygenase				AAP16504.1	cds956	-0.520767	0.000839475	IS1 orfB
AAP19303.1	mrcA	0.817219	0.000350552	peptidoglycan synthetase%2C penicillin-binding protein 1A		AAP16323.1	artP	-0.959937	2.45799e-05	ATP-binding component of 3rd arginine transport system		AAP18758.1	hslU	1.51715	2.51033e-26	heat shock protein HslVU%2C ATPase subunit				AAP17406.1	cds1855	-0.5313	0.0145854	putative crossover junction endodeoxyribonuclease
AAP15567.1	rpsT	0.817122	0.000340199	30S ribosomal subunit protein S20		AAP16788.1	ycjD	-0.962573	8.07258e-05	hypothetical protein		AAP18914.1	ilvD	1.50668	5.06295e-26	dihydroxyacid dehydratase				AAP15764.1	cds216	-0.549999	0.0304548	putative terminase large subunit
AAP18945.1	atpD	0.815602	0.000346064	membrane-bound ATP synthase%2C F1 sector%2C beta-subunit		AAP18978.1	ibpB	-0.963625	2.80704e-05	heat shock protein		AAP15550.1	thrB	1.50321	5.52124e-26	homoserine kinase				AAP19197.1	cds3648	-0.553864	0.0176498	IS1 orfB
AAP17693.1	nuoC	0.807952	0.000393734	NADH dehydrogenase I chain C%2C D		AAP19501.1	mopA	-0.967147	1.90701e-05	GroEL%2C chaperone Hsp60%2C peptide-dependent ATPase%2C heat shock protein		AAP17664.1	ais	1.50252	1.71458e-20	protein induced by aluminum				AAP18295.1	yeeT	-0.595265	0.00267857	hypothetical protein
AAP18546.1	rplM	0.806347	0.00040307	50S ribosomal subunit protein L13		AAP18885.1	hemD	-0.970546	1.94715e-05	uroporphyrinogen III synthase		AAP19501.1	mopA	1.48949	1.32739e-25	GroEL%2C chaperone Hsp60%2C peptide-dependent ATPase%2C heat shock protein				AAP18283.1	cds2735	-0.607318	0.00563463	hypothetical protein
AAP15951.1	adk	0.805039	0.000418091	adenylate kinase		AAP16085.1	sucD	-0.984044	1.37801e-05	succinyl-CoA synthetase%2C alpha subunit		AAP16634.1	potB	1.48577	1.0029e-24	spermidine/putrescine transport system permease				AAP16505.1	cspG	-0.677114	6.8057e-06	putative cold shock protein
AAP17608.1	rplY	0.802444	0.000434048	50S ribosomal subunit protein L25		AAP16086.1	sucC	-0.985158	1.34615e-05	succinyl-CoA synthetase%2C beta subunit		AAP16315.1	potH	1.48272	9.66155e-23	putrescine transport protein%3B permease				AAP17166.1	cds1615	-0.688015	0.00617636	putative oxidoreductase%2C Fe-S subunit
AAP19249.1	livM	0.802146	0.000437262	high-affinity branched-chain amino acid transport protein%2C membrane component		AAP16937.1	gapA	-0.987769	1.27087e-05	glyceraldehyde-3-phosphate dehydrogenase A		AAP18979.1	ibpA	1.47478	1.69029e-24	heat shock protein				AAP17332.1	ftn	-0.716563	8.26072e-07	cytoplasmic ferritin
NP_858211.1	ipaH7	-0.801365	0.000480242	invasion plasmid antigen		AAP18914.1	ilvD	-0.990635	1.22972e-05	dihydroxyacid dehydratase		AAP18898.1	rffH	1.47262	3.45877e-24	glucose-1-phosphate thymidylyltransferase				AAP15928.1	glnK	-0.734882	3.77853e-05	nitrogen regulatory protein P-II 2
AAP18733.1	cds3184	-0.80227	0.00247053	putative sensor protein		AAP17693.1	nuoC	-0.991688	1.19353e-05	NADH dehydrogenase I chain C%2C D		AAP18947.1	glmU	1.46593	8.91826e-25	N-acetyl glucosamine-1-phosphate uridyltransferase
NP_858273.1	mxiK	-0.806783	0.000399956	Mxi-Spa secretion machinery protein MxiK		AAP18758.1	hslU	-0.99943	1.03667e-05	heat shock protein HslVU%2C ATPase subunit		AAP15951.1	adk	1.46497	1.20803e-24	adenylate kinase
AAP18399.1	ygjG	-0.807325	0.000488172	probable ornithine aminotransferase		AAP18141.1	argA	-1.00208	9.91631e-06	N-acetylglutamate synthase%3B amino acid acetyltransferase		AAP18569.1	accC	1.45896	1.3312e-24	acetyl CoA carboxylase%2C biotin carboxylase subunit
AAP15784.1	cds236	-0.80918	0.000419519	hypothetical protein		AAP16762.1	trpB	-1.00504	9.27331e-06	tryptophan synthase%2C beta protein		AAP19172.1	dctA	1.45814	3.15057e-24	C4-dicarboxylate transport protein
NP_858221.1	cds4135	-0.810028	0.000553743	IS629 ORF1		AAP16763.1	trpC	-1.00849	8.79751e-06	N-(5-phosphoribosyl)anthranilate isomerase and indole-3-glycerolphosphate synthetase		AAP18757.1	hslV	1.45617	3.48317e-24	heat shock protein HslVU%2C proteasome-related peptidase subunit
AAP16673.1	cds1124	-0.811223	0.00649423	IS3 orfA		AAP19500.1	mopB	-1.01246	7.86697e-06	GroES%2C 10 Kd chaperone		AAP15727.1	proS	1.4496	3.09157e-24	proline tRNA synthetase
AAP16902.1	cds1353	-0.811249	0.00111119	IS1 orfB		AAP17715.1	hisQ	-1.01379	8.21864e-06	histidine transport system permease protein		AAP17760.1	cds2212	1.44796	4.51155e-23	putative enzyme
AAP18706.1	thiC	-0.811783	0.000368586	thiamine biosynthesis protein%2C pyrimidine moiety		AAP18979.1	ibpA	-1.01434	8.62244e-06	heat shock protein		AAP18944.1	atpG	1.44584	3.06676e-24	membrane-bound ATP synthase%2C F1 sector%2C gamma-subunit
AAP17983.1	yfiL	-0.813109	0.000815562	hypothetical protein		AAP17690.1	nuoG	-1.02721	5.81038e-06	NADH dehydrogenase I chain G		AAP19380.1	rplO	1.44479	3.18205e-24	50S ribosomal subunit protein L15
AAP18339.1	cds2791	-0.813294	0.000373838	hypothetical protein		AAP18094.1	cysJ	-1.02914	5.68345e-06	sulfite reductase (NADPH)%2C flavoprotein beta subunit		AAP18753.1	rpmE	1.44149	4.80749e-24	50S ribosomal subunit protein L31
NP_858222.1	cds4136	-0.813905	0.00135807	transposase/IS protein		AAP16226.1	cds677	-1.03354	1.86104e-05	putative minor tail protein		AAP19609.1	sms	1.44049	8.29957e-24	probable ATP-dependent protease
NP_858264.1	ipgA	-0.814711	0.000352757	chaperone IpgA		AAP17683.1	nuoN	-1.03602	5.04749e-06	NADH dehydrogenase I chain N		AAP15572.1	slpA	1.43973	2.4194e-23	probable FKBX-type 16kD peptidyl-prolyl cis-trans isomerase (a rotamase)
NP_858275.1	mxiL	-0.815234	0.000349359	Mxi-Spa secretion machinery protein MxiL		AAP17352.1	yedF	-1.03614	9.24267e-06	hypothetical protein		AAP18089.1	cysN	1.43966	5.10977e-24	ATP-sulfurylase (ATP:sulfate adenylyltransferase)%2C subunit 1
NP_858271.1	mxiI	-0.816785	0.000339234	Mxi-Spa secretion machinery protein MxiI		AAP16090.1	sdhB	-1.04907	3.70856e-06	succinate dehydrogenase%2C iron sulfur protein		AAP15630.1	mraY	1.43496	1.40622e-23	phospho-N-acetylmuramoyl-pentapeptide transferase
AAP15960.1	ybaQ	-0.819692	0.000352223	hypothetical protein		AAP17692.1	nuoE	-1.05787	3.27246e-06	NADH dehydrogenase I chain E		AAP15576.1	carA	1.43449	7.7007e-24	carbamoyl-phosphate synthetase%2C glutamine (small) subunit
AAP18621.1	yjbO	-0.820264	0.000392275	hypothetical protein		AAP17241.1	eda	-1.05856	3.68547e-06	2-keto-3-deoxygluconate 6-phosphate aldolase and 2-keto-4-hydroxyglutarate aldolase		AAP17094.1	pntB	1.42727	1.16135e-23	pyridine nucleotide transhydrogenase%2C beta subunit
AAP18340.1	exbD	-0.827729	0.000288473	enterochelin transporter (uptake)		AAP16743.1	oppB	-1.06082	3.10478e-06	oligopeptide transport permease protein		AAP17153.1	cds1602	1.42538	4.14203e-22	putative transport protein
AAP18767.1	yiiS	-0.829661	0.00031773	hypothetical protein		AAP16714.1	hemK	-1.06438	3.55078e-06	possible protoporphyrinogen oxidase		AAP17572.1	mglA	1.42434	2.04807e-22	ATP-binding component of methyl-galactoside transport and galactose taxis
AAP16888.1	cds1339	-0.82985	0.000295796	hypothetical protein		AAP19162.1	dppF	-1.07756	2.11294e-06	putative ATP-binding component of dipeptide transport system		AAP18749.1	metL	1.40123	7.35631e-23	aspartokinase II and homoserine dehydrogenase II
AAP16854.1	cds1305	-0.834201	0.000328694	IS1 orfB		AAP15573.1	lytB	-1.07842	2.25626e-06	LytB protein		AAP18750.1	metB	1.39999	1.06022e-22	cystathionine gamma-synthase
AAP17270.1	cds1719	-0.837478	0.00109546	IS629 orfB		AAP17009.1	ppsA	-1.07851	1.97787e-06	phosphoenolpyruvate synthase		AAP18568.1	accB	1.39886	9.76552e-23	acetyl CoA carboxylase%2C carrier of biotin%2C BCCP subunit
AAP16407.1	cds859	-0.837845	0.00107919	IS1 orfA		AAP15551.1	thrC	-1.07901	1.96165e-06	threonine synthase		AAP19299.1	yrfH	1.39115	6.84035e-22	hypothetical protein
AAP16393.1	ybhH	-0.83805	0.00326938	hypothetical protein		AAP19172.1	dctA	-1.07963	2.11804e-06	C4-dicarboxylate transport protein		AAP17799.1	cysP	1.38054	2.85899e-22	thiosulfate binding protein
AAP18169.1	cds2621	-0.838463	0.00565503	IS3 orfB		AAP19576.1	hpaD	-1.08018	1.04854e-05	homoprotocatechuate dyoxygenase		AAP18994.1	rnpA	1.38017	3.55392e-22	RNase P%2C protein component%3B protein C5
AAP16665.1	cds1116	-0.84181	0.000269924	hypothetical protein		AAP19298.1	yrfI	-1.08712	1.84158e-06	hypothetical protein		AAP18891.1	yifK	1.37458	2.62784e-21	putative amino acid/amine transport protein
NP_858274.2	mxiN	-0.843004	0.000218209	Mxi-Spa secretion machinery protein MxiN		AAP19249.1	livM	-1.08805	1.69124e-06	high-affinity branched-chain amino acid transport protein%2C membrane component		AAP15622.1	cds74	1.36291	1.13051e-15	IS1 orfA
NP_858261.1	ipaB	-0.843356	0.000216547	IpaB%2C secreted by the Mxi-Spa secretion machinery%2C required for entry into epithelial cells		AAP17572.1	mglA	-1.09841	1.75676e-06	ATP-binding component of methyl-galactoside transport and galactose taxis		AAP16154.1	mrdB	1.35825	2.67802e-21	rod shape-determining membrane protein
NP_858265.1	icsB	-0.844715	0.000212075	IcsB%2C invasion protein		AAP18479.1	yhbT	-1.11285	1.00998e-06	hypothetical protein		AAP15729.1	rcsF	1.35459	4.78846e-20	exopolysaccharide synthesis regulator
AAP17206.1	yddM	-0.846053	0.00021654	hypothetical protein		AAP17094.1	pntB	-1.12789	6.784e-07	pyridine nucleotide transhydrogenase%2C beta subunit		AAP15549.1	thrA	1.35283	1.53689e-21	aspartokinase I%2C homoserine dehydrogenase I
AAP15996.1	ybcH	-0.847298	0.000432911	hypothetical protein		AAP18585.1	aroE	-1.13032	7.56883e-07	dehydroshikimate reductase		AAP17694.1	nuoB	1.34956	2.32553e-21	NADH dehydrogenase I chain B
AAP17326.1	otsB	-0.848244	0.000262153	trehalose-6-phosphate phophatase		AAP19161.1	dppD	-1.13426	6.15016e-07	putative ATP-binding component of dipeptide transport system		AAP19071.1	mutM	1.34928	1.58875e-19	formamidopyrimidine DNA glycosylase
AAP17271.1	cds1720	-0.848503	0.000387308	IS1 orfB		AAP17685.1	nuoL	-1.13837	5.55846e-07	NADH dehydrogenase I chain L		AAP15881.1	secF	1.3492	3.53002e-21	membrane protein
AAP17902.1	cds2354	-0.852376	0.000187449	hypothetical protein		AAP19160.1	dppC	-1.15375	4.11744e-07	dipeptide transport system permease protein 2		AAP19248.1	livH	1.34888	3.26222e-21	high-affinity branched-chain amino acid transport protein%2C membrane component
AAP16707.1	ychH	-0.857057	0.000207111	hypothetical protein		AAP17686.1	nuoK	-1.16411	3.85768e-07	NADH dehydrogenase I chain K		AAP18090.1	cysD	1.34878	2.58657e-21	ATP-sulfurylase (ATP:sulfate adenylyltransferase)%2C subunit 2
AAP17570.1	cds2023	-0.858189	0.000249816	putative oxidoreductase		AAP17687.1	nuoJ	-1.16593	3.21612e-07	NADH dehydrogenase I chain J		AAP17852.1	uraA	1.34339	2.66235e-19	uracil transport protein
AAP18215.1	pgk	-0.863595	0.000153903	phosphoglycerate kinase		AAP16745.1	oppD	-1.16686	2.99968e-07	ATP-binding protein of oligopeptide ABC transport system		AAP17241.1	eda	1.34326	1.69946e-20	2-keto-3-deoxygluconate 6-phosphate aldolase and 2-keto-4-hydroxyglutarate aldolase
NP_858351.1	cds4262	-0.865449	0.00015297	hypothetical protein		AAP16662.1	cds1113	-1.17642	5.27381e-07	IS1 orfB		AAP17019.1	cds1470	1.34295	5.07505e-21	putative oxidoreductase%2C major subunit
AAP17969.1	kgtP	-0.866179	0.000149704	alpha-ketoglutarate permease		AAP18087.1	ygbE	-1.18932	2.04455e-07	putative cytochrome oxidase subunit		AAP19202.1	yhiQ	1.34188	7.46479e-20	hypothetical protein
AAP17774.1	cds2226	-0.867308	0.000167159	hypothetical protein		AAP18092.1	cysH	-1.19613	1.54858e-07	3-phosphoadenosine 5-phosphosulfate reductase		AAP17719.1	purF	1.34075	4.33209e-21	amidophosphoribosyltransferase%2C PRPP amidotransferase
NP_858259.1	ipaD	-0.870338	0.000136079	hypothetical protein		NP_858194.1	cds4108	-1.19904	3.80784e-05	IS1294 transposase		AAP19608.1	serB	1.33841	7.53215e-21	3-phosphoserine phosphatase
NP_858270.1	mxiH	-0.875334	0.000124806	Mxi-Spa secretion machinery protein MxiH		AAP16934.1	yeaF	-1.2093	1.09121e-07	hypothetical protein		AAP16917.1	yeaZ	1.33765	1.25354e-20	hypothetical protein
NP_858267.1	ipgE	-0.878048	0.000118972	IpgE%2C cytoplasmic chaperone for IpgD		AAP17689.1	nuoH	-1.21053	1.08526e-07	NADH dehydrogenase I chain H		AAP15912.1	ampG	1.33682	1.23664e-20	beta-lactamase induction signal transducer AmpG
AAP17112.1	cds1563	-0.879244	0.000648908	IS1 orfA		AAP16744.1	oppC	-1.22133	8.803e-08	oligopeptide transport permease protein		AAP19556.1	rpsR	1.33402	5.81316e-21	30S ribosomal subunit protein S18
AAP16737.1	cds1188	-0.881128	0.000288298	IS4 orf		AAP17795.1	cysM	-1.22901	7.03935e-08	cysteine synthase B%2C O-acetylserine sulfhydrolase B		AAP18909.1	rep	1.32197	2.63028e-20	rep helicase
NP_858262.1	ipgC	-0.881332	0.000112188	IpgC%2C cytoplasmic chaperone for IpaB and IpaC		AAP17105.1	fumA	-1.23036	6.93364e-08	fumarase A%2C fumarate hydratase Class I%3B aerobic isozyme		AAP16061.1	modF	1.3179	1.91749e-20	ATP-binding component of molybdate transport system
AAP19291.1	feoA	-0.882212	0.000115128	ferrous iron transport protein A		AAP19337.1	argD	-1.23089	9.43245e-08	acetylornithine delta-aminotransferase		AAP19056.1	spoT	1.31235	2.37411e-20	(p)ppGpp synthetase II and guanosine-3%2C5-bis pyrophosphate 3-pyrophosphohydrolase
NP_858352.1	cds4263	-0.882721	0.000118269	hypothetical protein		AAP16903.1	cds1354	-1.24125	3.42378e-05	IS1 orfA		AAP15731.1	yaeE	1.31211	2.73386e-20	putative transport system permease protein
AAP18811.1	yihU	-0.885344	0.000283783	putative dehydrogenase		AAP15803.1	ykgG	-1.24626	1.31145e-07	putative transporter		AAP19555.1	priB	1.31047	2.57501e-20	primosomal replication protein N
AAP16621.1	ycfQ	-0.888401	0.000112906	hypothetical protein		AAP17688.1	nuoI	-1.2532	4.25668e-08	NADH dehydrogenase I chain I		AAP16788.1	ycjD	1.30665	3.9246e-15	hypothetical protein
AAP18277.1	cds2729	-0.889716	0.00140134	IS629 orfA		AAP17684.1	nuoM	-1.26089	3.64097e-08	NADH dehydrogenase I chain M		AAP15950.1	htpG	1.30601	3.48183e-20	chaperone Hsp90%2C heat shock protein C 62.5
AAP17050.1	cds1501	-0.890507	0.000492116	hypothetical protein		AAP17390.1	cds1839	-1.26108	9.16871e-08	hypothetical protein		AAP18913.1	ilvA	1.28927	1.25693e-19	threonine deaminase (dehydratase)
AAP18257.1	cds2709	-0.89476	0.00044	putative membrane protein		AAP19159.1	dppB	-1.28561	1.76151e-08	dipeptide transport system permease protein 1		AAP18915.1	ilvE	1.28319	1.60409e-19	branched-chain amino-acid aminotransferase
AAP17872.1	cds2324	-0.89801	0.000100703	hypothetical protein		AAP19578.1	hpaG	-1.2981	6.66645e-08	5-oxo-1%2C2%2C5-tricarboxilic-3-penten acid decarboxilase/isomerase		AAP16633.1	potC	1.28223	3.53147e-19	spermidine/putrescine transport system permease
NP_858263.1	ipgB1	-0.908175	6.95023e-05	protein IpgB1		AAP15577.1	carB	-1.32915	5.68227e-09	carbamoyl-phosphate synthase large subunit		AAP19357.1	tufA	1.28162	1.5209e-19	protein chain elongation factor EF-Tu (duplicate of tufB)
AAP18050.1	cds2502	-0.910536	0.000224259	putative flavodoxin		AAP16982.1	cds1433	-1.33177	6.91565e-08	IS1 orfA		AAP17123.1	ydgO	1.2801	9.6299e-19	hypothetical protein
NP_858258.1	ipaA	-0.910993	6.58672e-05	hypothetical protein		AAP18737.1	argC	-1.33335	6.98765e-09	N-acetyl-gamma-glutamylphosphate reductase		AAP18561.1	yhdE	1.27714	1.39201e-18	hypothetical protein
NP_858378.1	mvpA	-0.914702	6.30971e-05	plasmid maintenance protein		AAP18945.1	atpD	-1.35442	2.9393e-09	membrane-bound ATP synthase%2C F1 sector%2C beta-subunit		AAP15928.1	glnK	1.2744	3.17551e-09	nitrogen regulatory protein P-II 2
NP_858368.1	shf	-0.915039	6.13411e-05	carbohydrate transport protein		AAP18735.1	argH	-1.377	1.83022e-09	argininosuccinate lyase		AAP18350.1	cds2802	1.27338	8.97446e-19	hypothetical protein
NP_858242.1	cds4155	-0.918187	5.80011e-05	hypothetical protein		AAP16320.1	artM	-1.39503	1.34916e-09	arginine 3rd transport system permease protein		AAP16981.1	cds1432	1.27307	4.81963e-06	IS1 orfB
NP_858260.2	ipaC	-0.921634	5.4185e-05	IpaC%2C secreted by the Mxi-Spa secretion machinery%2C required for entry into epithelial cells		AAP18748.1	metF	-1.40046	9.66664e-10	5%2C10-methylene-tetrahydrofolate reductase		AAP19055.1	spoU	1.27267	4.54929e-19	putative RNA methylase
AAP17583.1	yeiK	-0.924413	0.00126553	hypothetical protein		AAP19577.1	hpaE	-1.41418	3.46983e-09	5-carboxy-2-hydroxymuconate semialdehyde dehydrogenase		AAP18648.1	gltP	1.2643	9.9751e-19	glutamate-aspartate symport protein
AAP17068.1	cds1519	-0.929558	0.000527432	ISEhe3 orfA		AAP19147.1	cspA	-1.41448	5.99035e-10	cold shock protein 7.4%2C transcriptional activator of hns		AAP19163.1	yhjV	1.26293	1.42403e-18	putative transporter protein
AAP18408.1	ygjN	-0.931746	6.73333e-05	hypothetical protein		AAP16504.1	cds956	-1.42173	2.93673e-08	IS1 orfB		AAP17122.1	cds1573	1.26047	1.01912e-18	putative membrane protein
AAP16539.1	csgF	-0.932715	0.000427558	Curli production assembly/transport component CsgF precursor		AAP16502.1	cspH	-1.44	1.83074e-09	cold shock-like protein		AAP15567.1	rpsT	1.2492	1.34179e-18	30S ribosomal subunit protein S20
AAP18160.1	lysA	-0.933778	4.41485e-05	diaminopimelate decarboxylase		AAP18093.1	cysI	-1.44288	2.93388e-10	sulfite reductase%2C alpha subunit		AAP18027.1	proX	1.24598	1.9726e-18	glycine betaine/L-proline transport system permease protein
NP_858136.1	ospB	-0.93399	4.60205e-05	OspB protein		AAP16319.1	artJ	-1.44837	3.73046e-10	arginine 3rd transport system periplasmic binding protein		AAP17796.1	cysA	1.24585	1.52065e-18	ATP-binding component of sulfate permease A protein
NP_858350.1	cds4261	-0.937943	4.1291e-05	hypothetical protein		AAP16503.1	cds955	-1.45629	2.3077e-10	IS1 orfA		AAP17880.1	guaA	1.2413	2.12642e-18	GMP synthetase (glutamine-hydrolyzing)
AAP16645.1	cds1096	-0.938775	6.2762e-05	hypothetical bacteriophage protein		AAP17714.1	hisM	-1.46861	2.05822e-10	histidine transport%2C membrane protein M		AAP16713.1	prfA	1.23911	4.21613e-18	peptide chain release factor RF-1
AAP17213.1	cds1662	-0.947901	0.00073047	IS1 orfA		AAP18493.1	argG	-1.50087	6.38292e-11	argininosuccinate synthetase		AAP17734.1	yfcA	1.23522	4.49305e-18	putative structural protein
AAP16273.1	dps	-0.948949	3.37259e-05	global regulator protein Dps		AAP16322.1	artI	-1.55785	1.53212e-11	arginine 3rd transport system periplasmic binding protein		AAP15915.1	tig	1.23427	2.83761e-18	trigger factor
AAP16363.1	cds814	-0.948953	0.00101786	ISSfl3 orfA		AAP17713.1	hisP	-1.56095	1.69946e-11	ATP-binding component of histidine transport		AAP19554.1	rpsF	1.23181	3.28988e-18	30S ribosomal subunit protein S6
NP_858192.1	cds4105	-0.95295	3.07292e-05	hypothetical protein		AAP16321.1	artQ	-1.62657	2.31482e-12	arginine 3rd transport system permease protein		AAP18560.1	cafA	1.23179	4.81471e-18	ribonuclease G
AAP17454.1	hisA	-0.962676	2.55872e-05	N-(5-phospho-L-ribosyl-formimino)-5-amino-1-(5- phosphoribosyl)-4-imidazolecarboxamide isomerase		AAP19441.1	argI	-1.63994	1.38979e-12	ornithine carbamoyltransferase 1		AAP19531.1	yjeT	1.23073	3.59999e-09	hypothetical protein
NP_858359.2	ipaH9	-0.981393	1.83118e-05	invasion plasmid antigen%2C secreted by the Mxi-Spa secretion machinery		AAP16138.1	ybeK	-1.64409	1.51463e-12	putative tRNA synthetase		AAP18267.1	speC	1.23027	1.37606e-17	ornithine decarboxylase isozyme
AAP16540.1	csgE	-0.986047	9.06849e-05	Curli production assembly/transport component CsgE precursor		AAP18910.1	ppiC	-1.70506	1.92227e-13	peptidyl-prolyl cis-trans isomerase C (rotamase C)		AAP19083.1	waaI	1.22726	1.10449e-17	lipid A-core%2C surface polymer ligase
AAP16332.1	poxB	-0.988715	2.02196e-05	pyruvate oxidase		AAP18911.1	ilvC	-1.70707	1.282e-13	ketol-acid reductoisomerase		AAP15730.1	yaeC	1.22609	4.71098e-18	putative lipoprotein
AAP16535.1	ycdU	-0.99092	6.33574e-05	hypothetical protein		AAP18736.1	argB	-1.83773	3.67029e-15	acetylglutamate kinase		AAP15560.1	dnaK	1.22313	5.34789e-18	chaperone Hsp70%3B autoregulated heat shock protein
AAP17449.1	hisG	-0.992939	1.43265e-05	ATP phosphoribosyltransferase		AAP18856.1	metE	-2.41044	1.78019e-24	tetrahydropteroyltriglutamate methyltransferase		AAP15804.1	ykgF	1.22186	5.12001e-17	hypothetical protein
AAP17874.1	trbJ	-0.997496	1.35047e-05	putative mating pair formation protein								AAP16674.1	cds1125	1.2211	1.24301e-15	IS3 orfB
AAP15772.1	cds224	-0.998267	2.57279e-05	putative packaged DNA stabilization protein								AAP16667.1	cds1118	1.221	1.01509e-17	hypothetical protein
AAP18766.1	yiiT	-1.00306	1.25605e-05	putative regulator								AAP16294.1	yliG	1.21653	1.38778e-17	hypothetical protein
AAP15931.1	ybaY	-1.00424	1.18706e-05	conserved hypothetical lipoprotein								AAP19158.1	dppA	1.21075	1.11555e-17	dipeptide transport protein
AAP17040.1	ydeI	-1.00986	4.01609e-05	hypothetical protein								AAP17608.1	rplY	1.21061	1.41282e-17	50S ribosomal subunit protein L25
AAP16678.1	umuD	-1.01196	0.000202875	mutagenesis and repair protein								AAP18479.1	yhbT	1.20733	2.41345e-17	hypothetical protein
NP_858243.2	cds4156	-1.01271	9.62049e-06	hypothetical protein								AAP19557.1	rplI	1.20628	1.61724e-17	50S ribosomal subunit protein L9
AAP17873.1	trbL	-1.01342	1.1198e-05	putative mating pair formation protein								AAP19354.1	rpsL	1.2042	1.70811e-17	30S ribosomal subunit protein S12
AAP18635.1	soxR	-1.01416	1.21415e-05	redox-sensing activator of soxS								AAP18978.1	ibpB	1.20342	2.44261e-16	heat shock protein
AAP17584.1	yeiL	-1.01696	4.93148e-05	putative transcriptional regulator								AAP18665.1	yjdB	1.20268	9.75292e-16	hypothetical protein
AAP16759.1	yciF	-1.01949	6.02945e-05	putative structural protein								AAP18936.1	gidA	1.20087	3.15841e-17	glucose-inhibited division protein GidA
NP_858357.1	ccdA	-1.02055	1.02176e-05	plasmid maintenance protein CcdA								AAP18563.1	mreC	1.20058	3.18372e-17	rod shape-determining protein
AAP17392.1	ipaH_5	-1.02225	1.85309e-05	invasion plasmid antigen								AAP18943.1	atpA	1.20038	2.07881e-17	membrane-bound ATP synthase%2C F1 sector%2C alpha-subunit
AAP17455.1	hisF	-1.02338	7.82994e-06	imidazole glycerol phosphate synthase subunit in heterodimer with HisH%2C imidazole glycerol phsphate synthase holoenzyme								AAP16785.1	rnb	1.19772	2.65192e-17	RNase II%2C mRNA degradation
AAP17813.1	cds2265	-1.02556	0.00016978	hypothetical protein								AAP17424.1	cobS	1.19266	9.645e-16	cobalamin 5-phosphate synthase
AAP18168.1	cds2620	-1.02796	0.00023436	IS3 orfA								AAP16203.1	cds654	1.18992	1.04041e-12	putative bacteriophage protein
AAP17812.1	cds2264	-1.03306	4.96351e-05	hypothetical protein								AAP16063.1	galT	1.18723	1.33458e-16	galactose-1-phosphate uridylyltransferase
AAP17006.1	ydiE	-1.03606	6.81395e-06	hypothetical protein								AAP16086.1	sucC	1.18484	5.40985e-17	succinyl-CoA synthetase%2C beta subunit
AAP16806.1	pspE	-1.03779	6.72775e-06	phage shock protein								AAP16090.1	sdhB	1.18435	5.99645e-17	succinate dehydrogenase%2C iron sulfur protein
AAP18604.1	xylE	-1.03819	6.97613e-06	xylose-proton symportor								AAP17762.1	cds2214	1.18136	2.35418e-15	hypothetical protein
AAP16361.1	ycaC	-1.03832	1.78581e-05	hypothetical protein								AAP16937.1	gapA	1.18022	6.75591e-17	glyceraldehyde-3-phosphate dehydrogenase A
AAP16640.1	cds1091	-1.03849	6.87867e-05	hypothetical bacteriophage protein								AAP18966.1	ilvB	1.17955	8.30081e-17	acetolactate synthase I%2C valine-sensitive%2C large subunit
AAP17775.1	cds2227	-1.03902	5.85942e-06	hypothetical protein								AAP16632.1	potD	1.17546	1.03621e-16	spermidine/putrescine periplasmic transport protein
NP_858191.1	cds4104	-1.04193	6.70764e-06	IS600 ORF1								AAP18897.1	wecD	1.17545	1.12119e-15	hypothetical protein
AAP18603.1	yjbA	-1.05866	4.7948e-06	hypothetical protein								AAP19596.1	prfC	1.16872	2.32287e-16	peptide chain release factor RF-3
AAP16533.1	cds985	-1.06107	8.6147e-06	IS3 orfB								AAP19356.1	fusA	1.16812	1.34937e-16	GTP-binding protein chain elongation factor EF-G
AAP16541.1	csgD	-1.06801	8.56095e-06	probable csgAB operon transcriptional regulatory protein								AAP15877.1	queA	1.16739	2.13876e-16	probable S-adenosylmethionine:tRNA ribosyltransferase-isomerase
AAP17776.1	cds2228	-1.06834	3.1939e-06	hypothetical protein								AAP16133.1	lnt	1.16512	2.06087e-16	apolipoprotein N-acyltransferase%2C copper homeostasis protein
AAP18746.1	frwC	-1.07997	6.53166e-05	PTS system%2C fructose-like enzyme II component								AAP18510.1	yrbA	1.16477	5.92082e-16	hypothetical protein
NP_858294.1	cds4207	-1.08494	0.000509887	IS1294 transposase								AAP16149.1	ybeN	1.16454	8.49338e-16	hypothetical protein
AAP17875.1	cds2327	-1.08595	2.28018e-06	putative stabilization protein								AAP16892.1	prc	1.16285	2.02126e-16	carboxy-terminal protease for penicillin-binding protein 3
NP_858193.2	cds4106	-1.09546	1.81213e-06	hypothetical protein								AAP17332.1	ftn	1.16066	8.07703e-16	cytoplasmic ferritin
AAP17456.1	hisI	-1.09603	1.74388e-06	phosphoribosyl-amp cyclohydrolase%3B phosphoribosyl-ATP pyrophosphatase								AAP16156.1	dacA	1.15903	2.92131e-16	D-alanyl-D-alanine carboxypeptidase%2C fraction A%3B penicillin-binding protein 5
YP_001449237.1	ospE1	-1.11029	2.16051e-06	OspE1								AAP16291.1	cds742	1.159	4.57126e-16	putative transport system permease protein
AAP16758.1	yciE	-1.11333	3.41727e-06	hypothetical protein								AAP16666.1	cds1117	1.15827	4.18758e-16	hypothetical protein
AAP16467.1	rmf	-1.11891	1.06088e-06	ribosome modulation factor								AAP17442.1	yeeE	1.15736	2.52128e-15	putative transport system permease protein
AAP16805.1	pspD	-1.13143	1.07511e-06	phage shock protein								AAP19379.1	rpmD	1.15601	3.04727e-16	50S ribosomal subunit protein L30
AAP17172.1	ynhG	-1.13262	8.24598e-07	hypothetical protein								AAP19262.1	gntK	1.15528	8.41471e-14	gluconokinase 2
AAP16519.1	ycdF	-1.14116	3.0321e-06	hypothetical protein								AAP17649.1	nrdA	1.15516	3.70494e-16	ribonucleoside diphosphate reductase 1%2C alpha subunit%2C B1
AAP19597.1	osmY	-1.15944	4.65701e-07	hyperosmotically inducible periplasmic protein								AAP19064.1	pyrE	1.14874	4.51881e-15	orotate phosphoribosyltransferase
AAP17453.1	hisH	-1.1772	2.97236e-07	glutamine amidotransferase subunit of heterodimer with HisF%2C imidazole glycerol phosphate synthase holoenzyme								AAP18546.1	rplM	1.14645	4.85589e-16	50S ribosomal subunit protein L13
AAP16579.1	grxB	-1.18463	2.57184e-07	glutaredoxin 2								AAP16426.1	ycaH	1.14585	8.39715e-16	putative enzyme
AAP17978.1	yfiA	-1.19545	1.93484e-07	putative yhbH sigma 54 modulator								AAP16314.1	potG	1.1448	2.06702e-15	ATP-binding component of putrescine transport system
AAP18527.1	yrbL	-1.20054	1.71972e-07	hypothetical protein								AAP15985.1	ybbF	1.14474	1.10216e-15	hypothetical protein
AAP17588.1	fruA	-1.21564	1.24876e-07	PTS system%2C fructose-specific transport protein								AAP19355.1	rpsG	1.1444	5.48657e-16	30S ribosomal subunit protein S7
AAP18974.1	yidL	-1.21714	5.40333e-07	putative ARAC-type regulatory protein								AAP19303.1	mrcA	1.13423	1.91426e-15	peptidoglycan synthetase%2C penicillin-binding protein 1A
AAP17201.1	osmC	-1.22525	9.81963e-08	osmotically inducible protein								AAP18236.1	yqgB	1.12831	9.80704e-15	hypothetical protein
AAP16028.1	entE	-1.23116	1.60975e-07	2%2C3-dihydroxybenzoate-AMP ligase								AAP19610.1	nadR	1.12438	2.75887e-15	probable nadAB transcriptional regulator
AAP16804.1	pspC	-1.2393	8.30261e-08	putative regulator of phage shock response								AAP17594.1	yeiP	1.11975	2.92264e-14	putative elongation factor
AAP16295.1	cds746	-1.24865	7.99757e-08	putative receptor								AAP18759.1	menA	1.1185	8.70319e-14	1%2C4-dihydroxy-2-naphthoate octaprenyltransferase
AAP17452.1	hisB	-1.2627	4.03681e-08	imidazole glycerol phosphate dehydratase and histidinol-phosphate phosphatase								AAP18492.1	yhbC	1.11719	2.8451e-15	hypothetical protein
AAP16110.1	ybfA	-1.29067	2.684e-08	hypothetical protein								AAP16419.1	aroA	1.11343	3.30204e-15	5-enolpyruvylshikimate-3-phosphate synthetase
AAP17543.1	cds1996	-1.29246	2.1365e-08	DNA-damage-inducible protein								AAP18509.1	murA	1.11325	3.8945e-15	UDP-N-glucosamine 1-carboxyvinyltransferase
AAP17450.1	hisD	-1.33396	7.12635e-09	oxidoreductase for L-histidinal:NAD+ and L-histidinol:NAD+								AAP18158.1	aas	1.11166	5.64108e-15	2-acyl-glycerophospho-ethanolamine acyltransferase%3B acyl-acyl-carrier protein synthetase
AAP18814.1	yihR	-1.33588	2.34003e-07	putative aldose-1-epimerase								AAP18990.1	recF	1.11085	5.59804e-15	Rec protein
AAP16267.1	cds718	-1.34672	2.72586e-07	IS4 orf								AAP17853.1	upp	1.1094	1.04671e-14	uracil phosphoribosyltransferase
AAP15686.1	fhuA	-1.35314	4.38785e-09	outer membrane protein receptor for ferrichrome%2C colicin M%2C and phages T1%2C T5%2C and phi80								AAP18962.1	uhpC	1.10736	1.13292e-13	regulator of uhpT
AAP18802.1	cds3253	-1.37599	1.08991e-05	hypothetical protein								AAP18885.1	hemD	1.10588	8.85531e-15	uroporphyrinogen III synthase
AAP17544.1	cds1997	-1.37862	5.34498e-06	hypothetical bacteriophage protein								AAP16662.1	cds1113	1.1032	4.91246e-13	IS1 orfB
AAP17041.1	cds1492	-1.38386	1.40775e-05	IS600								NP_858194.1	cds4108	1.10177	1.85057e-06	IS1294 transposase
AAP17259.1	ipaH_4	-1.38495	4.61664e-09	invasion plasmid antigen								AAP15677.1	cds129	1.10175	1.89382e-08	IS1 orfB
AAP17981.1	tyrA	-1.38905	1.75644e-09	chorismate mutase-T and prephenate dehydrogenase								AAP18893.1	wecF	1.10092	3.83003e-14	TDP-Fuc4NAc:lipidII transferase
AAP16622.1	ycfR	-1.42063	1.07262e-09	hypothetical protein								AAP19135.1	glyQ	1.10083	8.37589e-15	glycine tRNA synthetase%2C alpha subunit
YP_001449236.1	ospE2	-1.42432	2.28593e-09	OspE2								AAP18916.1	ilvM	1.10054	1.106e-14	acetolactate synthase II%2C small subunit
AAP16803.1	pspB	-1.43457	6.87981e-10	phage shock protein								AAP19533.1	yjeB	1.10032	1.18151e-14	hypothetical protein
AAP19564.1	cds4014	-1.446	3.43052e-06	IS1 orfA								AAP18993.1	rpmH	1.09786	9.08682e-15	50S ribosomal subunit protein L34
AAP17258.1	cds1707	-1.44606	8.15919e-10	hypothetical bacteriophage protein								AAP17428.1	is629b	1.09725	1.67038e-05	IS629 orfB
AAP16802.1	pspA	-1.45007	3.64747e-10	phage shock protein%2C inner membrane protein								AAP18899.1	rffG	1.09659	1.44013e-14	dTDP-glucose 4%2C6-dehydratase
NP_858183.2	cds4097	-1.46914	4.22108e-10	IS1 encoded protein								AAP16635.1	potA	1.08954	1.60661e-14	ATP-binding component of spermidine/putrescine transport
AAP19029.1	cds3480	-1.47604	8.50183e-08	IS2 orfB								AAP19084.1	rfaC	1.08941	1.87677e-14	heptosyl transferase I
AAP19359.1	bfr	-1.48181	1.53572e-10	bacterioferrin								AAP15855.1	cds306	1.08646	8.25382e-06	IS600 orfB
NP_858182.2	insA	-1.48522	5.21929e-09	IS1 ORF1								AAP18235.1	speA	1.08506	1.65969e-14	biosynthetic arginine decarboxylase
AAP16068.1	cds519	-1.51813	9.75093e-11	putative homeobox protein								AAP16148.1	holA	1.08445	2.34053e-14	DNA polymerase III%2C delta subunit
AAP17982.1	aroF	-1.52188	4.92237e-11	3-deoxy-D-arabinoheptulosonate-7-phosphate synthase (DAHP synthetase%2C tyrosine repressible)								AAP16459.1	pyrD	1.08439	3.71489e-14	dihydro-orotate dehydrogenase
AAP17451.1	hisC	-1.55414	2.02088e-11	histidinol-phosphate aminotransferase								AAP17881.1	guaB	1.08277	1.88543e-14	IMP dehydrogenase
AAP19035.1	imm	-1.55447	2.0685e-11	putative membrane transport protein								AAP18264.1	yggX	1.08218	2.38191e-13	hypothetical protein
AAP17278.1	cds1727	-1.65361	2.67232e-12	hypothetical phage protein								AAP18487.1	rpsO	1.08137	1.88835e-14	30S ribosomal subunit protein S15
AAP19358.1	yheA	-1.70331	2.68202e-13	hypothetical protein								AAP16085.1	sucD	1.08115	1.86365e-14	succinyl-CoA synthetase%2C alpha subunit
AAP19036.1	shiE	-1.78056	3.97519e-14	hypothetical protein								AAP16903.1	cds1354	1.07997	6.77245e-06	IS1 orfA
AAP17777.1	mntH	-1.78257	2.37673e-14	putative transport system permease								AAP15561.1	dnaJ	1.07875	2.67813e-14	chaperone with DnaK%3B heat shock protein
AAP18216.1	epd	-1.78963	1.76335e-14	D-erythrose 4-phosphate dehydrogenase								AAP16091.1	sdhA	1.07256	2.95936e-14	succinate dehydrogenase%2C flavoprotein subunit
AAP17589.1	fruK	-1.80711	1.08131e-14	fructose-1-phosphate kinase								AAP18532.1	gltD	1.06839	3.75174e-14	glutamate synthase%2C small subunit
AAP17590.1	fruB	-1.85269	2.49506e-15	PTS system%2C fructose-specific IIA/fpr component								AAP18895.1	wzxE	1.06802	1.34856e-13	putative cytochrome
AAP16738.1	adhE	-1.88513	7.99037e-16	CoA-linked acetaldehyde dehydrogenase and iron-dependent alcohol dehydrogenase%3B pyruvate-formate-lyase deactivase								AAP15832.1	gpt	1.06661	1.09629e-13	guanine-hypoxanthine phosphoribosyltransferase
AAP19590.1	bglJ	-1.98584	4.3044e-17	2-component transcriptional regulator								AAP17124.1	cds1575	1.05875	2.99017e-13	hypothetical protein
AAP17177.1	ynhE	-1.99697	1.94255e-17	hypothetical protein								AAP18370.1	ygiD	1.05783	3.08887e-13	hypothetical protein
AAP16027.1	fepB	-2.05038	3.57062e-18	ferric enterobactin (enterochelin) binding protein								AAP16818.1	ycjF	1.05556	1.61819e-13	hypothetical protein
AAP19591.1	fhuF	-2.05702	2.4963e-18	hypothetical protein								AAP16612.1	ptsG	1.0553	7.49249e-14	glucose-specific IIBC component
AAP17276.1	sitC	-2.08496	9.14543e-19	Iron transport protein								AAP15632.1	ftsW	1.05511	9.44418e-14	membrane protein
AAP17178.1	ydiC	-2.09176	8.34176e-19	hypothetical protein								AAP15878.1	tgt	1.05366	8.95631e-14	tRNA-guanine transglycosylase
AAP16024.1	fepG	-2.1169	1.8045e-18	ferric enterobactin transport protein								AAP18383.1	ygiF	1.04972	1.89527e-13	hypothetical protein
AAP18024.1	nrdF	-2.13069	2.11982e-19	ribonucleoside-diphosphate reductase 2%2C beta chain								AAP15592.1	apaH	1.04913	2.24321e-13	diadenosine tetraphosphatase
AAP18023.1	nrdE	-2.14417	1.14361e-19	ribonucleoside-diphosphate reductase 2%2C alpha subunit								AAP17070.1	cds1521	1.04866	4.9575e-11	hypothetical protein
AAP16023.1	fepC	-2.14656	8.05308e-19	ATP-binding component of ferric enterobactin transport								AAP19077.1	waaG	1.04703	2.65418e-13	LPS alpha1%2C3-glucosyltransferase
AAP17176.1	ynhD	-2.16988	4.56319e-20	putative ATP-binding component of a transport system								AAP17758.1	evgS	1.04644	1.54388e-13	putative sensor for regulator EvgA
AAP18021.1	nrdH	-2.17121	7.96231e-20	glutaredoxin-like protein								AAP19251.1	livF	1.04258	1.7617e-13	ATP-binding component of leucine transport
AAP17275.1	sitB	-2.17755	3.26303e-20	Iron transport protein%2C ATP-binding component								AAP16084.1	farR	1.03936	2.43929e-13	transcriptional regulator of succinyl CoA synthetase operon
AAP17175.1	ynhC	-2.18251	2.7984e-20	hypothetical protein								AAP19023.1	pstA	1.03732	3.96265e-13	high-affinity phosphate-specific transport protein
AAP18022.1	nrdI	-2.20919	1.41463e-20	hypothetical protein								AAP17989.1	rpsP	1.03665	2.04366e-13	30S ribosomal subunit protein S16
AAP17277.1	sitD	-2.21538	8.37462e-21	Iron transport protein%2C inner membrane component								AAP18942.1	atpH	1.03578	2.12283e-13	membrane-bound ATP synthase%2C F1 sector%2C delta-subunit
AAP17174.1	cds1623	-2.25554	1.96048e-21	hypothetical protein								AAP18734.1	cds3185	1.03462	1.7134e-07	IS4 orf
AAP16025.1	fepD	-2.27861	1.46635e-21	ferric enterobactin (enterochelin) transport protein								AAP17598.1	spr	1.03337	2.461e-13	putative lipoprotein
AAP17274.1	sitA	-2.28452	6.22694e-22	Iron transport protein								AAP16609.1	tmk	1.03302	6.80129e-13	thymidylate kinase
AAP16017.1	entD	-2.30892	7.91417e-22	enterochelin synthetase%2C component D								AAP19002.1	yidY	1.02352	2.98222e-12	putative transport protein
AAP17173.1	ynhA	-2.48252	3.65485e-25	hypothetical protein								AAP19575.1	hpaF	1.02141	4.39221e-09	5-carboxymethyl-2-hydroxymuconate delta-isomerase
AAP16026.1	ybdA	-2.49837	2.42942e-25	hypothetical membrane protein P43								AAP19292.1	yhgF	1.02023	4.9706e-13	hypothetical protein
AAP19033.1	iucB	-2.53211	4.33892e-26	siderophore biosynthesis protein								AAP17695.1	nuoA	1.01957	5.39e-13	NADH dehydrogenase I chain A
AAP19034.1	iucA	-2.54913	2.15193e-26	siderophore biosynthesis protein								AAP19451.1	pyrB	1.01851	1.44293e-12	aspartate carbamoyltransferase%2C catalytic subunit
AAP19031.1	iucD	-2.62748	8.82101e-28	lysine:N6-hydroxylase								AAP17602.1	yejE	1.01838	2.18096e-12	putative transport system permease protein
AAP19032.1	iucC	-2.67218	1.40808e-28	siderophore biosynthesis protein								AAP17722.1	folC	1.01813	7.39298e-13	dihydrofolate:folylpolyglutamate synthetase%3B dihydrofolate synthetase
AAP19030.1	iutA	-2.88869	1.49593e-32	putative ferric siderophore receptor								AAP15880.1	secD	1.01802	5.22703e-13	membrane protein
AAP16020.1	entF	-4.12487	7.65726e-58	ATP-dependent serine activating enzyme								AAP17988.1	yfjA	1.01653	5.39111e-13	hypothetical protein
AAP16018.1	fepA	-4.30242	1.09008e-61	ferrienterobactin receptor precursor								AAP18584.1	yrdB	1.01528	2.18602e-12	hypothetical protein
AAP16019.1	fes	-4.39676	1.86089e-63	enterochelin esterase								AAP18636.1	yjcD	1.01206	9.89792e-13	hypothetical protein
												AAP18963.1	uhpB	1.00967	3.56089e-12	sensor histidine protein kinase%2C phosphorylates UhpA
												AAP17815.1	cds2267	1.00963	6.96587e-12	hypothetical protein
												AAP18692.1	metA	1.00896	9.27006e-13	homoserine transsuccinylase
												AAP19250.1	livG	1.00693	1.04832e-12	ATP-binding component of high-affinity branched-chain amino acid transport system
												AAP18117.1	yqcB	1.00292	1.79369e-11	hypothetical protein
												AAP16769.1	yciL	1.0024	1.50271e-12	hypothetical protein
												AAP18394.1	rpsU	1.00213	1.19907e-12	30S ribosomal subunit protein S21
												AAP16425.1	msbA	1.0005	1.35788e-12	ATP-binding transport protein%3B multicopy suppressor of htrB
												AAP15934.1	ybaA	0.996361	1.12641e-11	hypothetical protein
												AAP16597.1	yceC	0.991523	6.16176e-12	hypothetical protein
												AAP17531.1	metG	0.991231	2.07528e-12	methionine tRNA synthetase
												AAP18771.1	sbp	0.990467	4.66226e-12	periplasmic sulfate-binding protein
												AAP16164.1	cspE	0.989676	2.11548e-12	cold shock protein
												AAP15847.1	gtrII	0.985978	4.01498e-12	putative glucosyl tranferase II
												AAP16774.1	topA	0.985634	2.62826e-12	DNA topoisomerase type I%2C omega protein
												AAP18848.1	cds3299	0.984607	3.73294e-12	hypothetical protein
												AAP18531.1	gltB	0.983503	2.81378e-12	glutamate synthase%2C large subunit
												AAP17986.1	rplS	0.983301	3.04646e-12	50S ribosomal subunit protein L19
												AAP17993.1	grpE	0.980443	3.79626e-12	heat shock protein GrpE
												AAP17887.1	hisS	0.978645	3.88528e-12	histidine tRNA synthetase
												AAP16226.1	cds677	0.97785	2.11773e-09	putative minor tail protein
												AAP19090.1	cds3541	0.977277	2.55838e-08	IS1 orfB
												AAP16742.1	oppA	0.977149	3.87831e-12	periplasmic oligopeptide binding protein
												AAP17987.1	trmD	0.976533	3.99887e-12	tRNA methyltransferase%3B tRNA (guanine-7-)-methyltransferase
												AAP18941.1	atpF	0.976456	4.34278e-12	membrane-bound ATP synthase%2C F0 sector%2C subunit b
												AAP17571.1	mglC	0.976033	9.33667e-11	methyl-galactoside transport system permease protein
												AAP16817.1	ycjX	0.975701	6.8556e-12	putative nzyme
												AAP18620.1	yjbN	0.974824	7.13328e-12	hypothetical protein
												AAP17623.1	napB	0.974247	1.57309e-07	cytochrome c-type protein
												AAP19300.1	yrfG	0.974161	7.51511e-12	putative phosphatase
												AAP19091.1	yibD	0.973911	2.37219e-10	putative regulator
												AAP18933.1	asnA	0.973893	8.60408e-12	asparagine synthetase A
												AAP16602.1	fabH	0.972577	5.86224e-12	3-oxoacyl-[acyl-carrier-protein] synthase III%3B acetyl CoA ACP transacylase
												AAP18545.1	rpsI	0.969934	5.63551e-12	30S ribosomal subunit protein S9
												AAP16603.1	fabD	0.969027	6.53116e-12	malonyl-CoA-[acyl-carrier-protein] transacylase
												AAP17018.1	cds1469	0.966677	1.28192e-06	hypothetical protein
												AAP18989.1	gyrB	0.966592	6.92094e-12	DNA gyrase subunit B%2C type II topoisomerase
												AAP19054.1	recG	0.966152	7.62693e-12	DNA helicase
												AAP17951.1	lepB	0.965374	8.40007e-12	leader peptidase (signal peptidase I)
												AAP19568.1	yjiY	0.964139	1.17405e-11	putative carbon starvation protein
												AAP18858.1	yigM	0.960026	1.51082e-11	hypothetical protein
												AAP19378.1	rpsE	0.959098	9.43008e-12	30S ribosomal subunit protein S5
												AAP15894.1	yajK	0.957147	1.60004e-11	putative oxidoreductase
												AAP16423.1	rpsA	0.955502	1.10026e-11	30S ribosomal subunit protein S1
												AAP18374.1	cds2826	0.951993	5.75128e-06	IS2 orfA
												AAP15716.1	rnhB	0.951557	1.93422e-11	RNAse HII
												AAP19275.1	glpG	0.950655	2.63969e-11	protein of glp regulon
												AAP18712.1	rpoB	0.946089	1.74049e-11	RNA polymerase%2C beta subunit
												AAP15679.1	pcnB	0.945956	1.9575e-11	poly(A) polymerase I
												AAP18995.1	yidC	0.944841	1.95643e-11	60 KD inner-membrane protein
												AAP16292.1	cds743	0.944164	3.11914e-11	putative transport system permease protein
												AAP19092.1	yibQ	0.943985	4.08445e-11	hypothetical protein
												AAP19295.1	envZ	0.943212	2.85512e-11	protein histidine kinase/phosphatase sensor for OmpR%2C modulates expression of ompF and ompC
												AAP15642.1	mutT	0.942682	1.15912e-10	7%2C8-dihydro-8-oxoguanine-triphosphatase
												AAP17446.1	cds1895	0.942658	2.35227e-09	IS1 orfB
												AAP16786.1	yciW	0.939529	2.91303e-11	putative oxidoreductase
												AAP18900.1	wecC	0.938075	3.66051e-11	UDP-N-acetyl-D-mannosaminuronic acid dehydrogenase
												AAP15802.1	cds254	0.937901	6.67381e-08	hypothetical protein
												AAP19185.1	yhiE	0.936286	1.71637e-07	hypothetical protein
												AAP19098.1	gpsA	0.933309	3.73016e-11	glycerol-3-phosphate dehydrogenase (NAD+)
												AAP19362.1	rplD	0.931938	3.48926e-11	50S ribosomal subunit protein L4
												AAP19381.1	prlA	0.93183	3.43575e-11	putative ATPase subunit of translocase
												AAP18559.1	yhdP	0.931629	4.40667e-11	hypothetical protein
												AAP19201.1	prlC	0.92728	4.87192e-11	oligopeptidase A
												AAP16259.1	rhlE	0.921405	7.90793e-11	putative ATP-dependent RNA helicase
												AAP17645.1	gyrA	0.920126	6.20886e-11	DNA gyrase%2C subunit A%2C type II topoisomerase
												AAP18490.1	infB	0.919558	6.28075e-11	protein chain initiation factor IF-2
												AAP16847.1	ydbK	0.918243	9.47594e-11	putative oxidoreductase%2C Fe-S subunit
												AAP17121.1	cds1572	0.918166	1.10799e-10	hypothetical protein
												AAP17611.1	yejM	0.918162	7.25217e-11	putative sulfatase
												AAP17616.1	ccmF	0.914623	4.47797e-09	cytochrome c-type biogenesis protein
												AAP17624.1	napH	0.914523	1.56107e-07	ferredoxin-type protein
												AAP16155.1	rlpA	0.914191	9.24958e-11	minor lipoprotein
												AAP15661.1	speD	0.912593	9.52635e-11	S-adenosylmethionine decarboxylase
												AAP17378.1	cds1827	0.911388	2.93738e-06	ISEhe3 orfA
												AAP19253.1	ugpA	0.910835	2.10649e-08	sn-glycerol 3-phosphate transport protein%2C integral membrane protein
												AAP19125.1	avtA	0.909124	1.10293e-10	alanine-alpha-ketoisovalerate/valine-pyruvate transaminase C
												AAP16845.1	ydaO	0.908674	1.69692e-10	hypothetical protein
												AAP15633.1	murG	0.908617	1.31938e-10	UDP-N-acetylglucosamine:N-acetylmuramyl- (pentapeptide) pyrophosphoryl-undecaprenol N-acetylglucosamine transferase
												AAP19066.1	dut	0.908452	1.69453e-10	deoxyuridinetriphosphatase
												AAP16153.1	mrdA	0.907504	1.28225e-10	peptidoglycan synthetase%3B penicillin-binding protein 2
												AAP17254.1	yebC	0.905283	1.42763e-10	hypothetical protein
												AAP16316.1	potI	0.905188	7.29233e-10	putrescine transport protein%3B permease
												AAP17242.1	edd	0.905065	2.84577e-10	6-phosphogluconate dehydratase
												AAP16614.1	ycfL	0.904787	2.82647e-10	hypothetical protein
												AAP16791.1	sapC	0.903914	2.92373e-10	peptide transport permease protein
												AAP18823.1	glnA	0.902402	1.40697e-10	glutamine synthetase
												AAP17575.1	yeiB	0.901889	3.3723e-10	hypothetical protein
												AAP16087.1	sucB	0.901053	1.46935e-10	2-oxoglutarate dehydrogenase (dihydrolipoyltranssuccinase E2 component)
												AAP17125.1	ydgQ	0.898976	4.3792e-10	hypothetical protein
												AAP18874.1	yigB	0.898202	4.07991e-10	putative phosphatase
												AAP19254.1	ugpE	0.897051	3.30373e-08	sn-glycerol 3-phosphate transport protein%2C integral membrane protein
												AAP17789.1	cysK	0.896114	1.82767e-10	cysteine synthase A%2C O-acetylserine sulfhydrolase A
												AAP19482.1	cycA	0.894863	3.0706e-10	transport protein for D-alanine%2C D-serine%2C and glycine
												AAP17716.1	hisJ	0.892909	2.31473e-10	histidine-binding periplasmic protein of high-affinity histidine transport system
												AAP16962.1	ydjY	0.892781	7.2181e-09	hypothetical protein
												AAP18263.1	mutY	0.891554	3.99984e-10	adenine glycosylase
												AAP16613.1	ycfF	0.890218	4.93953e-10	hypothetical protein
												AAP18690.1	iclR	0.890002	1.29249e-09	repressor of aceBA operon
												AAP16762.1	trpB	0.889898	2.80798e-10	tryptophan synthase%2C beta protein
												AAP19069.1	rpmB	0.889823	2.49912e-10	50S ribosomal subunit protein L28
												AAP16348.1	infA	0.888979	2.94809e-10	protein chain initiation factor IF-1
												AAP18824.1	glnL	0.887154	1.02853e-09	histidine protein kinase sensor for GlnG regulator (nitrogen regulator II%2C NRII)
												AAP19065.1	ttk	0.886435	5.19843e-10	putative transcriptional regulator
												AAP18486.1	pnp	0.885919	2.94895e-10	polynucleotide phosphorylase
												AAP18506.1	rplU	0.885135	3.07333e-10	50S ribosomal subunit protein L21
												AAP15618.1	ilvI	0.884107	3.30298e-10	acetolactate synthase III%2C large subunit
												AAP16290.1	cds741	0.882833	3.86994e-10	putative transport protein
												AAP18917.1	ilvG	0.882584	3.7202e-10	acetolactate synthase II%2C large subunit
												AAP18369.1	ygiC	0.881729	3.79806e-10	putative synthetase/amidase
												AAP18237.1	yqgC	0.881067	7.29976e-10	hypothetical protein
												AAP19093.1	yibP	0.880392	5.96008e-10	putative membrane protein
												AAP17534.1	yehP	0.879924	1.03353e-09	hypothetical protein
												AAP16122.1	glnS	0.879291	6.09899e-10	glutamine tRNA synthetase
												AAP19021.1	phoU	0.879037	5.83743e-10	negative regulator for pho regulon and putative enzyme in phosphate metabolism
												AAP18138.1	ygdL	0.878112	1.73804e-09	putative enzyme
												AAP17335.1	yecA	0.877652	9.69566e-10	hypothetical protein
												AAP18252.1	yggW	0.876296	6.4263e-10	putative oxidase
												AAP18488.1	truB	0.874158	6.41456e-10	tRNA pseudouridine 5S synthase
												AAP19276.1	glpR	0.873631	9.86889e-10	repressor of the glp operon
												AAP18002.1	cds2454	0.872997	0.00118717	IS3 orfA
												AAP18713.1	rplL	0.872519	5.33946e-10	50S ribosomal subunit protein L7/L12
												AAP17576.1	folE	0.871803	6.54885e-10	GTP cyclohydrolase I
												AAP17546.1	cds1999	0.869958	5.18634e-05	putative phage tail fiber protein
												AAP19309.1	aroB	0.869887	6.44888e-10	3-dehydroquinate synthase
												AAP16604.1	fabG	0.869338	6.42219e-10	3-oxoacyl-[acyl-carrier-protein] reductase
												AAP18876.1	yigA	0.86863	1.19673e-09	hypothetical protein
												AAP19338.1	yhfK	0.868076	7.7666e-10	hypothetical protein
												AAP19137.1	cds3588	0.868005	3.45211e-06	IS1 orfB
												AAP16601.1	plsX	0.864856	8.0568e-10	PlsX protein
												AAP15709.1	yaeL	0.862641	9.25549e-10	hypothetical protein
												AAP15728.1	yaeB	0.862251	2.39862e-09	hypothetical protein
												AAP17834.1	ypfI	0.861834	1.08428e-09	hypothetical protein
												AAP16129.1	yleA	0.861646	1.03171e-09	hypothetical protein
												AAP16147.1	rlpB	0.859654	1.1869e-09	minor lipoprotein
												AAP18875.1	xerC	0.857711	1.6712e-09	site-specific recombinase
												AAP16045.1	rnk	0.857266	2.31824e-09	regulator of nucleoside diphosphate kinase
												NP_858245.1	cds4158	0.853803	5.61618e-09	ISSfl4 ORF3
												AAP18631.1	cds3082	0.853388	1.1049e-08	IS1 orfB
												AAP18042.1	mltB	0.852089	2.55644e-09	membrane-bound lytic murein transglycosylase B
												AAP19606.1	cds4056	0.850957	3.09234e-07	hypothetical protein
												AAP16763.1	trpC	0.850155	1.76432e-09	N-(5-phosphoribosyl)anthranilate isomerase and indole-3-glycerolphosphate synthetase
												AAP18157.1	ygeD	0.850026	2.76846e-09	putative resistance proteins
												AAP16904.1	cds1355	0.847364	1.6421e-08	hypothetical protein
												AAP15708.1	cdsA	0.847004	2.08675e-09	CDP-diglyceride synthetase
												AAP18822.1	yihK	0.846592	1.68803e-09	putative GTP-binding factor
												AAP18571.1	panF	0.846246	3.87871e-09	sodium/pantothenate symporter
												AAP16032.1	cstA	0.845991	1.98476e-09	carbon starvation protein
												AAP16271.1	glnP	0.845962	2.31144e-09	glutamine transport protein GlnP
												AAP15593.1	apaG	0.843901	2.50175e-09	hypothetical protein
												AAP19384.1	rpsK	0.843517	1.98508e-09	30S ribosomal subunit protein S11
												AAP17676.1	menD	0.839727	4.1867e-09	2-oxoglutarate decarboxylase%3B SHCHC synthase
												AAP17673.1	menC	0.838261	4.26546e-09	O-succinylbenzoyl-CoA synthase
												AAP18239.1	metK	0.836569	2.58725e-09	methionine adenosyltransferase 1 (AdoMet synthetase)
												AAP17957.1	yfiC	0.836033	8.3925e-09	putative enzyme
												AAP17992.1	yfjD	0.835795	6.20281e-09	putative transport protein
												AAP17835.1	cds2287	0.835412	3.519e-09	hypothetical protein
												AAP19063.1	rph	0.835262	4.82286e-09	RNase PH
												AAP18229.1	tktA	0.833601	3.0445e-09	transketolase 1 isozyme
												AAP18388.1	ygiH	0.830461	6.68753e-09	hypothetical protein
												AAP15678.1	folK	0.830231	5.40689e-09	7%2C 8-dihydro-6-hydroxymethylpterin-pyrophosphokinase
												AAP19377.1	rplR	0.830231	3.40005e-09	50S ribosomal subunit protein L18
												AAP15594.1	ksgA	0.829925	3.81534e-09	S-adenosylmethionine-6-N%2CN-adenosyl (rRNA) dimethyltransferase
												AAP18513.1	vpsC	0.829532	6.22674e-09	cytoplasmic membrane protein
												AAP16276.1	ybiP	0.828707	4.73715e-09	putative enzyme
												AAP15595.1	pdxA	0.828666	3.95159e-09	pyridoxal phosphate biosynthetic protein PdxA
												AAP16270.1	glnQ	0.828632	4.67345e-09	ATP-binding component of glutamine high-affinity transport system
												AAP16658.1	ycfB	0.826818	4.24929e-09	hypothetical protein
												AAP18351.1	sufI	0.824675	5.42309e-09	suppressor of ftsI
												AAP18203.1	ygfA	0.824026	5.13065e-09	putative ligase
												AAP17907.1	hcaT	0.822944	9.68952e-09	MFS (major facilitator superfamily) transporter
												AAP19529.1	hflK	0.822776	4.80748e-09	protease specific for phage lambda cII repressor
												AAP19079.1	waaL	0.81713	1.44779e-08	UDP-D-galactose:(glucosyl)lipopolysaccharide- alpha-1%2C3-D-galactosyltransferase
												AAP19080.1	waaY	0.814954	1.64282e-08	putative LPS biosynthesis protein
												AAP18940.1	atpE	0.814508	7.03114e-09	membrane-bound ATP synthase%2C F0 sector%2C subunit c
												AAP15889.1	thiL	0.813852	1.29212e-08	thiamin-monophosphate kinase
												AAP19499.1	yjeH	0.81357	9.96968e-09	putative transport protein
												AAP16427.1	ycaQ	0.812947	1.75229e-08	hypothetical protein
												AAP16463.1	uup	0.812017	8.5411e-09	putative ATP-binding component of a transport system
												AAP19245.1	livJ	0.810861	8.33029e-09	high-affinity amino acid transport protein%2C periplasmic binding protein
												AAP15717.1	dnaE	0.810146	8.50714e-09	DNA polymerase III%2C alpha subunit
												AAP19433.1	yjgR	0.809786	2.38442e-07	hypothetical protein
												AAP16080.1	cydB	0.809581	8.50601e-09	cytochrome d terminal oxidase polypeptide subunit II
												AAP18491.1	nusA	0.809579	8.17445e-09	transcription pausing%3B L factor
												AAP18149.1	thyA	0.807897	1.10054e-08	thymidylate synthetase
												AAP18901.1	wecB	0.80376	1.32461e-08	UDP-N-acetyl glucosamine-2-epimerase
												AAP19097.1	secB	0.802071	1.21628e-08	molecular chaperone in protein export
												AAP16997.1	pheS	0.801879	1.17896e-08	phenylalanine tRNA synthetase%2C alpha-subunit
												AAP17735.1	mepA	0.801731	1.29278e-08	murein DD-endopeptidase
												AAP17824.1	cds2276	0.800586	1.23717e-08	putative multimodular enzyme
												AAP19467.1	ppa	0.800585	1.28972e-08	inorganic pyrophosphatase
												AAP17463.1	rfbJ	0.798812	3.71565e-08	glycosyl transferase
												AAP17181.1	ydiJ	0.796844	1.4052e-08	putative oxidase
												AAP17462.1	cds1911	0.796784	4.33341e-08	hypothetical protein
												AAP16280.1	ybiT	0.79494	1.58024e-08	putative ATP-binding component of a transport system
												AAP18738.1	argE	0.79321	1.96434e-08	acetylornithine deacetylase
												AAP17573.1	mglB	0.792064	2.35592e-08	galactose-binding transport protein%3B receptor for galactose taxis
												AAP17253.1	ruvC	0.791834	2.11161e-08	Holliday junction nuclease
												AAP19146.1	cds3597	0.789984	1.09457e-05	IS150 putative transposase
												AAP16441.1	ompF	0.788955	1.88155e-08	outer membrane protein 1a (Ia%3Bb%3BF)
												AAP19306.1	yrfB	0.788467	6.42709e-06	hypothetical protein
												AAP16406.1	cds858	0.78709	4.26307e-06	hypothetical bacteriophage protein
												AAP16181.1	cds632	0.786701	2.82196e-07	IS2 orfA
												AAP17806.1	cds2258	0.785942	9.16004e-08	hypothetical protein
												AAP18714.1	rplJ	0.784058	2.28165e-08	50S ribosomal subunit protein L10
												AAP17885.1	cds2337	0.78346	2.54693e-08	putative dehydrogenase
												AAP17246.1	msbB	0.782754	2.84311e-08	suppressor of htrB%2C heat shock protein
												AAP18886.1	hemX	0.781885	2.92743e-08	uroporphyrinogen III methylase
												AAP19363.1	rplW	0.779056	2.83228e-08	50S ribosomal subunit protein L23
												AAP19376.1	rplF	0.778584	2.8541e-08	50S ribosomal subunit protein L6
												AAP15644.1	yacG	0.778397	7.48747e-08	hypothetical protein
												AAP18142.1	recD	0.7783	3.44764e-08	DNA helicase%2C ATP-dependent dsDNA/ssDNA exonuclease V subunit%2C ssDNA endonuclease
												AAP18126.1	fucO	0.777989	4.66591e-08	L-1%2C2-propanediol oxidoreductase
												AAP15600.1	hepA	0.777275	3.89882e-08	probable ATP-dependent RNA helicase
												AAP15620.1	fruL	0.776362	1.24096e-07	fruR leader peptide
												AAP18908.1	gppA	0.776162	3.41172e-08	guanosine pentaphosphatase%2C exopolyphosphatase
												AAP16204.1	ybcQ	0.775115	6.14312e-07	putative Q protein
												AAP18965.1	ilvN	0.773468	5.12761e-08	acetolactate synthase I%2C valine sensitive%2C small subunit
												AAP15859.1	proC	0.772412	5.50028e-08	pyrroline-5-carboxylate reductase
												AAP16629.1	ycfW	0.771441	4.40715e-08	putative kinase
												AAP16628.1	ycfV	0.770958	5.31266e-08	putative ATP-binding component of a transport system
												AAP19136.1	glyS	0.770341	4.15968e-08	glycine tRNA synthetase%2C beta subunit
												AAP18859.1	yigL	0.768705	8.47566e-08	hypothetical protein
												AAP16705.1	ychF	0.767733	5.02026e-08	putative GTP-binding protein
												AAP17097.1	cds1548	0.767099	2.76291e-07	putative arginine/ornithine antiporter
												AAP19296.1	pckA	0.766934	4.95516e-08	phosphoenolpyruvate carboxykinase
												AAP15707.1	yaeS	0.766656	5.15366e-08	hypothetical protein
												AAP18894.1	yifM	0.765685	9.53495e-08	4-alpha-l-fucosyltransferase
												AAP19007.1	yieG	0.765016	5.79258e-08	putative membrane / transport protein
												AAP19397.1	iadA	0.764402	7.73144e-08	isoaspartyl dipeptidase
												AAP19353.1	yheL	0.764389	9.06632e-08	hypothetical protein
												AAP17374.1	yedA	0.764211	2.70416e-07	putative transmembrane subunit
												AAP15798.1	tauA	0.763825	3.83767e-07	taurine transport system periplasmic protein
												AAP19095.1	yibN	0.763184	6.72874e-08	hypothetical protein
												AAP19247.1	livK	0.76307	5.60753e-08	high-affinity leucine-specific transport protein%2C periplasmic binding protein
												AAP15918.1	lon	0.762133	5.58349e-08	DNA-binding%2C ATP-dependent protease La%3B heat shock K-protein
												AAP15734.1	yafB	0.761797	1.54997e-07	putative aldose reductase
												AAP19022.1	pstB	0.758316	8.4254e-08	ATP-binding component of high-affinity phosphate-specific transport system
												AAP19361.1	rplC	0.756237	6.93712e-08	50S ribosomal subunit protein L3
												AAP19530.1	hflC	0.755881	7.44938e-08	protease specific for phage lambda cII repressor
												AAP19205.1	pitA	0.755751	9.53332e-08	low-affinity phosphate transport protein
												AAP16150.1	phpB	0.753092	1.79934e-07	Phpb
												AAP19439.1	yjgN	0.752722	6.60833e-07	hypothetical protein
												AAP16062.1	galE	0.751325	1.21228e-07	UDP-galactose-4-epimerase
												AAP19375.1	rpsH	0.750508	8.76993e-08	30S ribosomal subunit protein S8%2C and regulator
												AAP18343.1	metC	0.749127	1.12393e-07	cystathionine beta-lyase (beta-cystathionase)
												AAP16766.1	trpL	0.748626	4.84999e-06	trp operon leader peptide
												AAP17597.1	cds2050	0.748604	1.7615e-07	hypothetical protein
												AAP15982.1	arcC	0.746134	2.09673e-07	putative carbamate kinase
												AAP18842.1	fadA	0.744895	1.42041e-07	thiolase I%2C 3-ketoacyl-CoA thiolase%2C acetyl-CoA transferase
												AAP19360.1	rpsJ	0.74432	1.1145e-07	30S ribosomal subunit protein S10
												AAP16599.1	yceD	0.744066	1.12217e-07	hypothetical protein
												AAP18382.1	glnE	0.743742	1.27819e-07	adenylylating enzyme for glutamine synthetase
												AAP16260.1	ybiA	0.74371	6.85963e-07	hypothetical protein
												AAP17304.1	argS	0.743303	1.28302e-07	arginine tRNA synthetase
												AAP18183.1	lysS	0.742331	1.24567e-07	lysine tRNA synthetase
												AAP18857.1	metR	0.741701	1.57373e-07	regulator for metE and metH
												AAP18038.1	alaS	0.741411	1.24413e-07	alanyl-tRNA synthetase
												AAP17840.1	hyfA	0.741318	3.87736e-06	hydrogenase 4 Fe-S subunit
												AAP19314.1	trpS	0.740948	1.38714e-07	tryptophan tRNA synthetase
												AAP18361.1	parE	0.740641	1.35952e-07	DNA topoisomerase IV subunit B
												AAP18939.1	atpB	0.73997	1.34836e-07	membrane-bound ATP synthase%2C F0 sector%2C subunit a
												AAP18478.1	yhbS	0.739125	1.76262e-07	hypothetical protein
												AAP16627.1	ycfU	0.738931	1.62905e-07	hypothetical protein
												AAP18847.1	yigU	0.738599	1.76822e-07	hypothetical protein
												AAP19371.1	rplN	0.738202	1.39983e-07	50S ribosomal subunit protein L14
												AAP18586.1	yrdC	0.737075	1.84582e-07	hypothetical protein
												AAP18251.1	yggV	0.736658	1.96081e-07	putative ribosomal protein
												AAP15643.1	cds95	0.734881	4.41464e-07	hypothetical protein
												AAP15983.1	purK	0.733997	1.78468e-07	phosphoribosylaminoimidazole carboxylase%3B AIR carboxylase%2C CO(2)-fixing subunit
												AAP19082.1	waaD	0.733793	2.57508e-07	lipopolysaccharide 1%2C2-N- acetylglucosaminetransferase
												AAP17958.1	srmB	0.733321	2.02037e-07	ATP-dependent RNA helicase
												AAP15919.1	hupB	0.733115	1.76274e-07	DNA-binding protein HU-beta%2C NS1 (HU-1)
												AAP19327.1	yhfL	0.732059	2.35968e-05	hypothetical protein
												AAP18353.1	parC	0.730664	2.04684e-07	DNA topoisomerase IV subunit A
												AAP17756.1	emrK	0.729938	5.87771e-06	multidrug resistance protein K
												AAP18829.1	polA	0.729092	2.1407e-07	DNA polymerase I
												AAP19243.1	ftsX	0.728992	2.55134e-07	cell division membrane protein
												AAP16764.1	trpD	0.728958	2.32044e-07	anthranilate synthase component II%2C glutamine amidotransferase and phosphoribosylanthranilate transferase
												AAP19070.1	rpmG	0.728818	2.18343e-07	50S ribosomal subunit protein L33
												AAP18896.1	wecE	0.728066	3.44961e-07	putative regulator
												AAP15890.1	pgpA	0.725876	6.83486e-07	phosphatidylglycerophosphatase
												AAP19078.1	waaP	0.725455	4.3984e-07	lipopolysaccharide core biosynthesis protein
												AAP16874.1	cds1325	0.725238	8.14995e-07	hypothetical protein
												AAP19492.1	cds3942	0.724954	0.00475678	IS1 orfB
												AAP15845.1	cds296	0.723915	5.55936e-07	hypothetical protein
												AAP16900.1	yebH	0.723764	3.32793e-07	putative enzyme
												AAP18704.1	yjaD	0.722899	4.02284e-07	hypothetical protein
												AAP18583.1	yrdA	0.721898	3.94491e-07	putative transferase
												AAP19222.1	yhhJ	0.720618	3.25683e-07	putative transporter
												AAP16152.1	ybeA	0.71879	3.62527e-07	hypothetical protein
												AAP17384.1	cds1833	0.718637	0.00562538	IS1 orfB
												AAP18630.1	ssb	0.717293	3.74913e-07	ssDNA-binding protein
												AAP17634.1	ompC	0.715627	3.25342e-07	outer membrane protein 1b (Ib%3Bc)
												AAP17116.1	add	0.715478	4.74315e-07	adenosine deaminase
												AAP15631.1	murD	0.715128	3.89516e-07	UDP-N-acetylmuramoylalanine-D-glutamate ligase
												AAP18362.1	yqiA	0.714423	4.19819e-07	hypothetical protein
												AAP18118.1	cds2570	0.713364	6.89481e-06	hypothetical protein
												AAP18406.1	ygjL	0.7125	4.71377e-07	putative NADPH dehydrogenase
												AAP16792.1	sapB	0.711571	6.18695e-07	peptide transport permease protein
												AAP19372.1	rplX	0.711003	3.93132e-07	50S ribosomal subunit protein L24
												AAP18731.1	cds3182	0.710323	0.0142728	IS1 orfB
												AAP19563.1	cds4013	0.70962	7.27895e-07	hypothetical protein
												AAP16289.1	cds740	0.709085	4.39584e-07	putative ATP-binding component of a transport system
												AAP18948.1	glmS	0.708372	4.49085e-07	L-glutamine:D-fructose-6-phosphate aminotransferase
												AAP19081.1	waaJ	0.707639	7.83445e-07	putative UDP-glucose:(galactosyl) LPS alpha1%2C2-glucosyltransferase
												AAP15619.1	ilvH	0.707558	4.97832e-07	acetolactate synthase III%2C small subunit
												AAP17470.1	rfbA	0.706683	5.16588e-07	glucose-1-phosphate thymidylyltransferase
												AAP18718.1	secE	0.704719	5.34593e-07	preprotein translocase
												AAP17930.1	cds2382	0.704555	3.97007e-06	DNA-invertase
												AAP18964.1	uhpA	0.704077	1.5702e-06	response regulator
												AAP16657.1	ycfC	0.703469	5.93578e-07	hypothetical protein
												AAP16365.1	cds816	0.703301	6.81578e-05	ISSfl3 orfC%2CD
												AAP17354.1	nmpC	0.703242	5.22229e-07	putative outer membrane porin protein C precurser
												AAP19605.1	deoD	0.702854	7.30171e-07	purine-nucleoside phosphorylase
												AAP16898.1	cds1349	0.702816	5.48188e-07	hypothetical protein
												AAP19307.1	hofQ	0.702631	7.86331e-06	putative transport portein
												AAP19263.1	gntU	0.701964	1.26457e-06	low-affinity gluconate transport permease protein
												AAP15628.1	murE	0.698561	6.68937e-07	meso-diaminopimelate-adding enzyme
												AAP17120.1	cds1571	0.698003	8.353e-07	hypothetical protein
												AAP17633.1	yojL	0.697436	1.55338e-06	hypothetical protein
												AAP18238.1	yqgD	0.697326	9.08128e-07	hypothetical protein
												AAP18250.1	yggU	0.696912	1.00717e-06	hypothetical protein
												AAP17605.1	bcr	0.696306	1.12868e-06	bicyclomycin resistance protein%3B transmembrane protein
												AAP18150.1	lgt	0.694703	1.00595e-06	phosphatidylglycerol-prolipoprotein diacylglyceryl transferase%3B a major membrane phospholipid
												AAP15946.1	apt	0.692276	9.71254e-07	adenine phosphoribosyltransferase
												AAP16041.1	ahpF	0.691575	8.49685e-07	alkyl hydroperoxide reductase%2C F52a subunit
												AAP17443.1	yeeF	0.691574	1.09522e-06	putative amino acid/amine transport protein
												AAP16624.1	mfd	0.690862	8.54583e-07	transcription-repair coupling factor
												AAP18937.1	gidB	0.690402	1.54622e-06	glucose-inhibited division protein GidB
												AAP18715.1	rplA	0.690079	8.41602e-07	50S ribosomal subunit protein L1
												AAP18085.1	ygbP	0.68951	1.08077e-06	hypothetical protein
												AAP18716.1	rplK	0.689431	8.69888e-07	50S ribosomal subunit protein L11
												AAP17809.1	yfeG	0.689104	2.7489e-06	putative ARAC-type regulatory protein
												AAP19297.1	yhgE	0.687024	2.42053e-06	putative transport protein
												AAP18505.1	rpmA	0.685101	1.03319e-06	50S ribosomal subunit protein L27
												AAP19364.1	rplB	0.685034	1.00676e-06	50S ribosomal subunit protein L2
												AAP16656.1	purB	0.684634	1.10292e-06	adenylosuccinate lyase
												AAP17096.1	cds1547	0.68373	1.20067e-06	hypothetical protein
												AAP18730.1	oxyR	0.683573	1.20622e-06	activator of hydrogen peroxide-inducible genes OxyR
												AAP17779.1	cds2231	0.682005	6.25939e-06	hypothetical protein
												AAP18932.1	yieM	0.681547	1.54667e-06	hypothetical protein
												AAP18711.1	rpoC	0.681156	1.15766e-06	RNA polymerase%2C beta prime subunit
												AAP17341.1	yecC	0.681085	1.66353e-06	putative ATP-binding component of a transport system
												AAP16335.1	ybjE	0.680982	2.254e-06	putative surface protein
												AAP18025.1	proV	0.680869	1.27746e-06	glycine betaine/L-proline transport ATP-binding protein
												AAP17610.1	yejL	0.680039	1.51698e-06	hypothetical protein
												AAP18844.1	yigC	0.679754	1.33021e-06	putative oxidoreductase
												AAP15704.1	pyrH	0.678653	1.42075e-06	uridylate kinase
												AAP15703.1	tsf	0.678565	1.29015e-06	protein chain elongation factor EF-Ts
												AAP15969.1	ybbN	0.677622	1.45006e-06	putative thioredoxin-like protein
												AAP15710.1	yaeT	0.677471	1.32896e-06	hypothetical protein
												AAP18547.1	yhcM	0.677152	1.62757e-06	hypothetical protein
												AAP16899.1	cspC	0.672586	1.61988e-06	cold shock protein
												AAP16101.1	ybgJ	0.671811	1.85279e-06	putative carboxylase
												AAP17718.1	ubiX	0.671219	2.33873e-06	3-octaprenyl-4-hydroxybenzoate carboxy-lyase
												AAP15715.1	lpxB	0.670858	1.78227e-06	tetraacyldisaccharide-1-P
												AAP19012.1	cds3463	0.670043	0.00015356	ISSfl3 orfC
												AAP17542.1	yehU	0.669681	2.72211e-06	putative 2-component sensor protein
												AAP16499.1	ymcB	0.669677	9.7456e-06	hypothetical protein
												NP_858324.1	cds4235	0.669566	3.01022e-06	ISSfl1 ORF2
												AAP19310.1	damX	0.668359	1.88735e-06	putative membrane protein
												AAP18095.1	ygcM	0.667411	8.34004e-06	putative 6-pyruvoyl tetrahydrobiopterin synthase
												AAP16263.1	ybiC	0.667279	1.93814e-06	putative dehydrogenase
												AAP18470.1	yraN	0.667211	2.8148e-06	hypothetical protein
												AAP18031.1	emrR	0.667058	2.19657e-06	regulator of plasmid mcrB operon (microcin B17 synthesis)
												AAP19096.1	grxC	0.666846	2.23964e-06	glutaredoxin 3
												AAP17786.1	lig	0.665825	2.62186e-06	DNA ligase
												AAP18676.1	yjdH	0.665353	2.45637e-06	putative 2-component sensor protein
												AAP16151.1	ybeB	0.665278	2.48705e-06	hypothetical protein
												AAP16844.1	dbpA	0.664383	3.55652e-06	ATP-dependent RNA helicase
												AAP18863.1	recQ	0.663233	2.54481e-06	ATP-dependent DNA helicase
												AAP19382.1	rpmJ	0.662298	2.34329e-06	50S ribosomal subunit protein L36
												AAP16940.1	cds1391	0.661231	5.42866e-05	putative oxidoreductase
												AAP16396.1	ybhC	0.660888	3.0183e-06	putative pectinesterase
												AAP16136.1	gltK	0.660804	7.42884e-06	glutamate/aspartate transport system permease
												AAP17967.1	pssA	0.658977	2.69705e-06	phosphatidylserine synthase
												AAP15591.1	folA	0.658287	6.86201e-06	dihydrofolate reductase type I
												AAP18127.1	fucA	0.658093	1.55073e-05	L-fuculose-1-phosphate aldolase
												AAP17746.1	fadL	0.657902	4.37517e-06	transport of long-chain fatty acids
												AAP18703.1	hemE	0.656128	3.15677e-06	uroporphyrinogen decarboxylase
												AAP19085.1	rfaF	0.655861	3.08061e-06	ADP-heptose--lps heptosyltransferase II
												AAP19452.1	pyrI	0.655525	5.03934e-06	aspartate carbamoyltransferase%2C regulatory subunit
												AAP15805.1	ykgE	0.654656	7.0118e-06	putative dehydrogenase subunit
												AAP16313.1	potF	0.654327	4.03885e-06	periplasmic putrescine-binding protein%3B permease protein
												AAP19124.1	yiaI	0.654073	4.81415e-06	hypothetical protein
												AAP17555.1	yehW	0.652352	9.26939e-06	putative transport system permease protein
												AAP18041.1	ygaD	0.651617	6.70857e-06	hypothetical protein
												AAP16227.1	cds678	0.651245	1.75406e-05	minor tail protein
												AAP16093.1	sdhC	0.65101	3.60931e-06	succinate dehydrogenase%2C cytochrome b556
												AAP15613.1	leuC	0.649707	3.51052e-06	3-isopropylmalate isomerase (dehydratase) subunit
												AAP16261.1	dinG	0.649387	4.33876e-06	probable ATP-dependent helicase
												AAP15739.1	dniR	0.649344	3.60013e-06	transcriptional regulator for nitrite reductase (cytochrome c552)
												AAP15621.1	fruR	0.648767	4.07012e-06	transcriptional repressor of fru operon and others
												AAP16765.1	trpE	0.646719	4.43758e-06	anthranilate synthase component I
												AAP18912.1	ilvY	0.646108	5.81602e-06	ilvC positive regulator
												AAP17160.1	cds1609	0.645967	4.7533e-06	possible enzyme
												AAP19305.1	yrfC	0.64547	0.000101912	hypothetical protein
												AAP15913.1	yajG	0.643091	5.31535e-06	putative polymerase/proteinase
												AAP17974.1	clpB	0.642777	4.47622e-06	heat shock protein
												AAP15608.1	yabK	0.642124	5.99416e-06	putative transport system permease protein
												AAP18992.1	dnaA	0.641992	4.74394e-06	replication initiation protein DnaA
												AAP18084.1	ygbB	0.640343	6.76468e-06	hypothetical protein
												AAP16789.1	sapF	0.63995	7.04749e-06	putative ATP-binding protein of peptide transport system
												AAP19374.1	rpsN	0.639635	4.91295e-06	30S ribosomal subunit protein S14
												AAP18198.1	visC	0.639582	6.0825e-06	hypothetical protein
												AAP18457.1	cds2908	0.639015	5.94406e-05	IS1 orfA
												AAP18030.1	ygaH	0.638741	6.86986e-06	hypothetical protein
												AAP19076.1	waaQ	0.638228	6.35235e-06	lipopolysaccharide core biosynthesis protein
												AAP17126.1	nth	0.63799	1.07533e-05	endonuclease III
												AAP15641.1	secA	0.637499	5.38513e-06	preprotein translocase%3B secretion protein
												AAP17948.1	recO	0.636641	7.24617e-06	RecO protein
												AAP18592.1	sun	0.636487	6.03228e-06	hypothetical protein
												AAP19622.1	lasT	0.636088	1.18637e-05	hypothetical protein
												AAP19252.1	ugpB	0.635841	9.18539e-06	sn-glycerol 3-phosphate transport protein%2C periplasmic binding protein
												AAP19053.1	gltS	0.635362	7.08776e-06	glutamate transport protein
												AAP19343.1	yheT	0.634268	8.25104e-06	hypothetical protein
												AAP18413.1	ygjT	0.634129	1.22741e-05	putative transport protein
												AAP16092.1	sdhD	0.633966	7.14182e-06	succinate dehydrogenase%2C hydrophobic subunit
												AAP17672.1	menE	0.633697	8.81004e-06	O-succinylbenzoate-CoA ligase
												AAP18880.1	cds3331	0.633081	0.00322487	IS1 orfB
												AAP18843.1	ubiB	0.632849	7.29434e-06	ferrisiderophore reductase%2C flavin reductase (NADPH:flavin oxidoreductase)
												AAP19498.1	cds3948	0.632626	8.62145e-06	hypothetical protein
												AAP15972.1	ybbB	0.632268	1.65106e-05	putative capsule anchoring protein
												AAP18747.1	katG	0.632025	6.56508e-06	catalase%3B hydroperoxidase HPI(I)
												AAP16044.1	cds495	0.631558	1.08821e-05	hypothetical protein
												AAP18717.1	nusG	0.630408	7.09373e-06	component in transcription antitermination
												AAP19308.1	aroK	0.630182	7.19814e-06	shikimate kinase I
												AAP15883.1	tsx	0.630023	7.58091e-06	outer membrane protein Tsx
												AAP17626.1	napA	0.629897	1.61507e-05	probable nitrate reductase 3
												AAP15984.1	purE	0.629741	7.56228e-06	phosphoribosylaminoimidazole carboxylase%3B AIR carboxylase%2C catalytic subunit
												AAP19188.1	hdeB	0.629316	0.00010949	hypothetical protein
												AAP19517.1	yjeP	0.628902	8.16822e-06	putative periplasmic binding protein
												AAP19154.1	tag	0.62766	2.46013e-05	3-methyl-adenine DNA glycosylase I
												AAP17148.1	rnt	0.627543	9.99147e-06	RNase T
												AAP19062.1	yicC	0.626995	9.13496e-06	putative alpha helix protein
												AAP17127.1	ydgR	0.626328	9.17424e-06	putative transport protein
												AAP17625.1	napG	0.62606	0.000202279	ferredoxin-type protein
												AAP15563.1	nhaA	0.625523	1.10651e-05	Na+/H+ antiporter
												AAP16998.1	pheT	0.624051	8.36011e-06	phenylalanine tRNA synthetase%2C beta-subunit
												AAP15650.1	ppdD	0.623533	0.000563895	prelipin peptidase dependent protein
												AAP15926.1	mdlA	0.620696	1.86673e-05	ATP-binding component of a transport system
												AAP18431.1	yhaJ	0.618971	1.60769e-05	putative LYSR-type transcriptional regulator
												AAP19057.1	rpoZ	0.618503	1.11576e-05	RNA polymerase%2C omega subunit
												AAP17150.1	ydhD	0.615904	1.24408e-05	hypothetical protein
												AAP17044.1	ydeD	0.615731	2.16673e-05	hypothetical protein
												AAP18695.1	purD	0.614922	1.1783e-05	phosphoribosylglycinamide synthetase%2C GAR synthetase
												AAP18139.1	mltA	0.614828	1.4603e-05	membrane-bound lytic murein transglycosylase A
												AAP17372.1	cds1821	0.613081	0.000155104	hypothetical protein
												AAP17010.1	ydiD	0.612622	2.57645e-05	putative ligase/synthetase
												AAP16551.1	mdoH	0.612237	1.24936e-05	membrane glycosyltransferase
												AAP18389.1	ygiP	0.611618	3.41546e-05	putative LYSR-type transcriptional regulator
												AAP16034.1	ybdL	0.611263	1.80253e-05	putative aminotransferase
												AAP15634.1	murC	0.611035	1.3706e-05	L-alanine adding enzyme%2C UDP-N-acetyl-muramate:alanine ligase
												AAP16113.1	potE	0.610293	1.58492e-05	putrescine transport protein
												AAP18368.1	ygiB	0.609577	1.38644e-05	hypothetical protein
												AAP16088.1	sucA	0.60859	1.37457e-05	2-oxoglutarate dehydrogenase (decarboxylase component)
												AAP17650.1	nrdB	0.608154	1.54486e-05	ribonucleoside-diphosphate reductase 1%2C beta subunit%2C B2
												AAP16570.1	yceA	0.607931	1.66241e-05	hypothetical protein
												AAP16600.1	rpmF	0.607683	1.43394e-05	50S ribosomal subunit protein L32
												AAP18324.1	gsp	0.607298	1.73779e-05	glutathionylspermidine synthetase/amidase
												AAP17564.1	yohI	0.607224	4.78343e-05	putative regulator protein
												AAP19246.1	yhhK	0.607037	3.08014e-05	hypothetical protein
												AAP15629.1	murF	0.605694	1.58435e-05	D-alanine:D-alanine-adding enzyme
												AAP16949.1	sppA	0.604946	1.64936e-05	protease IV%2C a signal peptide peptidase
												AAP17180.1	cds1629	0.604112	1.87772e-05	hypothetical protein
												AAP16158.1	lipB	0.60332	2.83609e-05	lipoate biosynthesis protein LipB
												AAP17854.1	purM	0.602441	1.72334e-05	phosphoribosylaminoimidazole synthetase%2C AIR synthetase
												AAP17095.1	pntA	0.60225	1.68731e-05	pyridine nucleotide transhydrogenase%2C alpha subunit
												AAP18841.1	fadB	0.601955	1.8829e-05	4-enzyme protein%2C 3-hydroxyacyl-CoA dehydrogenase%3B 3-hydroxybutyryl-CoA epimerase%3B delta(3)-cis-delta(2)-trans-enoyl-CoA isomerase%3B enoyl-CoA hydratase
												AAP18869.1	corA	0.601155	2.70014e-05	Mg2+ transport%2C system I
												AAP15939.1	acrB	0.600205	1.84265e-05	acriflavine resistance protein
												AAP16132.1	ybeX	0.598124	1.98225e-05	putative transport protein
												AAP18109.1	mazG	0.597701	2.78211e-05	hypothetical protein
												AAP18409.1	ygjO	0.595581	3.11866e-05	putative enzyme
												AAP15887.1	ribH	0.595512	2.30921e-05	riboflavin synthase%2C beta chain
												AAP17339.1	yecF	0.595379	3.87455e-05	hypothetical protein
												AAP17471.1	rfbD	0.595191	2.20239e-05	dTDP-6-deoxy-L-mannose-dehydrogenase
												AAP17017.1	cds1468	0.594597	0.000115321	putative ARAC-type regulatory protein
												AAP16790.1	sapD	0.594073	2.6202e-05	putative ATP-binding protein of peptide transport system
												AAP16350.1	cydC	0.593683	2.47446e-05	ATP-binding component of cytochrome-related transport
												AAP17130.1	tyrS	0.59124	2.44612e-05	tyrosine tRNA synthetase
												AAP19437.1	holC	0.590915	2.80657e-05	DNA polymerase III%2C chi subunit
												AAP18855.1	cds3306	0.590732	2.77682e-05	hypothetical protein
												AAP18924.1	rbsK	0.589447	3.53258e-05	ribokinase
												AAP17376.1	dcm	0.588596	3.11992e-05	DNA cytosine methylase
												AAP15656.1	aceE	0.588264	2.6284e-05	pyruvate dehydrogenase (decarboxylase component)
												AAP18503.1	yhbZ	0.587715	3.91564e-05	putative GTP-binding factor
												AAP16497.1	yccZ	0.585608	8.90629e-05	BexD-like protein
												NP_858156.1	cds4073	0.5856	3.41464e-05	hypothetical protein
												AAP15732.1	abc	0.584937	3.08184e-05	ATP-binding component of a transporter
												AAP17493.1	asmA	0.584237	3.10511e-05	suppressor of ompF assembly mutants
												AAP15718.1	accA	0.584059	3.16633e-05	acetyl CoA carboxylase%2C carboxytransferase component%2C alpha subunit
												AAP17535.1	yehQ	0.584012	3.88229e-05	hypothetical protein
												AAP18923.1	rbsR	0.583779	4.43165e-05	regulator for rbs operon
												AAP19349.1	fkpA	0.583141	3.1489e-05	FKBP-type peptidyl-prolyl cis-trans isomerase (rotamase)
												AAP17204.1	sfcA	0.583045	3.99737e-05	NAD-linked malate dehydrogenase (malic enzyme)
												AAP17536.1	cds1989	0.582598	0.00616874	IS1 orfB
												AAP18570.1	yhdT	0.582435	0.000179276	hypothetical protein
												AAP17342.1	yecS	0.58242	4.19426e-05	putative transport system permease protein (former yecC)
												AAP18795.1	fdoG	0.582334	3.22585e-05	formate dehydrogenase-O%2C major subunit
												AAP16007.1	pheP	0.581873	3.70593e-05	phenylalanine transport protein pheP
												AAP18950.1	lpfA	0.581789	0.000341153	putative major fimbrial subunit
												AAP15662.1	speE	0.581766	3.30434e-05	spermidine synthase%2C putrescine aminopropyltransferase
												AAP18664.1	basR	0.580813	5.20297e-05	transcriptional regulatory protein
												AAP19595.1	yjjG	0.580186	4.42196e-05	putative phosphatase
												AAP15949.1	recR	0.579062	3.93116e-05	recombination protein RecR
												AAP19113.1	selA	0.578468	4.58287e-05	selenocysteine synthase: L-seryl-tRNA (Ser) selenium transferase
												AAP16418.1	serC	0.578053	3.61008e-05	3-phosphoserine aminotransferase
												AAP18887.1	hemY	0.578008	3.80903e-05	HemY protein
												AAP19574.1	hpaH	0.577925	0.000221546	2-oxo-hept-3-ene-1%2C 7-dioate hydratase
												AAP18249.1	yggT	0.577907	4.08764e-05	putative resistance protein
												AAP16344.1	ybjZ	0.577888	4.65084e-05	putative ATP-binding component of a transport system
												AAP17952.1	lepA	0.577757	3.73573e-05	GTP-binding elongation factor
												AAP16891.1	yebJ	0.576587	4.15149e-05	hypothetical protein
												AAP17733.1	cds2185	0.576331	4.33069e-05	putative transporting ATPase
												AAP17469.1	rfbC	0.575525	4.76667e-05	dTDP-6-deoxy-L-mannose-dehydrogenase
												AAP18752.1	yiiX	0.575362	5.57289e-05	hypothetical protein
												AAP17472.1	rfbB	0.574163	4.18855e-05	dTDP-glucose 4%2C6 dehydratase
												AAP19507.1	efp	0.574046	4.30484e-05	elongation factor P (EF-P)
												AAP18476.1	yhbP	0.573468	8.29457e-05	hypothetical protein
												AAP18495.1	secG	0.572915	4.38976e-05	protein translocase membrane component
												AAP17609.1	yejK	0.572482	5.03396e-05	hypothetical protein
												AAP18372.1	ribB	0.572273	4.75409e-05	3%2C4 dihydroxy-2-butanone-4-phosphate synthase
												AAP19511.1	frdD	0.572231	0.000234432	fumarate reductase%2C anaerobic%2C membrane anchor polypeptide
												AAP15885.1	ybaD	0.57174	5.9621e-05	hypothetical protein
												AAP15868.1	yajF	0.570717	9.13952e-05	possible NAGC-like transcriptional regulator
												AAP16218.1	cds669	0.569615	0.000490714	putative DNA-packaging protein
												AAP18967.1	ivbL	0.568839	5.92776e-05	ilvB operon leader peptide
												AAP17619.1	ccmC	0.568714	0.000138526	heme exporter protein C
												AAP18367.1	ygiA	0.568509	5.64404e-05	hypothetical protein
												AAP19461.1	yjgA	0.568497	5.99668e-05	putative alpha helix protein
												AAP17674.1	menB	0.568161	6.12035e-05	dihydroxynaphtoic acid synthetase
												AAP16351.1	cydD	0.567102	5.58112e-05	ATP-binding component of cytochrome-related transport
												AAP17823.1	cds2275	0.564831	0.0102437	hypothetical protein
												AAP19373.1	rplE	0.564682	5.41198e-05	50S ribosomal subunit protein L5
												AAP19100.1	yibK	0.564386	7.84827e-05	hypothetical protein
												AAP18902.1	wzzE	0.563977	6.39285e-05	putative transport protein
												AAP15879.1	yajC	0.563952	5.85399e-05	hypothetical protein
												AAP16712.1	hemA	0.561253	6.40332e-05	glutamyl-tRNA reductase
												AAP15580.1	caiD	0.561028	0.000808465	carnitine racemase
												AAP18489.1	rbfA	0.560634	7.42155e-05	ribosome-binding factor A
												AAP19528.1	hflX	0.559941	6.38223e-05	GTP-binding subunit of protease specific for phage lambda cII repressor
												AAP16073.1	pal	0.558792	6.53302e-05	peptidoglycan-associated lipoprotein
												AAP18852.1	ubiE	0.558507	7.3076e-05	ubiquinone/menaquinone biosynthesis methyltransferase
												AAP18702.1	nfi	0.558427	8.23166e-05	endonuclease V (deoxyinosine 3 endonuclease)
												AAP17782.1	gltX	0.55819	6.82972e-05	glutamate tRNA synthetase%2C catalytic subunit
												AAP18892.1	wecG	0.557895	0.000119208	probable UDP-N-acetyl-D-mannosaminuronic acid transferase
												AAP18140.1	cds2592	0.557775	7.30548e-05	putative amidase
												AAP19524.1	amiB	0.556486	8.36079e-05	N-acetylmuramoyl-l-alanine amidase II%2C murein hydrolase
												AAP18602.1	yjbH	0.55633	0.000114843	hypothetical protein
												AAP17375.1	vsr	0.555597	0.000144937	DNA mismatch endonuclease%2C patch repair protein
												AAP17723.1	accD	0.555503	7.38034e-05	acetyl CoA carboxylase%2C carboxytransferase component%2C beta subunit
												AAP16146.1	leuS	0.555072	7.31963e-05	leucine tRNA synthetase
												AAP16468.1	fabA	0.554284	7.78148e-05	beta-hydroxydecanoyl thioester dehydrase%2C trans-2-decenoyl-ACP isomerase
												AAP16584.1	mviN	0.554284	0.000103053	putative virulence factor
												AAP19388.1	cds3839	0.553737	0.0193521	ISSfl3 orfA
												AAP15888.1	nusB	0.553533	8.23776e-05	transcription termination factor NusB
												AAP18957.1	yicM	0.553091	0.000125311	putative transport protein
												AAP18601.1	yjbG	0.552213	0.000163248	hypothetical protein
												AAP17035.1	cds1486	0.551746	0.00030033	hypothetical protein
												AAP18821.1	yihL	0.55099	0.00121509	putative transcriptional regulator
												AAP18458.1	cds2909	0.549716	0.0203219	IS1 orfB
												AAP19385.1	rpsD	0.54782	8.99739e-05	30S ribosomal subunit protein S4
												AAP18558.1	tldD	0.547224	9.80408e-05	suppressor of inhibition by CsrA
												AAP18903.1	rfe	0.547065	0.00010443	UDP-GlcNAc:undecaprenylphosphate GlcNAc-1-phosphate transferase
												AAP16104.1	phrB	0.54627	0.000265574	deoxyribodipyrimidine photolyase (photoreactivation)
												AAP19278.1	rtcB	0.5453	0.000242377	hypothetical protein
												AAP17521.1	yegX	0.545016	0.000150869	hypothetical protein
												AAP18113.1	ygcX	0.544798	0.000381853	putative glucarate dehydratase
												AAP15614.1	leuB	0.544403	9.97648e-05	3-isopropylmalate dehydrogenase
												AAP18850.1	yigR	0.544341	0.000105982	hypothetical protein
												AAP17599.1	rtn	0.543464	0.000116249	hypothetical protein
												AAP16365.1	cds817	0.543332	0.00463326	pseudo IS911
												AAP18991.1	dnaN	0.54213	0.00011182	DNA polymerase III%2C beta-subunit
												AAP16469.1	cds921	0.541364	0.000114197	putative ATP-dependent protease
												AAP16660.1	ymfC	0.540566	0.000155089	hypothetical protein
												AAP16687.1	cds1138	0.538665	0.000126063	hypothetical protein
												AAP15668.1	yadG	0.538541	0.0001897	putative ATP-binding component of a transport system
												AAP18376.1	cds2828	0.537643	0.0262703	IS1 orfA
												AAP15657.1	aceF	0.537171	0.000123806	pyruvate dehydrogenase (dihydrolipoyltransacetylase component)
												AAP17732.1	cds2184	0.534288	0.000160512	hypothetical protein
												AAP15570.1	ileS	0.534138	0.000134784	isoleucine tRNA synthetase
												AAP15645.1	yacF	0.532887	0.000166533	hypothetical protein
												AAP17295.1	cds1744	0.531754	0.000572785	putative bacteriophage protein
												AAP17704.1	pta	0.531608	0.00014422	phosphotransacetylase
												AAP19322.1	yhfS	0.531417	0.00105416	hypothetical protein
												AAP17156.1	ydhC	0.530724	0.000467766	putative transport protein
												AAP18103.1	cds2555	0.529309	0.00075652	IS1 orfB
												AAP18244.1	gshB	0.529222	0.00016958	glutathione synthetase
												AAP18929.1	kup	0.528557	0.00024318	low-affinity potassium transport protein
												AAP15689.1	fhuB	0.52817	0.000204613	ferrichrome-iron transport protein FhuB
												AAP17949.1	era	0.527571	0.000170246	GTP-binding protein
												AAP16009.1	nfnB	0.526514	0.000194422	oxygen-insensitive NAD(P)H nitroreductase
												AAP19438.1	valS	0.525898	0.00017026	valine tRNA synthetase
												AAP18867.1	yigG	0.525423	0.0142555	hypothetical protein
												AAP18356.1	ygiX	0.522312	0.00120182	putative 2-component transcriptional regulator
												AAP19383.1	rpsM	0.521627	0.000192705	30S ribosomal subunit protein S13
												AAP15891.1	dxs	0.521116	0.00021602	1-deoxyxylulose-5-phosphate synthase%3B flavoprotein
												AAP18494.1	yhbX	0.520354	0.000519176	putative alkaline phosphatase I
												AAP17675.1	yfbB	0.520343	0.000417445	putative enzyme
												AAP18693.1	yjaB	0.516927	0.00105652	hypothetical protein
												AAP16318.1	ybjF	0.516713	0.000279314	putative enzyme
												AAP16255.1	ybhS	0.515784	0.00028428	hypothetical protein
												AAP17855.1	purN	0.514936	0.000239935	phosphoribosylglycinamide formyltransferase 1
												AAP19460.1	pmbA	0.514918	0.000263001	putative peptide maturation protein
												AAP15954.1	gsk	0.514136	0.000262357	inosine-guanosine kinase
												AAP17743.1	cds2195	0.514057	0.000329609	putative enzyme
												AAP15867.1	yaiD	0.512776	0.000301518	hypothetical protein
												AAP17541.1	yehT	0.510741	0.00035792	hypothetical protein
												AAP17990.1	ffh	0.509009	0.000282097	GTP-binding export factor binds to signal sequence%2C GTP and RNA
												AAP17592.1	cds2045	0.507934	0.0186878	IS1 orfB
												AAP17423.1	cobT	0.507872	0.000394117	nicotinate-nucleotide dimethylbenzimidazole-P phophoribosyl transferase
												AAP16995.1	rplT	0.507849	0.000282786	50S ribosomal subunit protein L20/regulator
												AAP17882.1	xseA	0.507658	0.00028677	exonuclease VII%2C large subunit
												AAP17506.1	yegQ	0.507454	0.000311783	hypothetical protein
												AAP18265.1	mltC	0.50592	0.00038277	membrane-bound lytic murein transglycosylase C
												AAP16057.1	modB	0.504667	0.000613896	molybdate transport permease protein
												AAP15555.1	mog	0.503774	0.000482826	molybdopterin biosynthesis protein
												AAP19594.1	rimI	0.503502	0.000376068	acyltransferase for 30S ribosomal subunit protein S18
												AAP16610.1	holB	0.503403	0.000354147	DNA polymerase III%2C delta prime subunit
												AAP15893.1	xseB	0.502406	0.00038765	exonuclease VII%2C small subunit
												AAP19456.1	treB	0.501937	0.00128069	PTS system enzyme II
												AAP18473.1	yraQ	0.501376	0.000493693	hypothetical protein
												AAP15848.1	gtrBI	0.501076	0.000378229	putative bactoprenol glucosyl transferase
												AAP16501.1	ymcD	0.500778	0.00046859	hypothetical protein
												AAP18053.1	hydN	0.500201	0.00429144	4Fe-4S iron-sulfur protein
												AAP15968.1	ybbM	0.49985	0.000660144	putative metal resistance protein
												AAP16131.1	ybeY	0.499019	0.000387075	hypothetical protein
												AAP15925.1	ybaO	0.499005	0.000833779	putative LRP-like transcriptional regulator
												AAP17651.1	yfaE	0.498691	0.00050412	hypothetical protein
												AAP19344.1	yheS	0.498325	0.000400924	putative ATP-binding component of a transport system
												AAP19221.1	yhiH	0.497664	0.000377385	putative ATP-binding component of a transport system
												AAP15590.1	kefC	0.497441	0.000511562	K+ efflux antiporter
												AAP18081.1	pcm	0.4963	0.000467871	L-isoaspartate protein carboxylmethyltransferase type II
												AAP18243.1	yggJ	0.496269	0.000470338	hypothetical protein
												AAP16442.1	asnS	0.495022	0.000404404	asparagine tRNA synthetase
												AAP19365.1	rpsS	0.494966	0.000400944	30S ribosomal subunit protein S19
												AAP16964.1	xthA	0.493079	0.000508265	exonuclease III
												AAP16952.1	topB	0.492392	0.000448437	DNA topoisomerase III
												AAP16256.1	ybhF	0.492246	0.00046613	putative ATP-binding component of a transport system
												AAP16462.1	ycbY	0.490687	0.000469823	putative oxidoreductase
												AAP17350.1	yedD	0.489603	0.000558423	hypothetical protein
												AAP16114.1	pgm	0.4891	0.000471356	phosphoglucomutase
												AAP16466.1	ymbA	0.488642	0.000683191	hypothetical protein
												AAP17038.1	dcp	0.48699	0.000533826	dipeptidyl carboxypeptidase II
												AAP17337.1	uvrC	0.486252	0.000531276	excinuclease ABC%2C subunit C
												AAP19347.1	slyD	0.485943	0.000517839	FKBP-type peptidyl-prolyl cis-trans isomerase (rotamase)
												AAP15565.1	cds17	0.484891	0.0333106	IS1 orfB
												AAP17830.1	acrD	0.484349	0.000743742	multidrug resistance protein
												AAP15566.1	cds18	0.484042	0.0139384	IS1 orfA
												AAP15582.1	caiB	0.484029	0.00117937	l-carnitine dehydratase
												AAP19171.1	yhjK	0.483885	0.0006285	hypothetical protein
												AAP19334.1	yhfG	0.483831	0.00107599	hypothetical protein
												AAP16761.1	trpA	0.482871	0.000577895	tryptophan synthase%2C alpha protein
												AAP15660.1	yacL	0.482755	0.000787263	hypothetical protein
												AAP18866.1	rarD	0.482689	0.000783721	hypothetical protein
												AAP18514.1	vpsB	0.482134	0.000631906	integral membrane protein
												AAP15712.1	lpxD	0.481991	0.000568549	UDP-3-O-(3-hydroxymyristoyl)-glucosamine N-acyltransferase
												AAP17087.1	mlc	0.481191	0.000686917	putative NAGC-like transcriptional regulator
												AAP18659.1	phnA	0.481148	0.000868205	hypothetical protein
												AAP15961.1	ybaR	0.480305	0.000611311	putative ATPase
												AAP15947.1	dnaX	0.479878	0.000613699	DNA polymerase III%2C tau and gamma subunits%3B DNA elongation factor III
												AAP17708.1	yfcF	0.479293	0.000838508	hypothetical protein
												AAP18777.1	yiiM	0.479227	0.000904862	hypothetical protein
												AAP18877.1	dapF	0.479156	0.000681856	diaminopimelate epimerase
												AAP15955.1	ybaL	0.477618	0.000683925	putative transport protein
												AAP16730.1	purU	0.476858	0.000725116	formyltetrahydrofolate deformylase
												AAP16193.1	ybcR	0.475495	0.00369869	hypothetical bacteriophage protein
												AAP16659.1	cds1110	0.475333	0.00101076	putative phosphohydrolase
												AAP18424.1	yqjA	0.474937	0.000832047	hypothetical protein
												AAP18593.1	trkA	0.474451	0.000755995	transport protein for potassium
												AAP18497.1	folP	0.474233	0.00080995	7%2C8-dihydropteroate synthase
												AAP17661.1	cds2113	0.473959	0.000788509	hypothetical protein
												AAP17950.1	rnc	0.473905	0.000741426	RNase III
												AAP16117.1	ybfE	0.473832	0.00104937	hypothetical protein
												AAP17008.1	ydiA	0.473428	0.000874716	hypothetical protein
												AAP16343.1	cds794	0.473013	0.00082424	putative membrane protein
												AAP15921.1	ybaV	0.471943	0.00203675	hypothetical protein
												AAP18026.1	proW	0.471154	0.000817634	glycine betaine/L-proline transport system permease protein
												AAP18689.1	metH	0.469511	0.000906548	B12-dependent homocysteine-N5-methyltetrahydrofolate transmethylase
												AAP18572.1	prmA	0.469309	0.00096876	methylase for 50S ribosomal subunit protein L11
												AAP18143.1	recB	0.469274	0.000814412	DNA helicase%2C ATP-dependent dsDNA/ssDNA exonuclease V subunit%2C ssDNA endonuclease
												AAP17617.1	ccmE	0.468829	0.00238142	cytochrome-c biosynthesis heme-carrier protein ccmE
												AAP17000.1	btuC	0.468727	0.0010197	Vitamin B12 transport permease protein
												AAP16102.1	ybgI	0.467531	0.000888294	hypothetical protein
												AAP15839.1	proA	0.466054	0.000887272	gamma-glutamylphosphate reductase
												AAP19313.1	gph	0.466002	0.000907075	phosphoglycolate phosphatase
												AAP16873.1	ydcG	0.46515	0.00090702	putative glycoprotein
												AAP19164.1	yhjU	0.465101	0.00117731	hypothetical protein
												AAP19200.1	yhiR	0.464606	0.000976515	hypothetical protein
												AAP17925.1	purL	0.462772	0.000931402	phosphoribosylformyl-glycineamide synthetase%2C FGAM synthetase
												AAP16915.1	cds1366	0.46251	0.00106298	hypothetical protein
												AAP16429.1	kdsB	0.462425	0.00104412	CTP:CMP-3-deoxy-D-manno-octulosonate transferase
												AAP17251.1	ruvB	0.462389	0.00100304	Holliday junction helicase subunit A
												AAP15659.1	acnB	0.462315	0.000936582	aconitate hydrase B
												AAP18691.1	aceA	0.460607	0.00149739	isocitrate lyase
												AAP15948.1	ybaB	0.459398	0.00107876	hypothetical protein
												AAP18521.1	yhbG	0.459122	0.00106807	putative ATP-binding component of a transport system
												AAP15987.1	cysS	0.459053	0.0010726	cysteine tRNA synthetase
												AAP18352.1	plsC	0.45875	0.00117388	1-acyl-sn-glycerol-3-phosphate acyltransferase
												AAP18308.1	glcG	0.458283	0.00499277	hypothetical protein
												AAP16435.1	mukB	0.457846	0.00106918	kinesin-like cell division protein
												AAP17765.1	ddg	0.457775	0.00111562	putative heat shock protein
												AAP18086.1	cds2538	0.456794	0.0012469	hypothetical protein
												AAP17459.1	cds1908	0.45671	0.00130872	hypothetical protein
												AAP19611.1	yjjK	0.456621	0.00111389	putative ATP-binding component of a transport system
												AAP18904.1	rho	0.456342	0.00109666	transcription termination factor Rho%2C polarity suppressor
												AAP17975.1	cds2427	0.456036	0.00233879	IS4 orf
												AAP18077.1	yclC	0.453512	0.00169946	putative 4-hydroxybenzoate decarboxylase
												AAP16706.1	pth	0.452955	0.0014748	peptidyl-tRNA hydrolase
												AAP18387.1	ygiG	0.452459	0.00281796	putative kinase
												AAP18907.1	rhlB	0.452112	0.00123354	putative ATP-dependent RNA helicase
												AAP17883.1	cds2335	0.451668	0.00147484	hypothetical protein
												AAP19067.1	dfp	0.449923	0.00143034	flavoprotein
												AAP17615.1	dsbE	0.449744	0.00327478	disulfide oxidoreductase
												AAP17726.1	usg	0.447865	0.00142874	putative PTS system enzyme II A component
												AAP16059.1	cds510	0.446678	0.00249348	hypothetical protein
												AAP17618.1	ccmD	0.445958	0.00620795	heme exporter protein C
												AAP19512.1	frdC	0.445547	0.00316729	fumarate reductase%2C anaerobic%2C membrane anchor polypeptide
												AAP18502.1	dacB	0.445194	0.00160573	D-alanyl-D-alanine carboxypeptidase%2C fraction B%2C penicillin-binding protein 4
												AAP16948.1	ansA	0.444996	0.00167707	cytoplasmic L-asparaginase I
												AAP19497.1	aspA	0.444196	0.00157843	aspartate ammonia-lyase (aspartase)
												AAP16648.1	cds1099	0.44397	0.0481142	putative head-tail adaptor
												AAP18511.1	yrbB	0.443937	0.00165244	hypothetical protein
												AAP18591.1	fmt	0.443779	0.00154122	10-formyltetrahydrofolate:L-methionyl-tRNA(fMet) N-formyltransferase
												AAP18115.1	cds2567	0.442817	0.0211256	putative transport protein
												AAP16123.1	nagE	0.441179	0.00183329	N-acetylglucosamine-specific enzyme IIABC
												AAP19024.1	pstC	0.44042	0.00183705	high-affinity phosphate-specific transport protein%2C cytoplasmic membrane component
												AAP16787.1	fabI	0.440046	0.0016464	enoyl-[acyl-carrier-protein] reductase (NADH)
												AAP18411.1	ygjQ	0.439603	0.00482588	hypothetical protein
												NP_858159.1	cds4076	0.439123	0.00225574	IS100 ORF1
												AAP16775.1	cysB	0.438793	0.00177735	positive transcriptional regulator for cysteine regulon
												AAP18637.1	yjcE	0.438366	0.00193999	hypothetical protein
												AAP18838.1	trkH	0.437654	0.00187501	potassium uptake protein
												AAP18078.1	padI	0.436978	0.00565882	phenylacrylic acid decarboxylase-like protein
												AAP16072.1	ybgF	0.435847	0.00183783	hypothetical protein
												AAP16935.1	cds1386	0.435419	0.00226303	putative aldehyde reductase
												AAP18228.1	cds2680	0.435325	0.00222545	putative serine protease
												AAP17294.1	cds1743	0.434836	0.00549637	hypothetical bacteriophage protein
												AAP19274.1	glpE	0.434693	0.00261128	protein of glp regulon
												AAP17886.1	cds2338	0.433968	0.00196099	hypothetical protein
												AAP18456.1	agaA	0.433649	0.00214328	N-acetylglucosamine-6-phosphate deacetylase
												AAP18344.1	yghB	0.432501	0.00238657	hypothetical protein
												AAP17098.1	ydgB	0.432176	0.00258188	putative oxidoreductase
												AAP19311.1	dam	0.432099	0.00213869	DNA adenine methylase
												AAP19317.1	yhfX	0.431754	0.0234367	hypothetical protein
												AAP18890.1	aslB	0.431378	0.0034841	putative arylsulfatase regulator
												AAP15596.1	surA	0.429127	0.00215078	survival protein
												AAP19386.1	rpoA	0.428259	0.00216832	RNA polymerase%2C alpha subunit
												AAP15673.1	yadD	-0.428677	0.00308835	hypothetical protein
												AAP18205.1	rpiA	-0.431574	0.00222125	ribosephosphate isomerase
												AAP16973.1	celA	-0.432383	0.00404869	PEP-dependent phosphotransferase enzyme IV for cellobiose%2C arbutin%2C and salicin
												AAP17056.1	cds1507	-0.432668	0.00225063	putative enzyme
												AAP18765.1	fpr	-0.433099	0.0021359	ferredoxin-NADP reductase
												AAP16077.1	tolQ	-0.433533	0.00209963	inner membrane protein TolQ
												AAP18045.1	srlD	-0.433734	0.00814054	glucitol (sorbitol)-6-phosphate dehydrogenase
												AAP16568.1	cds1020	-0.433832	0.00210982	hypothetical bacteriophage protein
												AAP16727.1	narH	-0.43398	0.00230494	nitrate reductase 1%2C beta subunit
												AAP18209.1	ygfG	-0.434029	0.00539418	putative enzyme
												AAP16559.1	cds1011	-0.434171	0.0132686	IS911 orfB
												AAP17186.1	ydiB	-0.43418	0.00604911	putative oxidoreductase
												AAP18772.1	pfkA	-0.434211	0.00193935	6-phosphofructokinase I
												AAP15846.1	cds297	-0.434853	0.00524943	hypothetical protein
												AAP19150.1	yiaE	-0.435503	0.00192684	putative dehydrogenase
												AAP16723.1	narL	-0.435752	0.00199566	nitrate/nitrite response regulator protein NarL
												AAP16283.1	ybiW	-0.436164	0.00312686	putative formate acetyltransferase
												AAP19116.1	aldB	-0.436433	0.0113667	aldehyde dehydrogenase B (lactaldehyde dehydrogenase)
												AAP16945.1	cds1396	-0.43663	0.00265964	putative DEOR-type transcriptional regulator
												AAP19195.1	arsB	-0.437332	0.00554778	arsenical pump membrane protein
												AAP18459.1	agaC	-0.437673	0.00541823	N-acetylgalactosamine-specific transport IIC component 1
												AAP17046.1	marA	-0.437756	0.00461047	transcriptional activator of defense systems
												AAP18660.1	yjdA	-0.438011	0.00236436	putative vimentin
												AAP16039.1	dsbG	-0.442197	0.00283015	thiol:disulfide interchange protein
												AAP16105.1	ybgA	-0.442212	0.00486833	hypothetical protein
												AAP15588.1	yaaU	-0.442526	0.0181541	putative transport protein
												AAP18329.1	hybD	-0.442528	0.00210233	hydrogenase-2 component
												AAP18683.1	sorB	-0.442687	0.0276982	putative sorbose-permease PTS system IIB component
												AAP15909.1	cds360	-0.442873	0.00303031	ISSfl3 orfC
												NP_858382.1	cds4288	-0.44345	0.0015261	conjugal transfer nickase/helicase TraI
												AAP18953.1	cds3404	-0.443669	0.00168618	putative secreted autotransporter toxin
												AAP16437.1	ycbB	-0.444132	0.00155622	putative amidase
												AAP18371.1	ygiE	-0.444392	0.00163485	hypothetical protein
												AAP16338.1	aqpZ	-0.445528	0.00319075	transmembrane water channel AqpZ protein
												AAP19404.1	uxuA	-0.445692	0.00231418	mannonate hydrolase
												AAP18634.1	soxS	-0.446223	0.00164147	regulation of superoxide response regulon
												AAP16636.1	pepT	-0.446224	0.00161856	putative peptidase T
												AAP16810.1	ycjP	-0.446282	0.0413417	putative transport system permease protein
												AAP19175.1	yhjH	-0.446386	0.0429769	hypothetical protein
												AAP17297.1	yecN	-0.447032	0.00176042	hypothetical protein
												AAP18654.1	cds3105	-0.447447	0.0224724	IS1 orfB
												AAP18516.1	yrbG	-0.447613	0.00156545	hypothetical protein
												AAP17049.1	ydeA	-0.447703	0.00184744	putative resistance / regulatory protein
												AAP17057.1	cds1508	-0.448424	0.0015562	hypothetical protein
												AAP18107.1	eno	-0.448978	0.00131192	enolase
												AAP18919.1	yifE	-0.449784	0.00153319	hypothetical protein
												AAP15676.1	cds128	-0.449816	0.0148444	IS1 orfA
												AAP15908.2	cds359	-0.449932	0.00412869	ISSfl3 orfC
												AAP18419.1	cds2870	-0.450051	0.00193749	hypothetical protein
												AAP16480.1	cds932	-0.450612	0.0033402	hypothetical protein
												AAP17742.1	cds2194	-0.451028	0.00129584	hypothetical protein
												AAP17938.1	cds2390	-0.451237	0.00256257	putative tail fiber protein
												AAP18298.1	yeeW	-0.451507	0.00431582	hypothetical protein
												AAP17943.1	cds2395	-0.451526	0.00207123	hypothetical protein
												AAP16875.1	ydcH	-0.451836	0.00162943	hypothetical protein
												AAP18043.1	srlE	-0.451935	0.0267159	PTS system%2C glucitol/sorbitol-specific IIB component and second of two IIC components
												AAP16987.1	cds1438	-0.452199	0.00223276	hypothetical protein
												NP_858322.1	cds4233	-0.452856	0.00246814	IS600 ORF2
												AAP18686.1	sorE	-0.453356	0.00274253	putative L-sorbose-1-P-reductase
												AAP16454.1	ycbS	-0.453667	0.00192465	putative outer membrane protein
												AAP17657.1	glpB	-0.453672	0.00614835	sn-glycerol-3-phosphate dehydrogenase (anaerobic)%2C membrane anchor subunit
												AAP17638.1	cds2091	-0.45465	0.00208752	hypothetical protein
												AAP17361.1	fliI	-0.455572	0.00870487	flagellum-specific ATP synthase
												AAP16795.1	cds1246	-0.455715	0.00170309	putative glutamine synthetase
												AAP15873.1	phoR	-0.45705	0.00121302	positive and negative sensor protein for pho regulon
												NP_858269.1	mxiG	-0.457433	0.001062	MxiG protein
												AAP18698.1	yjaI	-0.457656	0.00156303	hypothetical protein
												AAP15751.1	cds203	-0.457819	0.00177021	putative cytoplasmic protein
												AAP18920.1	yifA	-0.45799	0.00118478	hypothetical protein
												AAP19181.1	cds3632	-0.458889	0.0293626	IS4 orf
												AAP17770.1	cds2222	-0.459074	0.00433489	hypothetical protein
												NP_858170.1	cds4085	-0.459156	0.00116643	hypothetical protein
												AAP16965.1	cds1416	-0.460036	0.00783503	hypothetical protein
												NP_858257.1	acp	-0.460825	0.00104948	Acp%2C putative acyl carrier protein
												AAP15966.1	ybbK	-0.46113	0.00101888	putative protease
												AAP18761.1	yiiU	-0.461819	0.00100955	hypothetical protein
												AAP18306.1	yghK	-0.462111	0.00319325	putative permease
												AAP16508.1	torT	-0.462498	0.00226145	periplasmic protein TorT
												AAP17013.1	ydiR	-0.46291	0.00457454	putative flavoprotein
												AAP16573.1	yceO	-0.463337	0.0111478	hypothetical protein
												AAP16069.1	ybgR	-0.463761	0.00121739	putative transport system permease protein
												AAP16527.1	ycdC	-0.465454	0.00118292	putative tet operon regulator
												AAP15575.1	dapB	-0.465578	0.000993725	dihydrodipicolinate reductase
												AAP17968.1	yfiM	-0.465678	0.001237	hypothetical protein
												NP_858161.2	cds4077	-0.466595	0.000893418	ISSfl3 ORF
												AAP18417.1	uxaC	-0.466707	0.00170298	uronate isomerase
												AAP15862.1	yaiA	-0.467288	0.000960819	hypothetical protein
												AAP15817.1	yafH	-0.467591	0.000912082	putative acyl-CoA dehydrogenase
												AAP16455.1	cds907	-0.468058	0.00159602	FimH-like protein
												AAP19244.1	rpoH	-0.468659	0.000808155	sigma(32) factor of RNA polymerase
												AAP18193.1	bglA	-0.469562	0.000863555	6-phospho-beta-glucosidase A
												AAP15932.1	cds383	-0.469919	0.00754097	IS4 orf
												AAP16275.1	ompX	-0.470198	0.00076574	outer membrane protein X
												AAP16704.1	cds1155	-0.470215	0.000766755	putative adhesion and penetration protein
												AAP15780.1	phoA	-0.470754	0.000851096	alkaline phosphatase
												AAP17179.1	cds1628	-0.470847	0.000822569	hypothetical protein
												AAP16521.1	cds973	-0.472514	0.0180651	hypothetical protein
												NP_858162.1	cds4079	-0.472874	0.00088647	transposase/IS protein
												AAP17011.1	ydiT	-0.472983	0.0135094	hypothetical protein
												AAP17229.1	cds1678	-0.473199	0.0012789	IS629 orfB
												AAP18705.1	yjaE	-0.47325	0.000788977	putative transcriptional regulator
												AAP18223.1	yggD	-0.473327	0.000920979	putative transcriptional regulator
												AAP17942.1	cds2394	-0.473923	0.0145922	IS600 orfB
												AAP19119.1	cds3570	-0.474742	0.00434912	putative membrane protein
												AAP15773.1	cds225	-0.474883	0.0123062	putative head assembly protein
												AAP17496.1	cds1945	-0.475349	0.00858023	ISSfl4 orf
												AAP17841.1	hyfC	-0.475801	0.0388287	hydrogenase 4 membrane subunit
												AAP16491.1	hyaE	-0.475925	0.00346551	Hydrogenase-1 operon protein hyaE
												NP_858277.1	mxiE	-0.476333	0.00065979	AraC-like family protein MxiE
												NP_858268.1	ipgF	-0.476354	0.000654346	periplasmic protein IpgF
												NP_858188.1	cds4101	-0.476592	0.0167273	IS629 ORF1
												AAP17134.1	cds1585	-0.476633	0.00112996	IS2 orfA
												AAP17680.1	elaC	-0.478003	0.000802646	hypothetical protein
												NP_858251.1	cds4164	-0.478155	0.000798537	IS150 ORF B
												AAP17790.1	ptsH	-0.479872	0.000601231	PTS system protein HPr
												AAP16395.1	ybhJ	-0.47991	0.000987793	putative enzyme
												AAP17411.1	cds1860	-0.48008	0.038774	hypothetical protein
												AAP16842.1	cds1293	-0.480392	0.0566658	putative secretion protein
												AAP15861.1	aroL	-0.480692	0.000622789	shikimate kinase II
												AAP16388.1	cds840	-0.480778	0.0233412	IS600 orfB
												AAP17102.1	rstB	-0.481345	0.000803151	sensor histidine protein kinase%2C RstA regulator
												AAP16362.1	ycaD	-0.48181	0.000859879	putative transport protein
												AAP18552.1	yhcN	-0.482022	0.00171908	hypothetical protein
												AAP16913.1	cds1364	-0.482098	0.00100766	hypothetical protein
												AAP16266.1	ybiX	-0.482178	0.00187835	putative enzyme
												AAP18645.1	nrfE	-0.482474	0.00641671	formate-dependent nitrite reductase
												AAP19331.1	nirB	-0.483306	0.00178564	nitrite reductase (NAD(P)H) subunit
												AAP17578.1	yeiE	-0.483465	0.000729629	putative LYSR-type transcriptional regulator
												AAP16124.1	nagB	-0.483596	0.000649699	glucosamine-6-phosphate deaminase
												AAP18253.1	cds2705	-0.483629	0.0191387	hypothetical protein
												AAP17500.1	issfl4	-0.484004	0.00211323	ISSfl4 orf
												AAP18309.1	glcC	-0.484328	0.00066959	transcriptional activator for glc operon
												AAP15976.1	gcl	-0.48436	0.00146558	glyoxylate carboligase
												AAP18333.1	cds2785	-0.484396	0.00241058	putative hydrogenase subunit
												NP_858209.1	cds4123	-0.484551	0.000987783	iso-IS1 ORF1
												AAP16587.1	flgA	-0.485217	0.00318167	flagellar basal body P-ring protein FlgA precursor
												AAP18323.1	pitB	-0.486043	0.00155265	low-affinity phosphate transport protein
												AAP19423.1	cds3873	-0.486075	0.058214	hypothetical protein
												AAP16826.1	cds1277	-0.487352	0.00751427	IS600 orfB
												AAP17346.1	fliD	-0.487624	0.002224	flagellar protein FliD
												AAP18831.1	yihF	-0.487699	0.000845707	putative GTP-binding protein
												AAP16049.1	citF	-0.488189	0.00910978	citrate lyase alpha chain
												AAP17829.1	yffG	-0.488662	0.000958452	putative oxidoreductase%2C Fe-S subunit
												AAP19416.1	fimB	-0.488828	0.000720472	recombinase%3B regulator for fimA
												NP_858361.1	mob9	-0.489501	0.000527759	plasmid mobilization protein
												AAP16407.1	cds859	-0.489811	0.00873807	IS1 orfA
												AAP16930.1	cds1381	-0.490346	0.00122234	hypothetical protein
												AAP17067.1	cds1518	-0.490822	0.00916786	ISEhe3 orfB
												AAP16640.1	cds1091	-0.491554	0.0172667	hypothetical bacteriophage protein
												AAP17101.1	cds1552	-0.492181	0.00153751	putative transporter
												AAP16581.1	rimJ	-0.492403	0.000517974	ribosomal-protein-alanine acetyltransferase
												AAP16684.1	dadA	-0.4925	0.000500711	D-amino acid dehydrogenase subunit
												AAP16734.1	galU	-0.492796	0.000440429	glucose-1-phosphate uridylyltransferase
												AAP17267.1	cds1716	-0.492956	0.00359537	putative host-nuclease inhibitor protein Gam
												AAP18074.1	cds2526	-0.492975	0.00150592	putative phage transposase
												AAP18539.1	yhcK	-0.493459	0.000448519	putative FADA-type transcriptional regulator
												AAP17818.1	cds2270	-0.493845	0.00662559	hypothetical protein
												AAP17398.1	cds1847	-0.494609	0.000890959	hypothetical bacteriophage protein
												AAP16829.1	cds1280	-0.495863	0.000943444	hypothetical protein
												AAP16358.1	dmsA	-0.495974	0.000949868	anaerobic dimethyl sulfoxide reductase subunit A
												AAP15959.1	ybaP	-0.496062	0.000485392	putative ligase
												AAP15737.1	yafD	-0.496541	0.000396217	hypothetical protein
												AAP15725.1	cutF	-0.496579	0.000420315	copper homeostasis protein (lipoprotein)
												AAP16988.1	pfkB	-0.497146	0.00041992	6-phosphofructokinase II
												AAP18440.1	tdcD	-0.497423	0.00187882	putative kinase
												AAP15776.1	cds228	-0.498217	0.000593434	putative DNA transfer protein
												AAP18101.1	cds2553	-0.498232	0.00926877	hypothetical protein
												AAP18785.1	rhaA	-0.498735	0.00446324	L-rhamnose isomerase
												AAP17421.1	nac	-0.500595	0.000664157	nitrogen assimilation control protein
												AAP19272.1	cds3723	-0.500769	0.00942806	IS4 orf
												AAP18452.1	agaV	-0.501228	0.00920228	cytoplasmic transport protein N-acetylgalactosamine-specific IIB component 2 (EIIB-AGA)
												AAP19548.1	sgaB	-0.501798	0.00870734	hypothetical protein
												AAP18461.1	agaI	-0.502061	0.000992089	putative galactosamine-6-phosphate isomerase
												AAP17621.1	ccmA	-0.502354	0.000611752	ATP-binding protein of heme exporter A
												AAP16862.1	acpD	-0.502797	0.000521038	acyl carrier protein phosphodiesterase
												NP_858179.2	virF	-0.503842	0.000326521	transcriptional activator VirF
												AAP18260.1	yggN	-0.505347	0.000338302	hypothetical protein
												AAP16177.1	cds628	-0.50576	0.000325618	putative bacteriophage protein
												AAP19088.1	tdh	-0.506116	0.000349358	threonine dehydrogenase
												AAP17329.1	yecI	-0.507175	0.000299797	ferritin-like protein
												AAP17023.1	cds1474	-0.507634	0.0132301	putative lysis protein S of prophage CP-933V
												AAP17268.1	cds1717	-0.50784	0.000419727	putative bacteriophage protein
												AAP17399.1	cds1848	-0.507971	0.000435793	putative sheath protein
												AAP16878.1	tehA	-0.508473	0.0004551	Tellurite resistance protein TehA
												AAP18208.1	ygfD	-0.508494	0.00144435	putative nucleotide-binding protein
												AAP15777.1	cds229	-0.508772	0.0095838	IS629 orfA
												AAP17163.1	ydhU	-0.509167	0.000770535	hypothetical protein
												AAP17920.1	hmpA	-0.509618	0.000326458	dihydropteridine reductase
												AAP17136.1	slyB	-0.509871	0.000270493	putative outer membrane protein
												AAP19006.1	yieF	-0.513107	0.000252529	hypothetical protein
												AAP19579.1	hpcR	-0.513166	0.00145148	regulator of the 4HPA-hydroxylase operon
												AAP16683.1	ycgB	-0.513432	0.000372532	putative sporulation protein
												AAP19479.1	ytfG	-0.513475	0.000529053	putative oxidoreductase
												AAP17587.1	yeiC	-0.514095	0.00663538	putative kinase
												AAP17200.1	cds1649	-0.514482	0.000625231	putative ATP-binding component of a transport system
												AAP19087.1	kbl	-0.514568	0.000275218	2-amino-3-ketobutyrate CoA ligase (glycine acetyltransferase)
												AAP17431.1	cds1880	-0.514696	0.00316179	ISSfl3 orfB
												AAP19458.1	nrdD	-0.515246	0.000326621	anaerobic ribonucleoside-triphosphate reductase
												AAP17612.1	yejO	-0.515658	0.000278293	putative ATP-binding component of a transport system
												AAP16347.1	clpA	-0.51578	0.000226759	ATP-binding component of serine protease
												AAP17709.1	yfcG	-0.516473	0.000612652	putative S-transferase
												AAP16112.1	kdpC	-0.51657	0.000501778	potassium-transporting ATPase
												AAP18483.1	mtr	-0.516759	0.00026743	tryptophan-specific transport protein
												AAP18281.1	cds2733	-0.516769	0.000621631	IS2 orfA
												AAP18255.1	cds2707	-0.516823	0.00230054	hypothetical protein
												AAP19260.1	yhhW	-0.517249	0.000352585	hypothetical protein
												AAP19617.1	cds4067	-0.51728	0.000244682	catabolic regulation response regulator
												AAP15735.1	cds187	-0.517404	0.00242765	IS4 orf
												AAP16773.1	yciN	-0.518435	0.000262917	hypothetical protein
												AAP16868.1	cds1319	-0.518829	0.0110182	IS103 orf
												AAP19142.1	gadA	-0.518934	0.000609648	glutamate decarboxylase isozyme
												NP_858302.2	cds4214	-0.520006	0.0016494	hypothetical protein
												AAP16200.1	cds651	-0.521243	0.000599118	putative replication protein DnaC
												AAP15815.1	yafV	-0.521371	0.000245019	putative amidase-type enzyme
												AAP16481.1	cds933	-0.521487	0.000269271	hypothetical protein
												AAP16509.1	torR	-0.522245	0.000534561	TorCAD response regulator
												AAP18599.1	yjbE	-0.522264	0.000196853	hypothetical protein
												AAP16546.1	cds998	-0.525228	0.00117633	hypothetical protein
												AAP16449.1	ycbO	-0.52545	0.00357238	hypothetical protein
												AAP17363.1	fliL	-0.526547	0.00593412	flagellar protein FliL
												AAP17311.1	cds1760	-0.526585	0.00023035	hypothetical protein
												NP_858172.1	cds4087	-0.526899	0.000353984	IS629 ORF2
												NP_858207.1	cds4121	-0.527426	0.000483903	ISSfl1 ORF2
												NP_858196.1	ospC2	-0.528711	0.0001582	hypothetical protein
												AAP18819.1	yihN	-0.529555	0.00128695	putative resistance protein
												NP_858327.1	stbB	-0.53051	0.000158959	plasmid stable inheritance protein
												AAP16436.1	cds888	-0.530995	0.00867055	IS4 orf
												NP_858344.1	cds4255	-0.53121	0.000365926	ISSfl4 ORF1
												AAP16176.1	cds627	-0.531303	0.000244703	putative bacteriophage protein
												AAP18450.1	agaR	-0.531549	0.000197798	putative DEOR-type transcriptional regulator of aga operon
												AAP19559.1	cds4009	-0.531871	0.00408453	ISEhe3 orfB
												AAP16386.1	cds838	-0.532295	0.013768	IS600 orfB
												AAP17380.1	cds1829	-0.533172	0.000279997	IS2 orfB
												AAP16284.1	ybiY	-0.533708	0.00169488	putative pyruvate formate-lyase 2 activating enzyme
												AAP18556.1	yhcR	-0.534408	0.000416203	hypothetical protein
												NP_858294.1	cds4207	-0.534565	0.0487098	IS1294 transposase
												AAP17316.1	cheR	-0.534574	0.00119941	response regulator for chemotaxis%3B protein glutamate methyltransferase
												NP_858231.1	cds4146	-0.535229	0.00207445	ISSfl1 ORF2
												AAP19203.1	uspA	-0.535614	0.000129604	universal stress protein
												AAP15785.1	yaiW	-0.535614	0.000148417	hypothetical protein
												AAP19143.1	yhjA	-0.536179	0.000325481	putative cytochrome C peroxidase
												AAP18681.1	sorD	-0.536196	0.00368882	putative sorbitol-6-phosphate 2-dehydrogenase
												AAP18441.1	tdcC	-0.536212	0.000360162	anaerobically inducible permease for L-threonine and L-serine
												AAP18232.1	cds2684	-0.537108	0.000609142	hypothetical lipoprotein
												AAP16750.1	cds1201	-0.537307	0.0374198	IS600 orfA
												AAP17670.1	cds2122	-0.538341	0.000345651	sucrose-6 phosphate hydrolase
												AAP18650.1	yjcP	-0.539151	0.000906654	putative enzyme
												AAP19218.1	cds3669	-0.539267	0.00248087	hypothetical protein
												AAP16725.1	narK	-0.540844	0.00237289	nitrate transport protein nark
												AAP18291.1	cds2743	-0.541379	0.000246482	hypothetical protein
												AAP17622.1	napC	-0.541674	0.000281084	cytochrome c-type protein
												AAP18588.1	smg	-0.541797	0.00011405	hypothetical protein
												AAP16944.1	cds1395	-0.542572	0.000436758	hypothetical protein
												AAP16966.1	cds1417	-0.543385	0.000282843	putative aldehyde dehydrogenase
												AAP18708.1	thiF	-0.544395	0.000101467	thiamin biosynthesis protein%2C thiazole moiety
												AAP17289.1	cds1738	-0.544532	0.00157197	putative crossover junction endodeoxyribonuclease
												NP_858311.1	cds4222	-0.545746	0.00011366	IS3 ORF2
												AAP15938.1	ybaJ	-0.546097	0.000101792	hypothetical protein
												AAP19324.1	yhfQ	-0.546714	0.00051632	putative kinase
												NP_858252.2	cds4165	-0.548314	0.000102821	transposase
												AAP19413.1	fimA	-0.54885	0.00118978	major type 1 subunit fimbrin (pilin)
												AAP19613.1	cds4063	-0.549434	8.75521e-05	regulator for trp operon and aroH%3B trp aporepressor
												AAP16726.1	narG	-0.549675	0.000181682	nitrate reductase 1 alpha subunit
												AAP19046.1	cds3497	-0.551171	0.000554442	IS3 orfB
												NP_858187.1	ipaH2	-0.551661	0.000274953	invasion plasmid antigen
												AAP18429.1	yqjG	-0.55195	0.000139108	putative transferase
												AAP18684.1	sorA	-0.552442	0.00126727	putative sorbose-permease PTS system IIC component
												NP_858266.1	ipgD	-0.553453	7.55264e-05	hypothetical protein
												AAP18293.1	cds2745	-0.554029	0.00119656	hypothetical protein
												AAP17012.1	ydiS	-0.554058	0.000549917	flavoprotein
												AAP15639.1	lpxC	-0.554129	7.43565e-05	UDP-3-O-acyl N-acetylglucosamine deacetylase
												AAP17479.1	cpsG	-0.554376	0.000487973	phosphomannomutase
												NP_858367.1	cds4276	-0.55444	7.34765e-05	hypothetical protein
												AAP19019.1	bglF	-0.554642	0.000657718	PTS system beta-glucosides%2C enzyme II%2C cryptic
												AAP19412.1	fimI	-0.556365	0.00135801	fimbrial protein
												AAP19447.1	yjgI	-0.556796	0.000222491	putative oxidoreductase
												NP_858255.2	ipaJ	-0.557031	6.87595e-05	IpaJ%2C invasion plasmid antigen
												NP_858394.1	cds4300	-0.558237	0.000178101	hypothetical protein
												AAP16506.1	ymcE	-0.558238	9.75541e-05	suppressor of fabA and ts growth mutation
												AAP16797.1	ycjC	-0.559475	0.000117614	hypothetical protein
												AAP15810.1	cds262	-0.559658	0.0162808	putative cytoplasmic protein
												AAP18100.1	ygcS	-0.559701	0.00522234	putative transport protein
												AAP17320.1	cheA	-0.559729	0.000520593	chemotaxis protein CheA
												AAP17870.1	cds2322	-0.559981	6.59835e-05	hypothetical arsenate reductase
												AAP16336.1	cds787	-0.560059	0.0216895	IS2 orfB
												AAP17222.1	cds1671	-0.560166	0.000102801	hypothetical protein
												AAP16846.1	ynaF	-0.560183	9.22411e-05	putative filament protein
												AAP15830.1	prfH	-0.560734	0.000259303	probable peptide chain release factor
												AAP18608.1	malK	-0.560735	0.000598834	ATP-binding component of transport system for maltose
												AAP16563.1	cds1015	-0.563939	0.00282462	IS629 orfA
												AAP17270.1	cds1719	-0.564032	0.0013042	IS629 orfB
												AAP16082.1	ybgG	-0.565484	7.35496e-05	putative sugar hydrolase
												AAP16308.1	grxA	-0.568747	0.000259544	glutaredoxin1 redox coenzyme for glutathione-dependent ribonucleotide reductase
												AAP17413.1	cds1862	-0.569256	5.41695e-05	hypothetical protein
												AAP16282.1	cds733	-0.569386	6.09774e-05	hypothetical protein
												AAP16328.1	cds779	-0.569798	5.28553e-05	putative regulator
												AAP17323.1	flhC	-0.569975	0.00165179	flagellar transcriptional activator FlhC
												NP_858306.1	cds4217	-0.570013	6.73291e-05	IS629 ORF2
												AAP19545.1	yjfQ	-0.570388	6.34986e-05	putative DEOR-type transcriptional regulator
												AAP18254.1	cds2706	-0.57101	0.000603971	hypothetical protein
												AAP17891.1	ndk	-0.573506	4.27083e-05	nucleoside diphosphate kinase
												AAP15937.1	hha	-0.574354	4.56505e-05	hemolysin expression modulating protein
												NP_858143.1	ospF	-0.574713	4.0294e-05	OspF
												AAP17426.1	cds1875	-0.574986	0.000844383	IS600 orfA
												NP_858383.2	traX	-0.57761	4.44501e-05	conjugal transfer pilus acetylation protein TraX
												AAP17066.1	cds1517	-0.578815	0.000840363	IS2 orfB
												AAP17230.1	cds1679	-0.578863	5.11886e-05	IS629 orfB
												AAP17629.1	eco	-0.579023	6.54469e-05	ecotin%2C serine protease inhibitor
												AAP18565.1	yhdA	-0.57934	3.6789e-05	hypothetical protein
												AAP18973.1	yidK	-0.579422	0.000841949	putative cotransporter
												AAP16244.1	moaB	-0.580082	3.57142e-05	molybdopterin biosynthesis protein B
												AAP18065.1	hypE	-0.580495	8.31701e-05	hypE product
												AAP17014.1	ydiQ	-0.580746	0.000601121	putative transport protein
												AAP18033.1	ygaG	-0.581658	3.42692e-05	hypothetical protein
												AAP19395.1	yjiH	-0.581858	0.0018911	hypothetical protein
												AAP18280.1	cds2732	-0.582299	0.000194604	hypothetical protein
												AAP19060.1	yicG	-0.58278	0.000156807	hypothetical protein
												AAP19538.1	yjfM	-0.582782	0.00020762	hypothetical protein
												AAP18059.1	hycB	-0.582988	0.0225993	probable small subunit of hydrogenase-3%2C iron-sulfur protein (part of formate hydrogenlyase (FHL) complex)
												AAP16955.1	cds1406	-0.583059	7.48669e-05	hypothetical protein
												AAP18812.1	yihT	-0.584168	0.000202289	putative aldolase
												AAP15808.1	rhsG	-0.584221	3.90334e-05	putative Rhs-family protein
												AAP17643.1	cds2096	-0.584417	0.00114681	hypothetical protein
												AAP17138.1	cds1589	-0.58486	7.77879e-05	hypothetical protein
												AAP16927.1	yeaO	-0.585513	4.40047e-05	hypothetical protein
												AAP17509.1	gatR	-0.586011	4.32042e-05	galactitol utilization operon repressor
												AAP16367.1	cds819	-0.587458	0.011418	putative bacteriophage protein
												AAP17498.1	cds1947	-0.587548	9.85131e-05	hypothetical protein
												AAP19569.1	hpaC	-0.588292	0.000201872	component C of the 4HPA-hydroxylase
												AAP16590.1	flgE	-0.590835	0.000253566	flagellar hook protein FlgE
												AAP16696.1	cds1147	-0.593071	0.000475015	putative ATP-binding protein of ABC transporter
												AAP18181.1	ygfU	-0.593564	0.000568108	putative permease
												AAP17357.1	cds1806	-0.593722	9.08223e-05	resistance protein
												AAP19170.1	yhjM	-0.593727	0.000116809	putative endoglucanase
												AAP18241.1	sprT	-0.594552	7.73364e-05	hypothetical protein
												NP_858281.1	spa15	-0.595307	2.10656e-05	Mxi-Spa secretion machinery protein Spa15
												AAP17257.1	cds1706	-0.59546	0.00187495	ISSfl4 orf
												NP_858313.2	cds4224	-0.596276	2.31538e-05	IS629 ORF1
												AAP16421.1	ycaL	-0.599294	4.50731e-05	putative heat shock protein
												AAP17271.1	cds1720	-0.599684	0.000147497	IS1 orfB
												AAP18119.1	syd	-0.600198	2.49071e-05	Syd protein
												AAP17702.1	cds2154	-0.600655	1.97249e-05	hypothetical protein
												AAP16728.1	narJ	-0.60095	3.68203e-05	nitrate reductase 1%2C delta subunit
												AAP19140.1	yhiW	-0.601147	9.44057e-05	putative ARAC-type regulatory protein
												AAP17705.1	yfcC	-0.602169	2.89695e-05	putative S-transferase
												AAP17208.1	fdnH	-0.602817	0.000124354	formate dehydrogenase-N%2C nitrate-inducible%2C iron-sulfur beta subunit
												AAP18447.1	yhaE	-0.602945	0.000181087	putative dehydrogenase
												AAP17406.1	cds1855	-0.603146	0.00612811	putative crossover junction endodeoxyribonuclease
												AAP17059.1	cds1510	-0.603537	0.000140575	IS2 orfB
												AAP16783.1	osmB	-0.603665	1.70395e-05	osmotically inducible lipoprotein
												AAP17810.1	cds2262	-0.604168	0.000422086	hypothetical protein
												AAP16070.1	pnuC	-0.604329	2.60344e-05	PnuC protein
												AAP16565.1	cds1017	-0.604433	0.000528287	IS600 orfA
												AAP17139.1	cds1590	-0.604823	3.04339e-05	putative membrane protein
												AAP16675.1	ycgL	-0.60484	1.89716e-05	hypothetical protein
												AAP18302.1	cds2754	-0.605105	0.000353181	hypothetical protein
												AAP16526.1	cds978	-0.605823	0.00155077	hypothetical protein
												AAP16753.1	tonB	-0.606232	1.61933e-05	membrane protein%2C energy transducer
												AAP17501.1	yegO	-0.606295	3.89979e-05	hypothetical protein
												AAP16591.1	flgG	-0.606674	8.2809e-05	flagellar basal body rod protein flgG
												AAP17090.1	cds1541	-0.606871	2.09774e-05	hypothetical protein
												AAP17569.1	cds2022	-0.606975	0.000407486	hypothetical protein
												AAP15962.1	ybaS	-0.60702	0.00106023	putative glutaminase
												AAP18813.1	yihS	-0.607345	7.40473e-05	hypothetical protein
												AAP18460.1	agaD	-0.608639	8.59906e-05	N-acetylglucosamine transport enzyme IID component 1
												AAP19219.1	yhiJ	-0.608732	6.32936e-05	hypothetical protein
												AAP19449.1	yjgG	-0.609713	0.000596396	hypothetical protein
												NP_858364.1	cds4273	-0.611267	7.60216e-05	IS629 ORF1
												AAP18358.1	cds2810	-0.611614	0.00194758	hypothetical protein
												AAP18810.1	yihV	-0.612348	2.69815e-05	putative kinase
												AAP18213.1	yggB	-0.613885	1.21061e-05	putative transport protein
												AAP18709.1	thiG	-0.613983	1.1786e-05	thiamin biosynthesis protein%2C thiazole moiety
												AAP18959.1	yicO	-0.615144	0.00120304	hypothetical protein
												AAP18465.1	cds2916	-0.616592	0.000827406	IS2 orfB
												AAP18728.1	yijC	-0.61681	1.15453e-05	hypothetical protein
												AAP18481.1	yhbV	-0.617041	3.34996e-05	hypothetical protein
												AAP17137.1	slyA	-0.617158	1.10149e-05	transcriptional regulator
												AAP16983.1	cds1434	-0.618209	2.36419e-05	hypothetical protein
												AAP19405.1	gntP	-0.618427	7.91915e-05	gluconate transport system permease 3
												AAP17184.1	cds1633	-0.620551	0.000146331	putative transport system permease protein
												NP_858307.1	cds4218	-0.622446	2.12991e-05	transposase
												AAP17239.1	yebF	-0.622948	9.01726e-06	hypothetical protein
												AAP18528.1	yhbL	-0.623519	1.28725e-05	sigma cross-reacting protein 27A (SCRP-27A)
												AAP16475.1	cds927	-0.623947	2.64661e-05	IS2 orfB
												AAP16886.1	cds1337	-0.623984	0.000319869	IS600 orfB
												AAP17749.1	yfdC	-0.624238	3.29996e-05	putative transport protein
												AAP16978.1	ydjC	-0.624706	1.7867e-05	hypothetical protein
												AAP18680.1	sorC	-0.625733	7.0532e-05	probable sor-operon regulator
												AAP16582.1	yceH	-0.625807	9.55022e-06	hypothetical protein
												NP_858284.1	spa32	-0.627148	7.45237e-06	Mxi-Spa secretion machinery protein Spa32
												AAP15692.1	yadR	-0.627733	7.81618e-06	hypothetical protein
												AAP18153.1	mutH	-0.627985	1.13577e-05	methyl-directed mismatch repair protein
												NP_858305.1	cds4216	-0.628025	1.20341e-05	IS629 ORF2
												AAP15749.1	sat1	-0.628207	2.67307e-05	putative cytoplasmic protein
												AAP15748.1	cds200	-0.628533	6.6348e-05	putative cytoplasmic protein
												AAP19189.1	yhiF	-0.62882	0.000234299	hypothetical protein
												AAP18432.1	yhaK	-0.629301	4.15419e-05	hypothetical protein
												AAP16448.1	ycbN	-0.630571	0.00013739	hypothetical protein
												NP_858229.2	cds4145	-0.630692	1.78232e-05	IS91 ORF2
												AAP19502.1	yjeI	-0.631493	7.20839e-06	hypothetical protein
												AAP19000.1	tnaA	-0.632733	2.33124e-05	tryptophanase
												AAP15977.1	gip	-0.632986	0.00117563	glyoxylate-induced protein
												AAP18313.1	cds2765	-0.633043	4.49719e-05	putative class II aminotransferase
												AAP18651.1	yjcQ	-0.633426	4.85867e-05	putative enzyme
												AAP16902.1	cds1353	-0.633499	0.00013739	IS1 orfB
												AAP17309.1	cds1758	-0.633894	7.16738e-05	hypothetical protein
												AAP16487.1	hyaA	-0.634203	4.30709e-05	hydrogenase-1 small subunit
												AAP19455.1	treR	-0.634594	1.01467e-05	repressor of treA%2CB%2CC
												AAP19614.1	cds4064	-0.636083	5.63344e-06	phosphoglyceromutase 2
												NP_858165.1	parB	-0.636447	5.60212e-06	plasmid segregation protein
												AAP18212.1	yggA	-0.636575	1.27226e-05	hypothetical protein
												NP_858208.1	cds4122	-0.636943	2.28945e-05	IS630 orf
												AAP17654.1	glpQ	-0.637217	8.31866e-06	glycerophosphodiester phosphodiesterase
												AAP19155.1	yhjY	-0.63722	2.30288e-05	putative lipase
												AAP18170.1	cds2622	-0.637434	1.67057e-05	hypothetical protein
												AAP19406.1	fimH	-0.638496	3.37474e-05	minor fimbrial subunit%2C D-mannose specific adhesin
												AAP17366.1	fliO	-0.638962	0.00085538	flagellar protein FliO
												AAP19133.1	yiaA	-0.639722	2.70726e-05	hypothetical protein
												AAP18799.1	yiiF	-0.639744	9.80143e-05	hypothetical protein
												AAP15745.1	cds197	-0.640293	0.00597098	hypothetical protein
												NP_858160.2	cds4078	-0.640737	6.16259e-06	IS100 ORF1
												AAP19129.1	xylG	-0.640804	2.38776e-05	putative ATP-binding protein of xylose transport system
												AAP17331.1	cds1780	-0.6414	0.000510895	hypothetical protein
												AAP17322.1	motA	-0.643076	0.000764094	proton conductor component of motor
												AAP17508.1	cds1957	-0.643382	9.26385e-06	hypothetical protein
												AAP17157.1	cfa	-0.6472	4.01693e-06	cyclopropane fatty acyl phospholipid synthase
												AAP18627.1	yjbQ	-0.647242	4.456e-06	hypothetical protein
												AAP17767.1	cds2219	-0.647711	6.8981e-06	putative 2-component transcriptional regulator
												AAP19503.1	yjeJ	-0.648014	4.54763e-06	hypothetical protein
												AAP16979.1	katE	-0.649049	4.47264e-06	catalase%3B hydroperoxidase HPII(III)
												AAP17964.1	trxC	-0.649381	5.23385e-06	putative thioredoxin-like protein
												AAP17233.1	cds1682	-0.64974	3.74268e-06	hypothetical protein
												AAP18982.1	yidS	-0.651476	0.0002193	hypothetical protein
												AAP17979.1	pheL	-0.653092	0.000156165	leader peptide of chorismate mutase-P-prephenate dehydratase
												AAP17223.1	cds1672	-0.653551	5.07745e-06	hypothetical protein
												AAP17408.1	cds1857	-0.654235	2.99878e-06	hypothetical bacteriophage protein
												AAP19483.1	ytfB	-0.654672	4.99993e-06	hypothetical protein
												AAP19208.1	cds3659	-0.654771	0.00913903	IS1 orfB
												AAP18774.1	cds3225	-0.655797	2.94866e-06	hypothetical protein
												AAP17892.1	cds2344	-0.656656	0.00913903	ISSfl4 orf
												AAP15851.1	cds302	-0.656693	0.00174958	IS600 orfB
												AAP18312.1	cds2764	-0.657445	4.20367e-05	hypothetical protein
												AAP19191.1	cds3642	-0.657492	4.9933e-05	hypothetical protein
												AAP18984.1	dgoK	-0.658096	5.53862e-06	2-oxo-3-deoxygalactonate kinase
												AAP18294.1	yeeS	-0.658317	5.93454e-05	putative RADC family DNA repair protein
												NP_858197.1	cds4111	-0.658334	1.23672e-05	IS1 encoded protein
												AAP15585.1	fixA	-0.65865	3.49993e-05	probable flavoprotein subunit
												AAP16438.1	ycbK	-0.660016	2.73171e-06	hypothetical protein
												AAP16140.1	ybeU	-0.660523	5.79385e-05	putative tRNA ligase
												AAP18783.1	rhaS	-0.660817	6.50215e-05	positive regulator for rhaBAD operon
												AAP18451.1	agaZ	-0.661179	4.05097e-06	putative tagatose 6-phosphate kinase 2
												AAP19543.1	yjfO	-0.661694	1.11665e-05	hypothetical protein
												AAP17435.1	cds1884	-0.662278	3.5165e-06	hypothetical protein
												AAP17215.1	narU	-0.662369	4.38933e-05	nitrite extrusion protein 2
												AAP16096.1	ybgQ	-0.663114	2.30763e-05	putative outer membrane protein
												NP_858253.1	cds4166	-0.663217	1.13199e-05	ISSfl2 ORF
												AAP17118.1	cds1569	-0.664633	1.24243e-05	hypothetical protein
												AAP16460.1	ycbW	-0.66496	2.35289e-06	hypothetical protein
												AAP16111.1	kdpA	-0.665546	5.83398e-05	ATPase of high-affinity potassium transport system%2C A chain
												AAP17161.1	cds1610	-0.665925	2.20571e-06	hypothetical protein
												AAP19049.1	cds3500	-0.666363	2.8228e-06	putative integrase
												NP_858210.1	cds4124	-0.66653	3.38427e-06	iso-IS1 ORF2
												AAP16106.1	cds557	-0.666933	4.96713e-05	hypothetical protein
												AAP17285.1	cds1734	-0.667773	0.00337676	IS911 orfB
												NP_858264.1	ipgA	-0.667876	1.92746e-06	chaperone IpgA
												AAP18335.1	cds2787	-0.668336	5.66688e-05	hypothetical protein
												AAP16564.1	cds1016	-0.669432	0.00189062	IS629 orfB
												AAP18656.1	phnD	-0.669829	2.83318e-06	periplasmic binding protein component of phosphonate transporter
												AAP17409.1	cds1858	-0.672525	1.56525e-06	putative cell killing protein of prophage
												AAP18628.1	yjbR	-0.673413	2.05868e-06	hypothetical protein
												NP_858343.1	cds4254	-0.674231	2.37156e-06	iso-IS1 ORF1
												AAP19509.1	blc	-0.674454	6.89478e-06	outer membrane lipoprotein (lipocalin)
												AAP15790.1	is600a	-0.67588	0.00231606	IS600 orfA
												AAP18615.1	lexA	-0.676662	1.52079e-06	regulator for SOS(lexA) regulon
												AAP17075.1	cds1526	-0.67667	1.46541e-05	hypothetical protein
												AAP15924.1	cof	-0.676946	3.27923e-06	hypothetical protein
												AAP17288.1	cds1737	-0.67758	1.15323e-05	putative Q antiterminator encoded by prophage CP-933P
												NP_858304.1	cds4215	-0.67772	7.60564e-05	IS629 ORF1
												AAP16578.1	yceB	-0.678325	1.57221e-06	hypothetical protein
												AAP15831.1	pepD	-0.679828	1.38192e-06	aminoacyl-histidine dipeptidase (peptidase D)
												AAP18014.1	cds2466	-0.679875	0.00381132	IS2 orfB
												AAP17074.1	cds1525	-0.679949	2.93926e-06	hypothetical protein
												AAP16555.1	cds1007	-0.679998	2.92619e-06	hypothetical protein
												AAP15906.1	cyoC	-0.680958	2.32128e-05	cytochrome o ubiquinol oxidase subunit III
												AAP15722.1	yaeO	-0.681748	1.52007e-06	hypothetical protein
												NP_858391.1	repB	-0.682046	1.23312e-06	replication protein
												AAP18707.1	thiE	-0.682133	1.16588e-06	thiamin biosynthesis protein%2C thiazole moiety
												AAP17817.1	cds2269	-0.682407	0.000531061	hypothetical protein
												AAP15905.1	cyoD	-0.682457	6.48848e-05	cytochrome o ubiquinol oxidase subunit IV
												AAP18342.1	cds2794	-0.686169	3.32379e-06	hypothetical protein
												AAP18682.1	sorF	-0.687838	0.000811863	putative sorbose-permease PTS system IIA component
												AAP16450.1	ycbP	-0.688681	6.35634e-05	hypothetical protein
												AAP15865.1	cds316	-0.688976	6.18586e-06	hypothetical protein
												AAP19508.1	sugE	-0.689177	2.12931e-06	suppresser of groEL
												AAP17308.1	flhB	-0.689969	2.34077e-05	putative part of export apparatus for flagellar proteins
												AAP15781.1	yaiB	-0.690405	1.39991e-06	hypothetical protein
												NP_858279.1	mxiC	-0.690875	8.16512e-07	Mxi-Spa secretion machinery protein
												AAP16052.1	citC	-0.691404	1.73334e-05	citrate lyase synthetase (citrate (pro-3S)-lyase ligase
												NP_858371.1	msbB2	-0.692492	8.22091e-07	lipid A biosynthesis (KDO)2-(lauroyl)-lipid IVA acyltransferase
												AAP17538.1	yehR	-0.693573	0.000222338	hypothetical protein
												NP_858312.1	cds4223	-0.693864	7.82179e-07	IS629 ORF2
												AAP16345.1	cspD	-0.694033	7.75079e-07	cold shock protein
												AAP16931.1	yeaK	-0.694826	1.21631e-06	hypothetical protein
												AAP16333.1	cds784	-0.694831	3.93095e-05	putative enzyme
												NP_858360.1	ospG	-0.695024	7.49539e-07	protein OspG
												AAP18606.1	malF	-0.69523	4.01497e-06	part of maltose permease
												NP_858272.1	mxiJ	-0.695415	6.90743e-07	Mxi-Spa secretion machinery protein MxiJ
												AAP19291.1	feoA	-0.696685	7.66318e-07	ferrous iron transport protein A
												AAP18554.1	yhcP	-0.696959	3.15112e-06	hypothetical protein
												AAP16360.1	dmsC	-0.698889	6.83988e-06	anaerobic dimethyl sulfoxide reductase subunit C
												AAP19448.1	yjgH	-0.700954	1.678e-05	hypothetical protein
												AAP16522.1	cds974	-0.701974	0.000259645	putative enzyme
												AAP18782.1	rhaR	-0.701993	3.92425e-06	positive regulator for rhaRS operon
												AAP19204.1	yhiO	-0.702173	3.22775e-06	hypothetical protein
												AAP17432.1	cds1881	-0.702732	0.0010139	IS629 orfA
												AAP17290.1	cds1739	-0.704354	0.000139933	IS600 orfB
												AAP16012.1	ybdK	-0.704769	2.40058e-06	hypothetical protein
												AAP17015.1	cds1466	-0.705052	1.00594e-06	putative ARAC-type regulatory protein
												AAP17024.1	cds1475	-0.706126	3.78329e-05	hypothetical protein
												NP_858321.1	cds4232	-0.707428	5.93047e-07	reverse transcriptase
												AAP17265.1	cds1714	-0.707688	0.0061555	putative bacteriophage protein
												AAP17300.1	bisZ	-0.708558	7.0915e-07	biotin sulfoxide reductase 2
												AAP18710.1	thiH	-0.708606	4.34731e-07	thiamin biosynthesis protein%2C thiazole moiety
												NP_858334.1	cds4245	-0.709464	0.000489657	hypothetical protein
												AAP16107.1	rhsE	-0.71259	1.351e-06	putative Rhs-family protein
												AAP16639.1	cds1090	-0.712712	4.81667e-06	hypothetical bacteriophage protein
												AAP15910.1	cds361	-0.713405	9.64843e-07	ISSfl3 orfB
												AAP17071.1	cds1522	-0.713833	4.34535e-07	hypothetical protein
												AAP18339.1	cds2791	-0.714566	4.05134e-07	hypothetical protein
												AAP16530.1	cds982	-0.714942	0.0033436	putative cytochrome
												AAP16554.1	cds1006	-0.715018	4.11022e-07	putative membrane protein
												AAP18638.1	yjcF	-0.71595	1.12614e-05	hypothetical protein
												AAP18480.1	yhbU	-0.717689	1.69735e-06	putative collagenase
												AAP18670.1	melA	-0.717802	8.67883e-07	alpha-galactosidase
												NP_858167.2	cds4083	-0.717912	4.92668e-07	hypothetical protein
												AAP18340.1	exbD	-0.718374	3.22817e-07	enterochelin transporter (uptake)
												AAP18341.1	exbB	-0.718785	3.04841e-07	enterochelin transporter (uptake)
												NP_858375.1	cds4282	-0.719762	5.53404e-07	IS600 ORF1
												NP_858267.1	ipgE	-0.72099	2.69237e-07	IpgE%2C cytoplasmic chaperone for IpgD
												NP_858387.1	cds4293	-0.721416	9.27379e-07	IS600 ORF2
												AAP18258.1	yggM	-0.721935	5.79389e-05	putative alpha helix chain
												AAP18282.1	cds2734	-0.723329	4.88833e-05	IS2 orfB
												AAP16749.1	kch	-0.724542	4.9558e-07	putative potassium channel protein
												AAP19014.1	yieL	-0.726016	1.13758e-06	putative xylanase
												AAP15973.1	ybbS	-0.729519	2.85074e-05	putative transcriptional regulator LYSR-type
												AAP19484.1	ytfA	-0.729733	5.30091e-07	hypothetical protein
												NP_858271.1	mxiI	-0.730084	1.91065e-07	Mxi-Spa secretion machinery protein MxiI
												NP_858218.1	cds4132	-0.730795	5.85918e-07	IS100 ORF2
												AAP16166.1	dcuC	-0.731679	1.26306e-06	C4-dicarboxylate anaerobic carrier DcuC
												AAP16387.1	cds839	-0.731736	6.55858e-07	putative exodeoxyribonuclease VIII of prophage CP-933R
												AAP18594.1	cds3045	-0.732028	0.000433014	ISSfl3 orfA
												AAP17653.1	yfaH	-0.733317	1.24427e-05	hypothetical protein
												AAP17396.1	cds1845	-0.733905	4.7475e-07	putative tail protein
												AAP17669.1	cds2121	-0.734766	1.11122e-06	hypothetical protein
												AAP16975.1	cds1426	-0.735406	0.00096728	IS1 orfB
												AAP17318.1	tar	-0.73719	1.0116e-05	methyl-accepting chemotaxis protein II%2C aspartate sensor receptor
												AAP16391.1	ipaH_2	-0.737805	6.81217e-06	invasion plasmid antigen
												YP_145811.1	cds4107	-0.73863	4.67315e-05	hypothetical protein
												AAP19167.1	yhjR	-0.741341	2.42887e-06	hypothetical protein
												NP_858345.1	cds4256	-0.741406	4.4304e-07	ISSfl4 ORF2
												AAP17088.1	ynfL	-0.741963	1.65842e-07	putative LYSR-type transcriptional regulator
												AAP17826.1	tktB	-0.742013	1.67768e-07	transketolase 2 isozyme
												AAP18295.1	yeeT	-0.746182	0.000198059	hypothetical protein
												AAP19553.1	yjfY	-0.747154	6.11969e-05	hypothetical protein
												AAP19179.1	yhjC	-0.74751	2.7162e-07	putative transcriptional regulator LYSR-type
												AAP17568.1	sanA	-0.747713	6.48022e-07	vancomycin resistance protein
												AAP17869.1	cds2321	-0.748182	1.00691e-07	putative arsenical resistance protein
												AAP15801.1	ykgH	-0.749242	5.98248e-06	hypothetical protein
												NP_858319.1	cds4230	-0.749932	1.25894e-07	hypothetical protein
												AAP16699.1	treA	-0.750338	5.64188e-07	trehalase
												AAP16885.1	cds1336	-0.75037	0.0016695	IS600 orfA
												AAP18075.1	cds2527	-0.751107	8.75664e-05	putative DNA-binding protein
												AAP18091.1	iap	-0.751233	1.1142e-07	alkaline phosphatase isozyme conversion%2C aminopeptidase
												NP_858376.1	traD	-0.752158	1.23179e-07	DNA transport protein
												AAP16016.1	cds467	-0.752515	2.90319e-07	hypothetical protein
												AAP16377.1	cds829	-0.75267	6.46004e-06	putative bacteriophage protein
												AAP18666.1	yjdE	-0.754215	3.79603e-06	putative amino acid/amine transport protein
												AAP16673.1	cds1124	-0.754372	0.00107866	IS3 orfA
												AAP18662.1	proP	-0.756436	7.11526e-08	low-affinity transport protein%3B proline permease II
												AAP17034.1	ydfI	-0.756883	1.65839e-07	putative oxidoreductase
												AAP16378.1	cds830	-0.757385	5.87105e-06	putative regulator of cell division encoded by prophage CP-933O
												AAP17801.1	yfeT	-0.758166	2.1841e-07	hypothetical protein
												AAP19619.1	cds4069	-0.75836	3.52263e-07	inner membrane protein CreD
												AAP17353.1	cds1802	-0.759806	1.7648e-06	putative virulence protein
												NP_858138.1	ospC4	-0.760462	6.37456e-08	OspC4
												AAP16253.1	ybhQ	-0.760502	9.30769e-08	hypothetical protein
												AAP15603.1	araA	-0.760528	6.00921e-07	L-arabinose isomerase
												AAP15556.1	yaaH	-0.760602	1.19713e-07	hypothetical protein
												AAP18555.1	yhcQ	-0.761296	3.59917e-07	putative membrane protein
												AAP16651.1	cds1102	-0.76459	5.54836e-06	hypothetical bacteriophage protein
												AAP17981.1	tyrA	-0.764729	5.29376e-08	chorismate mutase-T and prephenate dehydrogenase
												AAP16000.1	ylcC	-0.765769	1.44684e-05	hypothetical protein
												NP_858320.1	cds4231	-0.766654	7.89799e-08	hypothetical protein
												AAP18553.1	yhcO	-0.767449	4.31995e-05	hypothetical protein
												AAP18652.1	yjcR	-0.767691	1.59281e-06	putative membrane protein
												AAP16544.1	cds996	-0.767752	1.88369e-06	IS600
												AAP15648.1	cds100	-0.769525	2.58079e-07	hypothetical protein
												AAP18214.1	fba	-0.770542	3.97483e-08	fructose-bisphosphate aldolase%2C class II
												AAP19210.1	cds3661	-0.771142	8.32043e-07	hypothetical protein
												AAP16296.1	yliJ	-0.771284	4.68309e-08	putative transferase
												AAP17207.1	fdnI	-0.772296	1.51482e-07	formate dehydrogenase-N%2C nitrate-inducible%2C cytochrome B556(Fdn) gamma subunit
												AAP17631.1	alkB	-0.774519	1.19288e-06	alkylated DNA repair protein
												AAP16798.1	aldH	-0.776196	6.16515e-07	aldehyde dehydrogenase
												AAP17913.1	yphA	-0.776226	9.40467e-07	hypothetical protein
												NP_858254.1	cds4167	-0.777294	1.12059e-07	IS100 ORF1
												AAP17344.1	fliZ	-0.777615	4.03036e-06	putative regulator of FliA
												AAP16922.1	cds1373	-0.779145	6.93931e-08	putative repressor protein
												AAP18596.1	cds3047	-0.779334	3.45877e-08	ISSfl3 orfC
												AAP19209.1	cds3660	-0.779593	0.000168652	IS600 orfA
												AAP16838.1	cds1289	-0.779712	5.37893e-07	hypothetical protein
												AAP17429.1	yeeX	-0.780008	2.97734e-08	putative alpha helix protein
												AAP16619.1	ndh	-0.780741	3.96338e-08	respiratory NADH dehydrogenase
												AAP16510.1	torC	-0.781629	2.7222e-06	trimethylamine N-oxide reductase%2C cytochrome c-type subunit
												AAP16159.1	ybeF	-0.782099	1.07949e-07	lysR-family transcriptional regulator
												AAP17307.1	flhE	-0.783176	1.60421e-06	flagellar protein
												NP_858180.1	cds4095	-0.78443	3.64098e-08	IS2 ORF2
												AAP18287.1	sap	-0.784788	1.03048e-05	hypothetical protein
												AAP19122.1	yiaK	-0.784834	3.34539e-06	putative dehydrogenase
												NP_858293.1	cds4206	-0.785425	4.88133e-07	IS1294 transposase
												AAP19326.1	yhfN	-0.785696	1.73584e-05	putative transport protein
												AAP18230.1	yggG	-0.787215	2.41291e-08	hypothetical protein
												AAP18622.1	qor	-0.787484	3.51963e-08	quinone oxidoreductase
												AAP18080.1	nlpD	-0.78763	1.96792e-08	lipoprotein
												AAP15884.1	yajI	-0.788241	3.60439e-08	hypothetical protein
												AAP15914.1	bolA	-0.788355	3.60167e-08	possible regulator of murein genes
												AAP17042.1	cds1493	-0.789382	8.04317e-06	IS600
												AAP19132.1	yiaB	-0.795339	2.14613e-06	hypothetical protein
												AAP17567.1	cdd	-0.795962	3.21589e-08	cytidine/deoxycytidine deaminase
												AAP17089.1	asr	-0.796365	2.30834e-06	acid shock protein
												AAP19139.1	cds3590	-0.797608	4.40035e-06	hypothetical protein
												AAP19111.1	yibH	-0.797937	2.34829e-06	putative membrane protein
												AAP15764.1	cds216	-0.798411	0.00189892	putative terminase large subunit
												AAP17039.1	ydeJ	-0.798553	4.18926e-08	hypothetical protein
												AAP18211.1	yggE	-0.799731	1.38528e-08	putative actin
												AAP18667.1	adiY	-0.79983	0.000131829	putative ARAC-type regulatory protein
												AAP16029.1	entB	-0.800053	4.33484e-08	2%2C3-dihydro-2%2C3-dihydroxybenzoate synthetase%2C isochroismatase
												AAP19228.1	nikB	-0.800131	1.51164e-05	transport of nickel%2C membrane protein
												NP_858174.1	cds4089	-0.800605	6.01239e-08	IS150 ORF B
												AAP18390.1	ttdA	-0.80184	1.95179e-05	L-tartrate dehydratase%2C subunit A
												AAP17211.1	cds1660	-0.802511	2.58059e-07	putative outer membrane porin protein
												AAP19542.1	yjfN	-0.803728	3.56268e-08	hypothetical protein
												NP_858261.1	ipaB	-0.804209	9.88388e-09	IpaB%2C secreted by the Mxi-Spa secretion machinery%2C required for entry into epithelial cells
												AAP17499.1	cds1948	-0.804335	1.34358e-06	hypothetical protein
												AAP18975.1	glvB	-0.805459	7.47036e-05	PTS system%2C arbutin-like IIB component
												AAP16015.1	cds466	-0.806512	1.80961e-08	hypothetical protein
												AAP17048.1	ydeB	-0.806655	2.16254e-08	hypothetical protein
												AAP16825.1	ycjZ	-0.807725	2.12447e-08	putative LYSR-type transcriptional regulator
												NP_858366.1	cds4275	-0.807905	9.0687e-09	IS3 ORF2
												AAP16799.1	ordL	-0.808309	2.15249e-07	probable oxidoreductase
												AAP19408.1	fimF	-0.808541	3.67738e-06	minor fimbrial subunit%2C precursor polypeptide
												NP_858365.1	cds4274	-0.808782	2.64639e-08	IS629 ORF2
												AAP17359.1	fliG	-0.810139	1.92665e-06	flagellar motor switch protein FliG
												NP_858328.1	stbA	-0.810564	7.85401e-09	plasmid stable inheritance protein
												AAP16400.1	cds852	-0.810929	1.38305e-07	putative lysozyme protein R of prophage CP-933K
												AAP18597.1	lysC	-0.811407	7.53152e-09	aspartokinase III
												AAP18016.1	cds2468	-0.811881	2.2702e-08	hypothetical protein
												NP_858219.1	cds4133	-0.813191	8.87192e-09	hypothetical protein
												AAP16473.1	cds925	-0.814269	1.54329e-08	hypothetical protein
												AAP18018.1	stpA	-0.815111	8.94142e-09	DNA-binding protein%3B H-NS-like protein
												AAP15768.1	cds220	-0.815212	2.3972e-07	putative coat protein
												AAP18006.1	cds2458	-0.816145	0.00010166	hypothetical protein
												NP_858173.1	cds4088	-0.817242	7.87667e-05	IS629 ORF1
												AAP17416.1	cds1865	-0.81828	1.50977e-08	IS600 orfA
												AAP17588.1	fruA	-0.818788	6.22932e-09	PTS system%2C fructose-specific transport protein
												AAP16531.1	ycdO	-0.818983	2.64837e-07	hypothetical protein
												AAP18277.1	cds2729	-0.819512	5.16655e-05	IS629 orfA
												AAP18049.1	ygaA	-0.82061	8.62336e-09	putative 2-component transcriptional regulator
												AAP18865.1	yigI	-0.820805	9.51269e-09	hypothetical protein
												AAP16887.1	cds1338	-0.821601	1.20979e-08	hypothetical protein
												AAP17899.1	yfhF	-0.822546	5.02049e-09	putative regulator
												NP_858336.1	cds4247	-0.823782	7.74654e-09	transposase
												NP_858189.1	cds4102	-0.823835	2.48675e-08	IS629 ORF2
												AAP17077.1	cds1528	-0.823941	5.0727e-06	hypothetical protein
												NP_858273.1	mxiK	-0.826323	3.94795e-09	Mxi-Spa secretion machinery protein MxiK
												AAP18192.1	cds2644	-0.827545	4.84287e-09	putative oxidoreductase
												AAP17043.1	ydeF	-0.829557	1.85781e-07	putative transport protein
												AAP17266.1	cds1715	-0.830589	1.33837e-08	putative exodeoxyribonuclease VIII
												AAP16221.1	cds672	-0.832047	8.49236e-09	putative tail component of prophage CP-933K
												AAP17917.1	yphE	-0.832507	1.36723e-07	putative ATP-binding component of a transport system
												AAP15771.1	cds223	-0.832889	2.82234e-08	putative packaged DNA stabilization protein
												AAP17485.1	wcaF	-0.832984	6.70129e-07	putative transferase
												AAP16557.1	cds1009	-0.832988	2.33096e-05	IS629 orfA
												AAP16300.1	ybjG	-0.834339	3.89162e-09	hypothetical protein
												NP_858270.1	mxiH	-0.834435	2.80573e-09	Mxi-Spa secretion machinery protein MxiH
												AAP16589.1	flgD	-0.834777	1.04066e-05	flagellar hook formation protein FlgD
												AAP15823.1	fhiA	-0.837207	1.82519e-07	flagellar biosynthetic protein FlhA
												AAP15770.1	cds222	-0.839793	8.81829e-05	putative DNA stabilization protein
												NP_858212.1	ipaH4	-0.840131	2.386e-09	invasion plasmid antigen
												NP_858240.1	cds4153	-0.841195	5.0624e-08	IS600 ORF2
												AAP16375.1	cds827	-0.841378	1.95049e-08	putative bacteriophage protein
												AAP17427.1	is629a	-0.841536	8.80271e-06	IS629 orfA
												AAP16823.1	cds1274	-0.84227	1.9057e-08	hypothetical protein
												AAP16532.1	ycdB	-0.843117	2.0268e-08	hypothetical protein
												AAP15900.1	cds351	-0.848142	0.00145358	IS1 orfA
												AAP17217.1	cds1666	-0.848742	3.23786e-09	hypothetical protein
												AAP15822.1	yafM	-0.849076	6.77747e-07	hypothetical protein
												AAP16562.1	cds1014	-0.849706	6.5941e-06	IS2 orfB
												AAP16859.1	cds1310	-0.851244	2.91185e-08	hypothetical protein
												AAP18311.1	cds2763	-0.852672	9.73958e-07	hypothetical protein
												AAP16327.1	cds778	-0.853803	2.00131e-09	hypothetical protein
												AAP17827.1	cds2279	-0.854552	1.30441e-09	hypothetical protein
												AAP15747.1	safC	-0.855771	1.30037e-08	outer membrane usher protein
												AAP17328.1	araG	-0.856486	1.46314e-08	L-arabinose transport ATP-binding protein
												AAP18632.1	cds3083	-0.857988	8.46924e-07	IS1 orfA
												NP_858274.2	mxiN	-0.858063	1.00063e-09	Mxi-Spa secretion machinery protein MxiN
												AAP15605.1	araC	-0.858131	1.26758e-09	transcriptional regulator for ara operon
												AAP16523.1	cds975	-0.858819	3.17602e-07	putative acetyltransferase
												AAP18010.1	gabP	-0.85926	1.41544e-07	transport permease protein of gamma-aminobutyrate
												AAP16839.1	cds1290	-0.860561	2.18132e-07	putative secretion protein
												NP_858388.1	cds4294	-0.861327	0.000113376	IS600 ORF1
												NP_858400.1	cds4307	-0.861339	4.95689e-09	IS600 ORF1
												AAP18578.1	yhdW	-0.861705	1.08674e-08	putative periplasmic binding transport protein
												AAP18169.1	cds2621	-0.863352	0.000871995	IS3 orfB
												AAP18655.1	phnE	-0.865466	6.93178e-08	membrane channel protein component of phosphonate transporter
												AAP16342.1	ybjX	-0.866256	7.49512e-10	putative enzyme
												AAP15903.1	cds354	-0.868323	6.70011e-10	hypothetical protein
												AAP16047.1	citG	-0.869019	1.90408e-07	hypothetical protein
												AAP16560.1	cds1012	-0.869623	5.02587e-09	hypothetical bacteriophage protein
												AAP15647.1	guaC	-0.872753	6.83671e-10	GMP reductase
												AAP16162.1	ybeM	-0.877643	7.38855e-09	putative amidase
												AAP18605.1	malG	-0.879517	1.21572e-08	part of maltose permease
												AAP17940.1	cds2392	-0.879843	1.05714e-07	putative bacteriophage protein
												AAP19041.1	cds3492	-0.879858	3.09911e-06	IS2 orfB
												AAP17577.1	lysP	-0.880067	4.10349e-10	lysine-specific permease
												AAP16525.1	cds977	-0.880801	3.95651e-07	putative synthetase
												AAP17820.1	cds2272	-0.881644	1.64532e-09	IS1N orfB
												AAP19043.1	cds3494	-0.881892	1.49455e-05	IS629 orfB
												AAP19169.1	yhjN	-0.882757	4.13462e-09	hypothetical protein
												AAP18727.1	yijD	-0.884767	3.91395e-10	hypothetical protein
												NP_858389.1	cds4295	-0.885779	5.17703e-08	hypothetical protein
												AAP16676.1	cds1127	-0.886969	3.20115e-10	putative isomerase
												AAP16942.1	cds1393	-0.887015	6.82448e-08	putative aldolase
												AAP17209.1	fdnG	-0.887881	3.02691e-09	formate dehydrogenase-N%2C nitrate-inducible%2C alpha subunit
												AAP16097.1	ybgP	-0.888356	8.29935e-08	putative chaperone
												AAP16545.1	csgC	-0.888444	1.84613e-07	putative curli production protein
												NP_858316.1	cds4227	-0.889458	3.96985e-10	IS629 ORF1
												AAP16142.1	ybeS	-0.889904	1.82431e-09	putative enzyme
												AAP15850.1	cds301	-0.890177	1.94108e-09	integrase fragment
												AAP17358.1	fliE	-0.890825	6.71765e-07	flagellar hook-basal body 11K protein FliE
												AAP16390.1	cds842	-0.891831	3.07372e-06	hypothetical bacteriophage protein
												AAP19602.1	cds4052	-0.893429	3.57346e-10	2-deoxyribose-5-phosphate aldolase
												NP_858166.2	cds4084	-0.894052	3.30637e-10	transposase
												AAP19443.1	cds3893	-0.894403	1.15725e-05	IS1 orfB
												AAP16141.1	ybeT	-0.894864	2.66404e-07	hypothetical protein
												AAP15744.1	safA	-0.897871	1.60227e-09	putative cytoplasmic protein
												AAP19411.1	fimC	-0.898247	1.43201e-06	periplasmic chaperone
												AAP16165.1	crcA	-0.898742	6.19433e-10	hypothetical protein
												AAP17100.1	rstA	-0.900044	2.26003e-10	response transcriptional regulatory protein (RstB sensor)
												AAP17769.1	cds2221	-0.900997	2.07292e-10	putative PTS system enzyme IIA component%2C enzyme I
												AAP16623.1	ycfS	-0.903631	8.69713e-10	hypothetical protein
												AAP16626.1	ycfT	-0.903876	1.85156e-07	hypothetical protein
												AAP16071.1	nadA	-0.904142	3.13103e-10	quinolinate synthetase%2C A protein
												AAP19466.1	ytfR	-0.904218	3.13661e-09	putative ATP-binding component of a transport system
												NP_858233.1	cds4148	-0.905529	6.41803e-10	hypothetical protein
												AAP17140.1	sodC	-0.907224	3.9284e-10	superoxide dismutase precursor (Cu-Zn)
												AAP17658.1	glpC	-0.907595	1.06792e-08	sn-glycerol-3-phosphate dehydrogenase (anaerobic)%2C K-small subunit
												AAP17831.1	yffB	-0.908023	2.25298e-10	hypothetical protein
												AAP17681.1	cds2133	-0.908547	3.7507e-05	IS1 orfA
												AAP16249.1	ybhM	-0.909824	1.1249e-08	hypothetical protein
												AAP17112.1	cds1563	-0.911621	7.29997e-07	IS1 orfA
												AAP18658.1	phnB	-0.918451	1.04889e-09	hypothetical protein
												NP_858232.1	cds4147	-0.918563	9.50955e-10	ISSfl1 ORF1
												AAP18128.1	fucP	-0.918657	2.31564e-07	fucose permease
												NP_858265.1	icsB	-0.919295	6.25222e-11	IcsB%2C invasion protein
												AAP17356.1	ybcL	-0.92018	2.39982e-10	hypothetical protein
												AAP17944.1	cds2396	-0.922156	6.55841e-10	hypothetical protein
												AAP16720.1	chaC	-0.92593	8.81439e-11	cation transport regulator
												AAP16977.1	celF	-0.928185	1.11539e-09	cryptic phospho-beta-glucosidase%3B cryptic
												AAP18011.1	ygaE	-0.928344	1.26154e-10	putative transcriptional regulator
												AAP18278.1	cds2730	-0.928618	6.07622e-06	hypothetical protein
												AAP17811.1	cds2263	-0.928925	2.00761e-08	hypothetical protein
												AAP18060.1	hycA	-0.928961	0.000260859	formate hydrogenlyase regulatory protein
												AAP18980.1	yidQ	-0.929168	7.82259e-11	hypothetical protein
												AAP16685.1	dadX	-0.931727	5.57265e-11	alanine racemase 2
												AAP18012.1	ygaU	-0.932988	1.66447e-10	hypothetical protein
												AAP17191.1	yddB	-0.935169	1.67436e-10	hypothetical protein
												NP_858262.1	ipgC	-0.937511	2.62819e-11	IpgC%2C cytoplasmic chaperone for IpaB and IpaC
												AAP17525.1	yehB	-0.937729	3.79179e-10	putative outer membrane protein
												AAP18017.1	ygaP	-0.937991	5.06132e-11	hypothetical protein
												AAP19454.1	mgtA	-0.938152	2.81664e-11	Mg2+ transport ATPase%2C P-type 1
												AAP17345.1	fliC	-0.941323	1.59411e-10	flagellin
												AAP18815.1	yihQ	-0.942634	1.43568e-09	putative glycosidase
												AAP19489.1	cds3939	-0.943935	1.4074e-10	IS600 orfB
												AAP17977.1	cds2429	-0.946844	2.0082e-10	hypothetical protein
												AAP17739.1	cds2191	-0.947109	6.37537e-07	putative fimbrial-like protein
												AAP17763.1	cds2215	-0.948445	1.65427e-10	hypothetical protein
												AAP16814.1	ycjU	-0.95079	1.89323e-05	putative beta-phosphoglucomutase
												AAP17026.1	rem	-0.952536	5.38003e-09	hypothetical protein
												AAP19407.1	fimG	-0.952901	1.53094e-08	minor fimbrial subunit%2C precursor polypeptide
												AAP18610.1	malM	-0.953054	1.10628e-09	periplasmic protein of mal regulon
												AAP17109.1	uidA	-0.954468	3.19126e-09	beta-D-glucuronidase
												AAP17381.1	cds1830	-0.954607	1.06157e-10	IS2 orfA
												AAP18448.1	yhaU	-0.957283	1.09232e-05	putative transport protein
												AAP17397.1	cds1846	-0.958187	7.67333e-10	hypothetical bacteriophage protein
												AAP17821.1	cds2273	-0.958612	3.3747e-11	IS1N orfA
												AAP16858.1	cds1309	-0.961096	3.12699e-06	putative phosphatidate cytidiltransferase
												AAP16737.1	cds1188	-0.961731	4.50651e-09	IS4 orf
												AAP18219.1	cds2671	-0.96422	2.7164e-05	hypothetical lipoprotein
												AAP18051.1	ygbD	-0.964321	2.51671e-09	putative oxidoreductase
												AAP17825.1	talA	-0.964838	4.13837e-11	transaldolase A
												AAP16409.1	cds861	-0.965152	0.000759667	IS600 orfA
												AAP18217.1	cds2669	-0.966218	3.71498e-05	putative DNA-binding protein
												AAP17278.1	cds1727	-0.966624	7.7904e-11	hypothetical phage protein
												NP_858258.1	ipaA	-0.967577	6.11422e-12	hypothetical protein
												AAP17142.1	cds1593	-0.968307	9.82228e-10	hypothetical protein
												AAP19134.1	yiaH	-0.970466	4.37603e-11	hypothetical protein
												AAP17213.1	cds1662	-0.970803	1.17072e-05	IS1 orfA
												NP_858372.1	cds4281	-0.970883	1.71864e-11	IS630 orf
												AAP17774.1	cds2226	-0.970977	1.80955e-11	hypothetical protein
												NP_858220.1	cds4134	-0.971168	1.63413e-11	IS629 ORF2
												AAP16918.1	cds1369	-0.971654	6.99127e-12	putative outer membrane protein
												AAP15825.1	dinP	-0.972089	9.38081e-12	damage-inducible protein P
												AAP15774.1	cds226	-0.976054	2.77678e-07	putative DNA transfer protein
												AAP19141.1	yhiX	-0.977006	1.4862e-11	putative ARAC-type regulatory protein
												AAP15828.1	yafP	-0.98013	2.45333e-10	hypothetical protein
												AAP16373.1	cds825	-0.980859	3.17737e-12	host cell-killing modulation protein
												AAP18657.1	phnC	-0.981673	3.93686e-11	ATP-binding component of phosphonate transporter
												AAP17517.1	gatY	-0.982822	1.7261e-08	tagatose-bisphosphate aldolase 1
												AAP16143.1	ybeR	-0.983297	7.38053e-09	hypothetical protein
												AAP16250.1	ybhN	-0.984019	6.87418e-10	hypothetical protein
												AAP16664.1	cds1115	-0.984578	2.94977e-11	hypothetical protein
												AAP15617.1	leuO	-0.990292	2.10168e-10	probable transcriptional activator for leuABCD operon
												AAP16031.1	ybdB	-0.990626	4.60641e-10	hypothetical protein
												AAP15604.1	araB	-0.991073	2.85348e-10	L-ribulokinase
												AAP16932.1	cds1383	-0.99366	0.000332262	IS600 orfB
												AAP18442.1	tdcB	-0.994766	3.06555e-07	threonine dehydratase
												NP_858137.1	phoN2	-0.995456	1.91243e-12	PhoN2 (Apy)%2C periplasmic phosphatase%2C apyrase%2C ATP diphosphohydrolase
												NP_858190.1	cds4103	-0.997175	3.40872e-12	IS600 ORF2
												AAP17939.1	cds2391	-0.999002	3.07152e-10	hypothetical bacteriophage protein
												AAP17306.1	cds1755	-0.9994	6.08334e-07	IS629 orfA
												AAP17205.1	adhP	-0.999473	3.79754e-12	alcohol dehydrogenase
												NP_858221.1	cds4135	-1.00012	2.39536e-11	IS629 ORF1
												NP_858329.1	yccB	-1.00424	8.62167e-12	hypothetical protein
												NP_858397.1	cds4303	-1.00468	4.53545e-12	transposase
												AAP19194.1	arsR	-1.00704	6.80025e-09	transcriptional repressor of chromosomal ars operon
												AAP17190.1	cds1639	-1.00728	4.09657e-10	putative enzyme
												AAP18706.1	thiC	-1.00805	8.23684e-13	thiamine biosynthesis protein%2C pyrimidine moiety
												AAP18155.1	cds2607	-1.00882	1.30053e-12	hypothetical protein
												AAP18221.1	cds2673	-1.00951	1.55938e-08	putative ATP-binding protein of ABC transport system
												AAP19211.1	cds3662	-1.01007	3.59302e-05	possible chaperone
												AAP18338.1	yghA	-1.01222	1.38955e-11	putative oxidoreductase
												AAP17108.1	uidC	-1.01477	4.80856e-12	membrane-associated protein
												AAP17516.1	gatZ	-1.01929	8.65671e-10	putative tagatose 6-phosphate kinase 1
												AAP17814.1	cds2266	-1.02086	9.30117e-08	hypothetical protein
												AAP18407.1	ygjM	-1.02165	1.98211e-12	hypothetical protein
												NP_858355.1	cds4266	-1.02292	2.29745e-11	hypothetical protein
												AAP15872.1	phoB	-1.02312	6.26369e-13	positive response regulator for pho regulon
												AAP19110.1	yibI	-1.02385	6.05948e-05	hypothetical protein
												AAP18020.1	ygaC	-1.02623	4.9372e-13	hypothetical protein
												AAP19037.1	cds3488	-1.02718	0.000101514	IS1 orfA
												AAP19131.1	xylB	-1.02956	3.42277e-11	xylulokinase
												AAP17355.1	cds1804	-1.02962	2.4786e-12	putative regulator
												AAP17369.1	rcsA	-1.02998	4.79203e-13	positive regulator for ctr capsule biosynthesis%2C positive transcription factor
												AAP19618.1	cds4068	-1.03147	3.82762e-11	catabolite repression sensor kinase for PhoB%2C alternative sensor for pho regulon
												AAP16972.1	osmE	-1.03276	2.64834e-13	activator of ntrL gene
												NP_858213.1	cds4127	-1.03446	9.45173e-06	IS629 ORF1
												AAP16517.1	yccJ	-1.03574	1.4151e-12	hypothetical protein
												AAP17302.1	cutC	-1.0393	2.38118e-13	copper homeostasis protein
												AAP15824.1	mbhA	-1.03978	6.78188e-08	putative motility protein
												AAP19223.1	cds3674	-1.04109	1.94965e-13	hypothetical protein
												AAP16507.1	yccM	-1.04355	5.69516e-13	hypothetical protein
												AAP17900.1	cds2352	-1.04782	1.15197e-13	hypothetical protein
												AAP18290.1	cds2742	-1.04976	1.31335e-13	hypothetical protein
												NP_858222.1	cds4136	-1.05072	1.50336e-09	transposase/IS protein
												AAP16857.1	cds1308	-1.05336	1.1143e-09	probable enzyme
												AAP15827.1	yafO	-1.05541	1.44095e-12	hypothetical protein
												AAP15816.1	ykfE	-1.05871	6.05439e-14	hypothetical protein
												AAP19212.1	cds3663	-1.05943	1.44499e-08	probable fimbrial protein remnant
												AAP16363.1	cds814	-1.06036	1.84799e-07	ISSfl3 orfA
												AAP17764.1	cds2216	-1.06665	2.32607e-13	hypothetical protein
												AAP16854.1	cds1305	-1.06847	3.65403e-13	IS1 orfB
												AAP16739.1	ychE	-1.0693	2.16473e-13	putative channel protein
												AAP19130.1	xylF	-1.07019	5.69512e-11	xylose binding protein
												AAP16424.1	himD	-1.07265	3.36961e-14	integration host factor (IHF)%2C beta subunit
												AAP17515.1	gatA	-1.07623	4.00324e-06	galactitol-specific enzyme IIA of phosphotransferase system
												AAP18013.1	cds2465	-1.07638	1.19152e-10	hypothetical protein
												AAP18218.1	cds2670	-1.07701	3.18643e-09	putative inner membrane protein
												AAP17377.1	cds1826	-1.07826	8.89408e-11	ISEhe3 orfB
												AAP18130.1	fucU	-1.07844	6.1934e-14	protein of fucose operon
												NP_858370.1	virK	-1.07961	2.05776e-14	hypothetical protein
												AAP16268.1	ybiM	-1.0818	1.62857e-11	hypothetical protein
												NP_858260.2	ipaC	-1.0836	1.52658e-14	IpaC%2C secreted by the Mxi-Spa secretion machinery%2C required for entry into epithelial cells
												AAP18801.1	cds3252	-1.0839	9.97106e-10	hypothetical protein
												NP_858356.1	cds4267	-1.08504	5.35583e-14	ISSfl4 ORF3
												AAP17766.1	cds2218	-1.08513	1.71703e-14	putative aminotransferase
												NP_858333.2	cds4244	-1.08685	2.64314e-07	hypothetical protein
												AAP17172.1	ynhG	-1.08752	1.79592e-14	hypothetical protein
												AAP15686.1	fhuA	-1.08806	1.29699e-14	outer membrane protein receptor for ferrichrome%2C colicin M%2C and phages T1%2C T5%2C and phi80
												AAP18299.1	cds2751	-1.08965	1.32491e-13	hypothetical protein
												AAP18391.1	ttdB	-1.09314	7.37545e-09	L-tartrate dehydratase%2C subunit B
												AAP16815.1	ycjV	-1.09356	1.10126e-06	putative ATP-binding component of a transport system
												AAP16359.1	dmsB	-1.09402	2.9231e-11	anaerobic dimethyl sulfoxide reductase subunit B
												AAP16620.1	ycfJ	-1.09641	9.01241e-15	hypothetical protein
												AAP18523.1	yhbH	-1.09796	7.88991e-15	probable sigma-54 modulation protein
												AAP19107.1	mtlR	-1.09913	1.48688e-14	repressor for mtl
												NP_858259.1	ipaD	-1.1017	5.76219e-15	hypothetical protein
												AAP16043.1	ybdR	-1.10299	3.3753e-14	putative oxidoreductase
												AAP16719.1	chaB	-1.10315	4.35201e-12	cation transport regulator
												AAP16740.1	cds1191	-1.1041	2.66893e-09	IS1 orfB
												AAP19045.1	cds3496	-1.10604	1.39159e-11	IS3 orfA
												AAP18171.1	cds2623	-1.10734	1.59553e-11	hypothetical protein
												AAP17678.1	elaB	-1.10819	1.15864e-14	hypothetical protein
												AAP16645.1	cds1096	-1.10963	1.53975e-13	hypothetical bacteriophage protein
												AAP17486.1	cds1935	-1.11312	9.11362e-06	IS1 orfA
												AAP18015.1	cds2467	-1.11314	4.75198e-11	IS2 orfA
												AAP17544.1	cds1997	-1.11408	4.11791e-07	hypothetical bacteriophage protein
												AAP16368.1	cds820	-1.11624	4.12642e-10	putative bacteriophage protein
												NP_858230.2	cds4144	-1.11912	2.49709e-14	hypothetical protein
												AAP19417.1	yjhA	-1.12082	1.15519e-11	hypothetical protein
												AAP17562.1	yohC	-1.12386	2.52395e-13	hypothetical protein
												AAP18172.1	cds2624	-1.1247	8.38849e-12	hypothetical protein
												AAP19402.1	uxuR	-1.12504	5.70062e-14	regulator for uxu operon
												AAP16376.1	cds828	-1.12553	3.55559e-13	putative bacteriophage protein
												AAP16809.1	ycjO	-1.12661	1.43714e-06	putative binding-protein dependent transport protein
												AAP18617.1	yjbJ	-1.12707	1.04058e-14	hypothetical protein
												AAP17584.1	yeiL	-1.12749	4.44906e-11	putative transcriptional regulator
												AAP18215.1	pgk	-1.13725	8.38846e-16	phosphoglycerate kinase
												AAP17382.1	cds1831	-1.13872	4.29555e-12	putative outer membrane protein
												AAP17901.1	yfhO	-1.14196	6.26178e-16	putative aminotransferase
												NP_858292.1	cds4205	-1.14507	7.54662e-15	IS600 ORF2
												AAP18746.1	frwC	-1.14617	7.4029e-10	PTS system%2C fructose-like enzyme II component
												AAP16518.1	wrbA	-1.14673	2.80178e-15	trp repressor binding protein
												NP_858352.1	cds4263	-1.15465	6.22725e-16	hypothetical protein
												AAP16236.1	bioA	-1.15718	4.04973e-16	7%2C8-diaminopelargonic acid synthetase
												NP_858358.3	ccdB	-1.15842	1.20793e-15	plasmid maintenance protein CcdB
												AAP19418.1	yjhT	-1.16071	2.20833e-15	hypothetical protein
												AAP17955.1	rseA	-1.1618	1.9976e-16	sigma-E factor regulatory protein RseA
												AAP16897.1	cds1348	-1.16383	2.65718e-16	hypothetical protein
												AAP17076.1	cds1527	-1.16403	1.7205e-11	hypothetical protein
												NP_858291.1	cds4204	-1.16491	4.88291e-14	IS600 ORF1
												AAP16968.1	spy	-1.17066	1.72396e-16	periplasmic protein
												AAP17878.1	cds2330	-1.17905	1.2909e-16	hypothetical bacteriophage protein
												AAP17006.1	ydiE	-1.18133	1.62075e-16	hypothetical protein
												AAP19182.1	treF	-1.18744	5.70741e-16	cytoplasmic trehalase
												AAP19359.1	bfr	-1.18791	5.08746e-17	bacterioferrin
												AAP17982.1	aroF	-1.18887	4.28115e-17	3-deoxy-D-arabinoheptulosonate-7-phosphate synthase (DAHP synthetase%2C tyrosine repressible)
												NP_858399.2	cds4306	-1.18951	3.79946e-16	hypothetical protein
												AAP17794.1	yfeK	-1.19037	2.81019e-16	hypothetical protein
												AAP16524.1	cds976	-1.19047	1.65459e-10	hypothetical protein
												AAP17877.1	cds2329	-1.19137	4.61995e-17	putative DNA helicase
												NP_858263.1	ipgB1	-1.19137	3.58685e-17	protein IpgB1
												AAP15826.1	yafN	-1.19174	1.03226e-15	hypothetical protein
												AAP18402.1	ebgC	-1.19288	2.06157e-08	evolved beta-D-galactosidase%2C beta subunit
												NP_858330.2	cds4241	-1.19378	1.83508e-12	hypothetical protein
												AAP16542.1	csgB	-1.19408	1.02558e-07	minor curlin subunit precursor
												NP_858369.1	rfbU	-1.19547	2.80924e-17	UDP-sugar hydrolase
												NP_858393.2	repA	-1.19821	2.59748e-17	replication protein
												AAP18019.1	cds2471	-1.20213	6.42034e-17	hypothetical protein
												AAP17029.1	relB	-1.20793	3.67966e-17	negative regulator of translation
												AAP16030.1	entA	-1.20916	2.59344e-15	2%2C3-dihydro-2%2C3-dihydroxybenzoate dehydrogenase
												AAP17078.1	cds1529	-1.21101	6.46125e-17	hypothetical protein
												NP_858228.1	cds4143	-1.21312	1.26604e-16	ISSfl4 ORF3
												AAP18220.1	cds2672	-1.21314	6.51026e-09	hypothetical lipoprotein
												AAP18284.1	cds2736	-1.21565	7.9096e-11	hypothetical protein
												AAP18983.1	dgoT	-1.21737	5.38025e-15	D-galactonate transport protein
[truncated: 208 more rows]

## Sheet: List of genes between α and β 
Common between α and β							Specific for α				Specific for β
		Comparison α		Comparison β
Total Genes	77							215				101
Gene ID	GeneName	Log2 Fold change	P-value	Log2 Fold change	P-value		Gene ID	Gene Name	Log2 Fold change		Gene ID	Gene Name	Log2 Fold change
AAP17390.1	cds1839	6.40215	1.2959e-110	-1.26108	9.16871e-08		AAP17248.1	yebL	3.37353		AAP18285.1	cds2737	1.31117
AAP17152.1	sodB	1.79492	1.50156e-14	-0.922134	4.70538e-05		AAP17666.1	cds2118	2.6708		AAP18217.1	cds2669	1.13306
AAP16502.1	cspH	1.71714	2.80635e-13	-1.44	1.83074e-09		AAP17665.1	cds2117	2.4287		AAP17185.1	cds1634	1.09265
AAP18856.1	metE	1.53599	3.28535e-11	-2.41044	1.78019e-24		AAP17249.1	yebM	2.26968		AAP18060.1	hycA	1.07504
AAP18910.1	ppiC	1.47184	2.07663e-10	-1.70506	1.92227e-13		AAP17667.1	ybfG	2.17478		AAP17747.1	cds2199	1.07391
AAP18911.1	ilvC	1.358	3.81638e-09	-1.70707	1.282e-13		AAP17250.1	yebI	2.07385		AAP19562.1	cds4012	1.0676
AAP16320.1	artM	1.25722	4.91785e-08	-1.39503	1.34916e-09		AAP17664.1	ais	2.04875		AAP15991.1	sfmA	1.06424
AAP19160.1	dppC	1.18241	2.67032e-07	-1.15375	4.11744e-07		AAP17247.1	yebA	2.03242		AAP16815.1	ycjV	1.05832
AAP17795.1	cysM	1.16601	3.82117e-07	-1.22901	7.03935e-08		AAP18665.1	yjdB	1.79165		AAP15857.1	cds308	1.0394
AAP16504.1	cds956	1.16148	1.2293e-06	-1.42173	2.93673e-08		AAP15928.1	glnK	1.57459		AAP19110.1	yibI	0.941668
AAP18093.1	cysI	1.15514	4.80861e-07	-1.44288	2.93388e-10		AAP16505.1	cspG	1.53184		AAP19015.1	yieC	0.935788
AAP17686.1	nuoK	1.14326	6.81339e-07	-1.16411	3.85768e-07		AAP17332.1	ftn	1.44739		AAP17794.1	yfeK	0.883467
AAP17689.1	nuoH	1.0942	1.82207e-06	-1.21053	1.08526e-07		AAP19531.1	yjeT	1.29		AAP17301.1	yecK	0.881478
AAP17688.1	nuoI	1.09174	1.96617e-06	-1.2532	4.25668e-08		AAP18909.1	rep	1.13224		AAP16252.1	ybhP	0.879805
AAP18094.1	cysJ	1.08777	2.07084e-06	-1.02914	5.68345e-06		AAP17904.1	suhB	1.10812		AAP16576.1	dinI	0.874036
AAP18092.1	cysH	1.07261	2.88833e-06	-1.19613	1.54858e-07		AAP19146.1	cds3597	1.04603		AAP16326.1	cds777	0.867772
AAP19159.1	dppB	1.06254	3.51705e-06	-1.28561	1.76151e-08		AAP15832.1	gpt	1.01361		AAP17368.1	fliR	0.866461
AAP17687.1	nuoJ	1.05203	4.47386e-06	-1.16593	3.21612e-07		AAP18377.1	cds2829	0.986009		AAP17377.1	cds1826	0.866092
AAP17684.1	nuoM	1.03659	6.17841e-06	-1.26089	3.64097e-08		AAP17797.1	cysW	0.982956		AAP15992.1	sfmC	0.860375
AAP18735.1	argH	1.02419	7.75953e-06	-1.377	1.83022e-09		AAP16103.1	ybgH	0.979881		NP_858330.2	cds4241	0.845335
AAP15577.1	carB	1.02051	8.1825e-06	-1.32915	5.68227e-09		AAP18753.1	rpmE	0.971363		AAP18443.1	tdcA	0.84018
AAP16321.1	artQ	1.01978	8.82918e-06	-1.62657	2.31482e-12		AAP16259.1	rhlE	0.969516		AAP18719.1	tufB	-0.83147
AAP17685.1	nuoL	1.01283	9.6342e-06	-1.13837	5.55846e-07		AAP17761.1	cds2213	0.964735		AAP18898.1	rffH	-0.832127
AAP18736.1	argB	1.01245	1.02398e-05	-1.83773	3.67029e-15		AAP17760.1	cds2212	0.963089		AAP18944.1	atpG	-0.836398
AAP19161.1	dppD	1.01162	9.90135e-06	-1.13426	6.15016e-07		AAP18740.1	yijP	0.963003		AAP19262.1	gntK	-0.837522
AAP19162.1	dppF	0.971914	2.1484e-05	-1.07756	2.11294e-06		AAP17668.1	cds2120	0.955327		AAP17806.1	cds2258	-0.83959
AAP16322.1	artI	0.963997	2.57303e-05	-1.55785	1.53212e-11		AAP18994.1	rnpA	0.942793		AAP19071.1	mutM	-0.844189
AAP17009.1	ppsA	0.963891	2.46606e-05	-1.07851	1.97787e-06		AAP18088.1	cysC	0.917052		AAP15729.1	rcsF	-0.851619
AAP17720.1	cvpA	0.963864	2.55089e-05	-0.875093	0.000115733		AAP16417.1	ycaO	0.897596		AAP18750.1	metB	-0.852014
AAP17690.1	nuoG	0.95396	2.98312e-05	-1.02721	5.81038e-06		AAP17627.1	napD	0.877292		AAP17734.1	yfcA	-0.852531
AAP17714.1	hisM	0.952767	3.24218e-05	-1.46861	2.05822e-10		AAP16294.1	yliG	0.868848		AAP18692.1	metA	-0.852593
AAP16744.1	oppC	0.952571	3.13629e-05	-1.22133	8.803e-08		AAP15877.1	queA	0.859111		AAP17378.1	cds1827	-0.859139
AAP17683.1	nuoN	0.946366	3.49276e-05	-1.03602	5.04749e-06		AAP17153.1	cds1602	0.857977		AAP19299.1	yrfH	-0.861755
AAP17713.1	hisP	0.942456	3.9596e-05	-1.56095	1.69946e-11		AAP18350.1	cds2802	0.851938		AAP16765.1	trpE	-0.882486
AAP17798.1	cysU	0.932632	4.51724e-05	-0.838303	0.000211644		AAP15881.1	secF	0.840234		AAP16203.1	cds654	-0.886943
AAP18737.1	argC	0.91767	6.1945e-05	-1.33335	6.98765e-09		AAP19568.1	yjiY	0.839957		AAP15847.1	gtrII	-0.892246
AAP17691.1	nuoF	0.915207	6.20797e-05	-0.882986	9.61401e-05		AAP17852.1	uraA	0.836913		AAP18916.1	ilvM	-0.893786
AAP16982.1	cds1433	0.910996	0.000123004	-1.33177	6.91565e-08		AAP18993.1	rpmH	0.833796		AAP15855.1	cds306	-0.89475
AAP17692.1	nuoE	0.870557	0.000138581	-1.05787	3.27246e-06		AAP19554.1	rpsF	0.8331		AAP17424.1	cobS	-0.898113
AAP17105.1	fumA	0.855827	0.000178313	-1.23036	6.93364e-08		AAP19556.1	rpsR	0.827397		AAP16063.1	galT	-0.899627
AAP18562.1	mreD	0.851414	0.000204536	-0.932605	4.5478e-05		AAP17446.1	cds1895	0.826428		AAP18966.1	ilvB	-0.900561
AAP18493.1	argG	0.850227	0.000195888	-1.50087	6.38292e-11		AAP15664.1	yacK	0.823282		AAP15549.1	thrA	-0.916774
AAP16714.1	hemK	0.846386	0.000224042	-1.06438	3.55078e-06		AAP19555.1	priB	0.820622		AAP18915.1	ilvE	-0.917028
AAP19441.1	argI	0.845629	0.000216069	-1.63994	1.38979e-12		AAP18089.1	cysN	0.818238		AAP19083.1	waaI	-0.918049
AAP16934.1	yeaF	0.841022	0.000227859	-1.2093	1.09121e-07		AAP19303.1	mrcA	0.817219		AAP18027.1	proX	-0.918338
AAP15573.1	lytB	0.82947	0.000284167	-1.07842	2.25626e-06		AAP15567.1	rpsT	0.817122		AAP18946.1	atpC	-0.919192
AAP15572.1	slpA	0.828361	0.000294914	-0.880082	0.000112221		AAP18546.1	rplM	0.806347		AAP16084.1	farR	-0.920444
AAP18945.1	atpD	0.815602	0.000346064	-1.35442	2.9393e-09		AAP15951.1	adk	0.805039		AAP17428.1	is629b	-0.928364
AAP17693.1	nuoC	0.807952	0.000393734	-0.991688	1.19353e-05		AAP17608.1	rplY	0.802444		AAP19380.1	rplO	-0.929889
AAP19249.1	livM	0.802146	0.000437262	-1.08805	1.69124e-06		NP_858211.1	ipaH7	-0.801365		AAP16091.1	sdhA	-0.934192
AAP18621.1	yjbO	-0.820264	0.000392275	1.36628	2.78658e-09		AAP18733.1	cds3184	-0.80227		AAP18757.1	hslV	-0.944957
AAP16393.1	ybhH	-0.83805	0.00326938	1.17708	5.93532e-06		NP_858273.1	mxiK	-0.806783		AAP16746.1	oppF	-0.951622
AAP16665.1	cds1116	-0.84181	0.000269924	0.841232	0.000218933		AAP18399.1	ygjG	-0.807325		AAP15630.1	mraY	-0.95231
AAP16707.1	ychH	-0.857057	0.000207111	1.03679	5.51823e-06		AAP15784.1	cds236	-0.80918		AAP17351.1	yedE	-0.953851
AAP17570.1	cds2023	-0.858189	0.000249816	1.21947	1.23158e-07		NP_858221.1	cds4135	-0.810028		AAP16764.1	trpD	-0.95395
AAP18408.1	ygjN	-0.931746	6.73333e-05	1.12226	1.03947e-06		AAP16673.1	cds1124	-0.811223		AAP15550.1	thrB	-0.955856
NP_858136.1	ospB	-0.93399	4.60205e-05	1.00727	8.96516e-06		AAP16902.1	cds1353	-0.811249		AAP15804.1	ykgF	-0.956333
NP_858359.2	ipaH9	-0.981393	1.83118e-05	0.938244	3.39433e-05		AAP18706.1	thiC	-0.811783		AAP15622.1	cds74	-0.959659
AAP17874.1	trbJ	-0.997496	1.35047e-05	0.907228	6.0872e-05		AAP17983.1	yfiL	-0.813109		AAP16323.1	artP	-0.959937
AAP17873.1	trbL	-1.01342	1.1198e-05	0.9281	4.39851e-05		AAP18339.1	cds2791	-0.813294		AAP16788.1	ycjD	-0.962573
AAP17813.1	cds2265	-1.02556	0.00016978	0.866355	0.000572682		NP_858222.1	cds4136	-0.813905		AAP18978.1	ibpB	-0.963625
AAP17812.1	cds2264	-1.03306	4.96351e-05	1.0113	2.82335e-05		NP_858264.1	ipgA	-0.814711		AAP19501.1	mopA	-0.967147
AAP16806.1	pspE	-1.03779	6.72775e-06	0.924009	4.68126e-05		NP_858275.1	mxiL	-0.815234		AAP18885.1	hemD	-0.970546
AAP16541.1	csgD	-1.06801	8.56095e-06	0.834909	0.000318315		NP_858271.1	mxiI	-0.816785		AAP16085.1	sucD	-0.984044
AAP17875.1	cds2327	-1.08595	2.28018e-06	0.989231	1.27499e-05		AAP15960.1	ybaQ	-0.819692		AAP16086.1	sucC	-0.985158
YP_001449237.1	ospE1	-1.11029	2.16051e-06	0.966523	2.45386e-05		AAP18340.1	exbD	-0.827729		AAP16937.1	gapA	-0.987769
AAP16805.1	pspD	-1.13143	1.07511e-06	1.14519	5.30505e-07		AAP18767.1	yiiS	-0.829661		AAP18914.1	ilvD	-0.990635
AAP16804.1	pspC	-1.2393	8.30261e-08	1.13809	5.75e-07		AAP16888.1	cds1339	-0.82985		AAP18758.1	hslU	-0.99943
AAP18814.1	yihR	-1.33588	2.34003e-07	0.831585	0.000563655		AAP16854.1	cds1305	-0.834201		AAP18141.1	argA	-1.00208
AAP17259.1	ipaH_4	-1.38495	4.61664e-09	1.22675	9.67265e-08		AAP17270.1	cds1719	-0.837478		AAP16762.1	trpB	-1.00504
AAP16622.1	ycfR	-1.42063	1.07262e-09	1.28029	2.14796e-08		AAP16407.1	cds859	-0.837845		AAP16763.1	trpC	-1.00849
YP_001449236.1	ospE2	-1.42432	2.28593e-09	1.18363	2.74738e-07		AAP18169.1	cds2621	-0.838463		AAP19500.1	mopB	-1.01246
AAP16803.1	pspB	-1.43457	6.87981e-10	1.08083	2.02167e-06		NP_858274.2	mxiN	-0.843004		AAP17715.1	hisQ	-1.01379
AAP17258.1	cds1707	-1.44606	8.15919e-10	0.980018	1.80441e-05		NP_858261.1	ipaB	-0.843356		AAP18979.1	ibpA	-1.01434
AAP16802.1	pspA	-1.45007	3.64747e-10	0.979684	1.50882e-05		NP_858265.1	icsB	-0.844715		AAP16226.1	cds677	-1.03354
NP_858183.2	cds4097	-1.46914	4.22108e-10	1.10033	1.5115e-06		AAP17206.1	yddM	-0.846053		AAP17352.1	yedF	-1.03614
AAP16068.1	cds519	-1.51813	9.75093e-11	0.998893	1.1744e-05		AAP15996.1	ybcH	-0.847298		AAP16090.1	sdhB	-1.04907
							AAP17326.1	otsB	-0.848244		AAP17241.1	eda	-1.05856
							AAP17271.1	cds1720	-0.848503		AAP16743.1	oppB	-1.06082
							AAP17902.1	cds2354	-0.852376		AAP15551.1	thrC	-1.07901
							AAP18215.1	pgk	-0.863595		AAP19172.1	dctA	-1.07963
							NP_858351.1	cds4262	-0.865449		AAP19576.1	hpaD	-1.08018
							AAP17969.1	kgtP	-0.866179		AAP19298.1	yrfI	-1.08712
							AAP17774.1	cds2226	-0.867308		AAP17572.1	mglA	-1.09841
							NP_858259.1	ipaD	-0.870338		AAP18479.1	yhbT	-1.11285
							NP_858270.1	mxiH	-0.875334		AAP17094.1	pntB	-1.12789
							NP_858267.1	ipgE	-0.878048		AAP18585.1	aroE	-1.13032
							AAP17112.1	cds1563	-0.879244		AAP16745.1	oppD	-1.16686
							AAP16737.1	cds1188	-0.881128		AAP16662.1	cds1113	-1.17642
							NP_858262.1	ipgC	-0.881332		AAP18087.1	ygbE	-1.18932
							AAP19291.1	feoA	-0.882212		NP_858194.1	cds4108	-1.19904
							NP_858352.1	cds4263	-0.882721		AAP19337.1	argD	-1.23089
							AAP18811.1	yihU	-0.885344		AAP16903.1	cds1354	-1.24125
							AAP16621.1	ycfQ	-0.888401		AAP15803.1	ykgG	-1.24626
							AAP18277.1	cds2729	-0.889716		AAP19578.1	hpaG	-1.2981
							AAP17050.1	cds1501	-0.890507		AAP18748.1	metF	-1.40046
							AAP18257.1	cds2709	-0.89476		AAP19577.1	hpaE	-1.41418
							AAP17872.1	cds2324	-0.89801		AAP19147.1	cspA	-1.41448
							NP_858263.1	ipgB1	-0.908175		AAP16319.1	artJ	-1.44837
							AAP18050.1	cds2502	-0.910536		AAP16503.1	cds955	-1.45629
							NP_858258.1	ipaA	-0.910993		AAP16138.1	ybeK	-1.64409
							NP_858378.1	mvpA	-0.914702
							NP_858368.1	shf	-0.915039
							NP_858242.1	cds4155	-0.918187
							NP_858260.2	ipaC	-0.921634
							AAP17583.1	yeiK	-0.924413
							AAP17068.1	cds1519	-0.929558
							AAP16539.1	csgF	-0.932715
							AAP18160.1	lysA	-0.933778
							NP_858350.1	cds4261	-0.937943
							AAP16645.1	cds1096	-0.938775
							AAP17213.1	cds1662	-0.947901
							AAP16273.1	dps	-0.948949
							AAP16363.1	cds814	-0.948953
							NP_858192.1	cds4105	-0.95295
							AAP17454.1	hisA	-0.962676
							AAP16540.1	csgE	-0.986047
							AAP16332.1	poxB	-0.988715
							AAP16535.1	ycdU	-0.99092
							AAP17449.1	hisG	-0.992939
							AAP15772.1	cds224	-0.998267
							AAP18766.1	yiiT	-1.00306
							AAP15931.1	ybaY	-1.00424
							AAP17040.1	ydeI	-1.00986
							AAP16678.1	umuD	-1.01196
							NP_858243.2	cds4156	-1.01271
							AAP18635.1	soxR	-1.01416
							AAP17584.1	yeiL	-1.01696
							AAP16759.1	yciF	-1.01949
							NP_858357.1	ccdA	-1.02055
							AAP17392.1	ipaH_5	-1.02225
							AAP17455.1	hisF	-1.02338
							AAP18168.1	cds2620	-1.02796
							AAP17006.1	ydiE	-1.03606
							AAP18604.1	xylE	-1.03819
							AAP16361.1	ycaC	-1.03832
							AAP16640.1	cds1091	-1.03849
							AAP17775.1	cds2227	-1.03902
							NP_858191.1	cds4104	-1.04193
							AAP18603.1	yjbA	-1.05866
							AAP16533.1	cds985	-1.06107
							AAP17776.1	cds2228	-1.06834
							AAP18746.1	frwC	-1.07997
							NP_858294.1	cds4207	-1.08494
							NP_858193.2	cds4106	-1.09546
							AAP17456.1	hisI	-1.09603
							AAP16758.1	yciE	-1.11333
							AAP16467.1	rmf	-1.11891
							AAP17172.1	ynhG	-1.13262
							AAP16519.1	ycdF	-1.14116
							AAP19597.1	osmY	-1.15944
							AAP17453.1	hisH	-1.1772
							AAP16579.1	grxB	-1.18463
							AAP17978.1	yfiA	-1.19545
							AAP18527.1	yrbL	-1.20054
							AAP17588.1	fruA	-1.21564
							AAP18974.1	yidL	-1.21714
							AAP17201.1	osmC	-1.22525
							AAP16028.1	entE	-1.23116
							AAP16295.1	cds746	-1.24865
							AAP17452.1	hisB	-1.2627
							AAP16110.1	ybfA	-1.29067
							AAP17543.1	cds1996	-1.29246
							AAP17450.1	hisD	-1.33396
							AAP16267.1	cds718	-1.34672
							AAP15686.1	fhuA	-1.35314
							AAP18802.1	cds3253	-1.37599
							AAP17544.1	cds1997	-1.37862
							AAP17041.1	cds1492	-1.38386
							AAP17981.1	tyrA	-1.38905
							AAP19564.1	cds4014	-1.446
							AAP19029.1	cds3480	-1.47604
							AAP19359.1	bfr	-1.48181
							NP_858182.2	insA	-1.48522
							AAP17982.1	aroF	-1.52188
							AAP17451.1	hisC	-1.55414
							AAP19035.1	imm	-1.55447
							AAP17278.1	cds1727	-1.65361
							AAP19358.1	yheA	-1.70331
							AAP19036.1	shiE	-1.78056
							AAP17777.1	mntH	-1.78257
							AAP18216.1	epd	-1.78963
							AAP17589.1	fruK	-1.80711
							AAP17590.1	fruB	-1.85269
							AAP16738.1	adhE	-1.88513
							AAP19590.1	bglJ	-1.98584
							AAP17177.1	ynhE	-1.99697
							AAP16027.1	fepB	-2.05038
							AAP19591.1	fhuF	-2.05702
							AAP17276.1	sitC	-2.08496
							AAP17178.1	ydiC	-2.09176
							AAP16024.1	fepG	-2.1169
							AAP18024.1	nrdF	-2.13069
							AAP18023.1	nrdE	-2.14417
							AAP16023.1	fepC	-2.14656
							AAP17176.1	ynhD	-2.16988
							AAP18021.1	nrdH	-2.17121
							AAP17275.1	sitB	-2.17755
							AAP17175.1	ynhC	-2.18251
							AAP18022.1	nrdI	-2.20919
							AAP17277.1	sitD	-2.21538
							AAP17174.1	cds1623	-2.25554
							AAP16025.1	fepD	-2.27861
							AAP17274.1	sitA	-2.28452
							AAP16017.1	entD	-2.30892
							AAP17173.1	ynhA	-2.48252
							AAP16026.1	ybdA	-2.49837
							AAP19033.1	iucB	-2.53211
							AAP19034.1	iucA	-2.54913
							AAP19031.1	iucD	-2.62748
							AAP19032.1	iucC	-2.67218
							AAP19030.1	iutA	-2.88869
							AAP16020.1	entF	-4.12487
							AAP16018.1	fepA	-4.30242
							AAP16019.1	fes	-4.39676

## Sheet: List of genes between α and γ
Common between α and γ							Specific for α				Specific for γ
		Comparison α		Comparison γ
Total Genes	286							6				1919
GeneID	GeneName	Log2 Fold change	P-value	Log2 Fold change	P-value		Gene ID	Gene Name	Log2 Fold change		Gene ID	Gene Name	log2 Fold change
AAP17390.1	cds1839	6.40215	1.2959e-110	8.31857	0		AAP18377.1	cds2829	0.986009		AAP19442.1	cds3892	2.79495
AAP17248.1	yebL	3.37353	4.95271e-42	4.41197	2.92929e-166		AAP17668.1	cds2120	0.955327		AAP18748.1	metF	2.37029
AAP17666.1	cds2118	2.6708	4.24207e-28	2.23126	8.43541e-50		AAP17627.1	napD	0.877292		AAP16319.1	artJ	2.291
AAP17665.1	cds2117	2.4287	4.79894e-24	1.95484	3.6838e-40		NP_858275.1	mxiL	-0.815234		AAP16138.1	ybeK	2.10743
AAP17249.1	yebM	2.26968	1.19796e-21	3.2557	5.21623e-101		AAP17068.1	cds1519	-0.929558		AAP19337.1	argD	2.00558
AAP17667.1	ybfG	2.17478	1.00726e-19	1.53509	8.20452e-25		AAP18160.1	lysA	-0.933778		AAP19147.1	cspA	1.92288
AAP17250.1	yebI	2.07385	1.53146e-18	2.8343	1.80274e-79						AAP16503.1	cds955	1.88622
AAP17664.1	ais	2.04875	1.14455e-16	1.50252	1.71458e-20						AAP19577.1	hpaE	1.83373
AAP17247.1	yebA	2.03242	5.60627e-18	2.82253	1.16397e-79						AAP16745.1	oppD	1.80544
AAP17152.1	sodB	1.79492	1.50156e-14	2.25586	1.51407e-53						AAP18087.1	ygbE	1.80076
AAP18665.1	yjdB	1.79165	4.72082e-14	1.20268	9.75292e-16						AAP18141.1	argA	1.77025
AAP16502.1	cspH	1.71714	2.80635e-13	2.69454	1.05425e-63						AAP17351.1	yedE	1.71584
AAP15928.1	glnK	1.57459	1.69985e-09	1.2744	3.17551e-09						AAP19298.1	yrfI	1.704
AAP18856.1	metE	1.53599	3.28535e-11	4.06819	2.27478e-146						AAP16323.1	artP	1.66037
AAP16505.1	cspG	1.53184	9.53983e-11	1.61372	8.40767e-24						AAP15803.1	ykgG	1.64798
AAP18910.1	ppiC	1.47184	2.07663e-10	2.91749	5.14726e-83						AAP15551.1	thrC	1.64565
AAP17332.1	ftn	1.44739	4.41302e-10	1.16066	8.07703e-16						AAP16746.1	oppF	1.63985
AAP18911.1	ilvC	1.358	3.81638e-09	2.9712	5.06859e-87						AAP17715.1	hisQ	1.628
AAP19531.1	yjeT	1.29	1.27003e-06	1.23073	3.59999e-09						AAP16743.1	oppB	1.61686
AAP16320.1	artM	1.25722	4.91785e-08	2.55714	8.69895e-66						AAP18585.1	aroE	1.57072
AAP19160.1	dppC	1.18241	2.67032e-07	2.27824	2.68663e-54						AAP19578.1	hpaG	1.56706
AAP17795.1	cysM	1.16601	3.82117e-07	2.23607	1.17863e-52						AAP19500.1	mopB	1.56082
AAP16504.1	cds956	1.16148	1.2293e-06	2.05655	1.26329e-30						AAP17352.1	yedF	1.55807
AAP18093.1	cysI	1.15514	4.80861e-07	2.51661	4.29037e-65						AAP18946.1	atpC	1.55236
AAP17686.1	nuoK	1.14326	6.81339e-07	2.20466	2.79619e-50						AAP18719.1	tufB	1.52453
AAP18909.1	rep	1.13224	8.34992e-07	1.32197	2.63028e-20						AAP19576.1	hpaD	1.52077
AAP17904.1	suhB	1.10812	1.40494e-06	1.5792	6.30323e-28						AAP18758.1	hslU	1.51715
AAP17689.1	nuoH	1.0942	1.82207e-06	2.29438	3.8228e-55						AAP18914.1	ilvD	1.50668
AAP17688.1	nuoI	1.09174	1.96617e-06	2.27624	5.77976e-54						AAP15550.1	thrB	1.50321
AAP18094.1	cysJ	1.08777	2.07084e-06	2.08563	1.1345e-46						AAP19501.1	mopA	1.48949
AAP18092.1	cysH	1.07261	2.88833e-06	2.23953	1.03229e-52						AAP16634.1	potB	1.48577
AAP19159.1	dppB	1.06254	3.51705e-06	2.26449	6.27359e-54						AAP16315.1	potH	1.48272
AAP17687.1	nuoJ	1.05203	4.47386e-06	2.18606	2.78404e-50						AAP18979.1	ibpA	1.47478
AAP19146.1	cds3597	1.04603	2.06249e-05	0.789984	1.09457e-05						AAP18898.1	rffH	1.47262
AAP17684.1	nuoM	1.03659	6.17841e-06	2.1809	7.71434e-50						AAP18947.1	glmU	1.46593
AAP18735.1	argH	1.02419	7.75953e-06	2.27344	4.75737e-54						AAP18569.1	accC	1.45896
AAP15577.1	carB	1.02051	8.1825e-06	2.14712	3.07856e-49						AAP19172.1	dctA	1.45814
AAP16321.1	artQ	1.01978	8.82918e-06	2.61236	6.50645e-68						AAP18757.1	hslV	1.45617
AAP15832.1	gpt	1.01361	1.04436e-05	1.06661	1.09629e-13						AAP15727.1	proS	1.4496
AAP17685.1	nuoL	1.01283	9.6342e-06	2.12116	4.99228e-48						AAP18944.1	atpG	1.44584
AAP18736.1	argB	1.01245	1.02398e-05	2.76784	8.51045e-75						AAP19380.1	rplO	1.44479
AAP19161.1	dppD	1.01162	9.90135e-06	2.07137	5.62236e-46						AAP19609.1	sms	1.44049
AAP17797.1	cysW	0.982956	1.76926e-05	1.57694	5.17451e-28						AAP15630.1	mraY	1.43496
AAP16103.1	ybgH	0.979881	2.25364e-05	1.69838	7.21666e-30						AAP15576.1	carA	1.43449
AAP19162.1	dppF	0.971914	2.1484e-05	1.93445	1.17148e-40						AAP17094.1	pntB	1.42727
AAP18753.1	rpmE	0.971363	2.15547e-05	1.44149	4.80749e-24						AAP17572.1	mglA	1.42434
AAP16259.1	rhlE	0.969516	2.30628e-05	0.921405	7.90793e-11						AAP18749.1	metL	1.40123
AAP17761.1	cds2213	0.964735	2.92672e-05	1.62357	3.28256e-28						AAP18750.1	metB	1.39999
AAP16322.1	artI	0.963997	2.57303e-05	2.48575	1.35638e-62						AAP18568.1	accB	1.39886
AAP17009.1	ppsA	0.963891	2.46606e-05	1.88709	3.92937e-39						AAP19299.1	yrfH	1.39115
AAP17720.1	cvpA	0.963864	2.55089e-05	1.77951	1.05194e-34						AAP17799.1	cysP	1.38054
AAP17760.1	cds2212	0.963089	2.94445e-05	1.44796	4.51155e-23						AAP18891.1	yifK	1.37458
AAP18740.1	yijP	0.963003	2.5717e-05	1.55389	2.35216e-27						AAP15622.1	cds74	1.36291
AAP17690.1	nuoG	0.95396	2.98312e-05	1.95888	8.11144e-42						AAP16154.1	mrdB	1.35825
AAP17714.1	hisM	0.952767	3.24218e-05	2.07639	6.43511e-45						AAP15729.1	rcsF	1.35459
AAP16744.1	oppC	0.952571	3.13629e-05	2.05585	4.1962e-45						AAP15549.1	thrA	1.35283
AAP17683.1	nuoN	0.946366	3.49276e-05	1.99007	8.94784e-43						AAP17694.1	nuoB	1.34956
AAP18994.1	rnpA	0.942793	3.7317e-05	1.38017	3.55392e-22						AAP19071.1	mutM	1.34928
AAP17713.1	hisP	0.942456	3.9596e-05	2.2256	1.27755e-50						AAP19248.1	livH	1.34888
AAP17798.1	cysU	0.932632	4.51724e-05	1.68793	8.44225e-32						AAP18090.1	cysD	1.34878
AAP18737.1	argC	0.91767	6.1945e-05	2.16555	1.46313e-48						AAP17241.1	eda	1.34326
AAP18088.1	cysC	0.917052	6.13952e-05	1.66577	8.03188e-31						AAP17019.1	cds1470	1.34295
AAP17691.1	nuoF	0.915207	6.20797e-05	1.75088	5.42889e-34						AAP19202.1	yhiQ	1.34188
AAP16982.1	cds1433	0.910996	0.000123004	2.04893	5.29178e-34						AAP17719.1	purF	1.34075
AAP16417.1	ycaO	0.897596	8.6619e-05	1.54835	4.52063e-27						AAP19608.1	serB	1.33841
AAP17692.1	nuoE	0.870557	0.000138581	1.89962	3.15885e-39						AAP16917.1	yeaZ	1.33765
AAP16294.1	yliG	0.868848	0.000144359	1.21653	1.38778e-17						AAP15912.1	ampG	1.33682
AAP15877.1	queA	0.859111	0.000169711	1.16739	2.13876e-16						AAP16061.1	modF	1.3179
AAP17153.1	cds1602	0.857977	0.000194692	1.42538	4.14203e-22						AAP19056.1	spoT	1.31235
AAP17105.1	fumA	0.855827	0.000178313	1.88564	1.04193e-38						AAP15731.1	yaeE	1.31211
AAP18350.1	cds2802	0.851938	0.000199644	1.27338	8.97446e-19						AAP16788.1	ycjD	1.30665
AAP18562.1	mreD	0.851414	0.000204536	1.71232	1.14791e-31						AAP15950.1	htpG	1.30601
AAP18493.1	argG	0.850227	0.000195888	2.37196	2.50549e-58						AAP18913.1	ilvA	1.28927
AAP16714.1	hemK	0.846386	0.000224042	1.65386	1.63817e-29						AAP18915.1	ilvE	1.28319
AAP19441.1	argI	0.845629	0.000216069	2.50953	1.21934e-63						AAP16633.1	potC	1.28223
AAP16934.1	yeaF	0.841022	0.000227859	1.98484	1.15523e-42						AAP19357.1	tufA	1.28162
AAP15881.1	secF	0.840234	0.000234094	1.3492	3.53002e-21						AAP17123.1	ydgO	1.2801
AAP19568.1	yjiY	0.839957	0.000241101	0.964139	1.17405e-11						AAP18561.1	yhdE	1.27714
AAP17852.1	uraA	0.836913	0.000297662	1.34339	2.66235e-19						AAP16981.1	cds1432	1.27307
AAP18993.1	rpmH	0.833796	0.000259081	1.09786	9.08682e-15						AAP19055.1	spoU	1.27267
AAP19554.1	rpsF	0.8331	0.000258513	1.23181	3.28988e-18						AAP18648.1	gltP	1.2643
AAP15573.1	lytB	0.82947	0.000284167	1.65641	2.44088e-30						AAP19163.1	yhjV	1.26293
AAP15572.1	slpA	0.828361	0.000294914	1.43973	2.4194e-23						AAP17122.1	cds1573	1.26047
AAP19556.1	rpsR	0.827397	0.000285274	1.33402	5.81316e-21						AAP18027.1	proX	1.24598
AAP17446.1	cds1895	0.826428	0.000475801	0.942658	2.35227e-09						AAP17796.1	cysA	1.24585
AAP15664.1	yacK	0.823282	0.000325438	1.53059	3.84458e-26						AAP17880.1	guaA	1.2413
AAP19555.1	priB	0.820622	0.000319165	1.31047	2.57501e-20						AAP16713.1	prfA	1.23911
AAP18089.1	cysN	0.818238	0.000332823	1.43966	5.10977e-24						AAP17734.1	yfcA	1.23522
AAP19303.1	mrcA	0.817219	0.000350552	1.13423	1.91426e-15						AAP15915.1	tig	1.23427
AAP15567.1	rpsT	0.817122	0.000340199	1.2492	1.34179e-18						AAP18560.1	cafA	1.23179
AAP18945.1	atpD	0.815602	0.000346064	2.09246	4.45306e-47						AAP18267.1	speC	1.23027
AAP17693.1	nuoC	0.807952	0.000393734	1.77471	5.27964e-35						AAP19083.1	waaI	1.22726
AAP18546.1	rplM	0.806347	0.00040307	1.14645	4.85589e-16						AAP15730.1	yaeC	1.22609
AAP15951.1	adk	0.805039	0.000418091	1.46497	1.20803e-24						AAP15560.1	dnaK	1.22313
AAP17608.1	rplY	0.802444	0.000434048	1.21061	1.41282e-17						AAP15804.1	ykgF	1.22186
AAP19249.1	livM	0.802146	0.000437262	1.75623	3.77149e-34						AAP16674.1	cds1125	1.2211
NP_858211.1	ipaH7	-0.801365	0.000480242	-1.64821	6.26672e-30						AAP16667.1	cds1118	1.221
AAP18733.1	cds3184	-0.80227	0.00247053	-1.2649	2.19101e-11						AAP19158.1	dppA	1.21075
NP_858273.1	mxiK	-0.806783	0.000399956	-0.826323	3.94795e-09						AAP18479.1	yhbT	1.20733
AAP18399.1	ygjG	-0.807325	0.000488172	-1.3795	4.10504e-21						AAP19557.1	rplI	1.20628
AAP15784.1	cds236	-0.80918	0.000419519	-1.51432	9.15255e-26						AAP19354.1	rpsL	1.2042
NP_858221.1	cds4135	-0.810028	0.000553743	-1.00012	2.39536e-11						AAP18978.1	ibpB	1.20342
AAP16673.1	cds1124	-0.811223	0.00649423	-0.754372	0.00107866						AAP18936.1	gidA	1.20087
AAP16902.1	cds1353	-0.811249	0.00111119	-0.633499	0.00013739						AAP18563.1	mreC	1.20058
AAP18706.1	thiC	-0.811783	0.000368586	-1.00805	8.23684e-13						AAP18943.1	atpA	1.20038
AAP17983.1	yfiL	-0.813109	0.000815562	-1.25792	6.08145e-15						AAP16785.1	rnb	1.19772
AAP18339.1	cds2791	-0.813294	0.000373838	-0.714566	4.05134e-07						AAP17424.1	cobS	1.19266
NP_858222.1	cds4136	-0.813905	0.00135807	-1.05072	1.50336e-09						AAP16203.1	cds654	1.18992
NP_858264.1	ipgA	-0.814711	0.000352757	-0.667876	1.92746e-06						AAP16063.1	galT	1.18723
NP_858271.1	mxiI	-0.816785	0.000339234	-0.730084	1.91065e-07						AAP16086.1	sucC	1.18484
AAP15960.1	ybaQ	-0.819692	0.000352223	-1.39651	2.83901e-22						AAP16090.1	sdhB	1.18435
AAP18621.1	yjbO	-0.820264	0.000392275	-2.12415	1.26015e-46						AAP17762.1	cds2214	1.18136
AAP18340.1	exbD	-0.827729	0.000288473	-0.718374	3.22817e-07						AAP16937.1	gapA	1.18022
AAP18767.1	yiiS	-0.829661	0.00031773	-1.36758	4.15503e-21						AAP18966.1	ilvB	1.17955
AAP16888.1	cds1339	-0.82985	0.000295796	-1.47752	1.04255e-24						AAP16632.1	potD	1.17546
AAP16854.1	cds1305	-0.834201	0.000328694	-1.06847	3.65403e-13						AAP18897.1	wecD	1.17545
AAP17270.1	cds1719	-0.837478	0.00109546	-0.564032	0.0013042						AAP19596.1	prfC	1.16872
AAP16407.1	cds859	-0.837845	0.00107919	-0.489811	0.00873807						AAP19356.1	fusA	1.16812
AAP16393.1	ybhH	-0.83805	0.00326938	-1.58476	4.22495e-16						AAP16133.1	lnt	1.16512
AAP18169.1	cds2621	-0.838463	0.00565503	-0.863352	0.000871995						AAP18510.1	yrbA	1.16477
AAP16665.1	cds1116	-0.84181	0.000269924	-1.60869	3.91626e-28						AAP16149.1	ybeN	1.16454
NP_858274.2	mxiN	-0.843004	0.000218209	-0.858063	1.00063e-09						AAP16892.1	prc	1.16285
NP_858261.1	ipaB	-0.843356	0.000216547	-0.804209	9.88388e-09						AAP16156.1	dacA	1.15903
NP_858265.1	icsB	-0.844715	0.000212075	-0.919295	6.25222e-11						AAP16291.1	cds742	1.159
AAP17206.1	yddM	-0.846053	0.00021654	-1.32533	1.62018e-20						AAP16666.1	cds1117	1.15827
AAP15996.1	ybcH	-0.847298	0.000432911	-1.23036	6.55925e-15						AAP17442.1	yeeE	1.15736
AAP17326.1	otsB	-0.848244	0.000262153	-1.28817	1.93983e-18						AAP19379.1	rpmD	1.15601
AAP17271.1	cds1720	-0.848503	0.000387308	-0.599684	0.000147497						AAP19262.1	gntK	1.15528
AAP17902.1	cds2354	-0.852376	0.000187449	-1.38246	2.4e-22						AAP17649.1	nrdA	1.15516
AAP16707.1	ychH	-0.857057	0.000207111	-1.93065	2.91441e-39						AAP19064.1	pyrE	1.14874
AAP17570.1	cds2023	-0.858189	0.000249816	-2.01995	3.73597e-41						AAP16426.1	ycaH	1.14585
AAP18215.1	pgk	-0.863595	0.000153903	-1.13725	8.38846e-16						AAP16314.1	potG	1.1448
NP_858351.1	cds4262	-0.865449	0.00015297	-1.49317	1.61914e-25						AAP15985.1	ybbF	1.14474
AAP17969.1	kgtP	-0.866179	0.000149704	-1.29148	1.07627e-19						AAP19355.1	rpsG	1.1444
AAP17774.1	cds2226	-0.867308	0.000167159	-0.970977	1.80955e-11						AAP18236.1	yqgB	1.12831
NP_858259.1	ipaD	-0.870338	0.000136079	-1.1017	5.76219e-15						AAP19610.1	nadR	1.12438
NP_858270.1	mxiH	-0.875334	0.000124806	-0.834435	2.80573e-09						AAP17594.1	yeiP	1.11975
NP_858267.1	ipgE	-0.878048	0.000118972	-0.72099	2.69237e-07						AAP18759.1	menA	1.1185
AAP17112.1	cds1563	-0.879244	0.000648908	-0.911621	7.29997e-07						AAP18492.1	yhbC	1.11719
AAP16737.1	cds1188	-0.881128	0.000288298	-0.961731	4.50651e-09						AAP16419.1	aroA	1.11343
NP_858262.1	ipgC	-0.881332	0.000112188	-0.937511	2.62819e-11						AAP18509.1	murA	1.11325
AAP19291.1	feoA	-0.882212	0.000115128	-0.696685	7.66318e-07						AAP18158.1	aas	1.11166
NP_858352.1	cds4263	-0.882721	0.000118269	-1.15465	6.22725e-16						AAP18990.1	recF	1.11085
AAP18811.1	yihU	-0.885344	0.000283783	-1.28525	3.32996e-15						AAP17853.1	upp	1.1094
AAP16621.1	ycfQ	-0.888401	0.000112906	-1.32268	4.82083e-20						AAP18962.1	uhpC	1.10736
AAP18277.1	cds2729	-0.889716	0.00140134	-0.819512	5.16655e-05						AAP18885.1	hemD	1.10588
AAP17050.1	cds1501	-0.890507	0.000492116	-1.54651	3.73015e-18						AAP16662.1	cds1113	1.1032
AAP18257.1	cds2709	-0.89476	0.00044	-1.40176	1.19162e-15						NP_858194.1	cds4108	1.10177
AAP17872.1	cds2324	-0.89801	0.000100703	-1.61525	2.15799e-28						AAP15677.1	cds129	1.10175
NP_858263.1	ipgB1	-0.908175	6.95023e-05	-1.19137	3.58685e-17						AAP18893.1	wecF	1.10092
AAP18050.1	cds2502	-0.910536	0.000224259	-1.45757	6.81865e-18						AAP19135.1	glyQ	1.10083
NP_858258.1	ipaA	-0.910993	6.58672e-05	-0.967577	6.11422e-12						AAP18916.1	ilvM	1.10054
NP_858378.1	mvpA	-0.914702	6.30971e-05	-1.4269	1.45608e-23						AAP19533.1	yjeB	1.10032
NP_858368.1	shf	-0.915039	6.13411e-05	-1.59397	6.46116e-29						AAP17428.1	is629b	1.09725
NP_858242.1	cds4155	-0.918187	5.80011e-05	-1.70228	1.54999e-32						AAP18899.1	rffG	1.09659
NP_858260.2	ipaC	-0.921634	5.4185e-05	-1.0836	1.52658e-14						AAP16635.1	potA	1.08954
AAP17583.1	yeiK	-0.924413	0.00126553	-1.47105	1.25507e-12						AAP19084.1	rfaC	1.08941
AAP18408.1	ygjN	-0.931746	6.73333e-05	-2.0484	1.97339e-42						AAP15855.1	cds306	1.08646
AAP16539.1	csgF	-0.932715	0.000427558	-1.39338	3.98923e-14						AAP18235.1	speA	1.08506
NP_858136.1	ospB	-0.93399	4.60205e-05	-2.14058	1.57153e-48						AAP16148.1	holA	1.08445
NP_858350.1	cds4261	-0.937943	4.1291e-05	-1.60438	4.45055e-29						AAP16459.1	pyrD	1.08439
AAP16645.1	cds1096	-0.938775	6.2762e-05	-1.10963	1.53975e-13						AAP17881.1	guaB	1.08277
AAP17213.1	cds1662	-0.947901	0.00073047	-0.970803	1.17072e-05						AAP18264.1	yggX	1.08218
AAP16273.1	dps	-0.948949	3.37259e-05	-1.56925	6.14861e-28						AAP18487.1	rpsO	1.08137
AAP16363.1	cds814	-0.948953	0.00101786	-1.06036	1.84799e-07						AAP16085.1	sucD	1.08115
NP_858192.1	cds4105	-0.95295	3.07292e-05	-1.50272	6.12693e-26						AAP16903.1	cds1354	1.07997
AAP17454.1	hisA	-0.962676	2.55872e-05	-1.46514	8.77984e-25						AAP15561.1	dnaJ	1.07875
NP_858359.2	ipaH9	-0.981393	1.83118e-05	-1.96233	9.48562e-42						AAP16091.1	sdhA	1.07256
AAP16540.1	csgE	-0.986047	9.06849e-05	-1.72821	2.67211e-23						AAP18532.1	gltD	1.06839
AAP16332.1	poxB	-0.988715	2.02196e-05	-1.4783	5.63163e-24						AAP18895.1	wzxE	1.06802
AAP16535.1	ycdU	-0.99092	6.33574e-05	-1.75965	2.61188e-25						AAP17124.1	cds1575	1.05875
AAP17449.1	hisG	-0.992939	1.43265e-05	-1.60684	3.0769e-29						AAP18370.1	ygiD	1.05783
AAP17874.1	trbJ	-0.997496	1.35047e-05	-1.89265	4.46102e-39						AAP16818.1	ycjF	1.05556
AAP15772.1	cds224	-0.998267	2.57279e-05	-1.585	4.2183e-25						AAP16612.1	ptsG	1.0553
AAP18766.1	yiiT	-1.00306	1.25605e-05	-1.34506	5.48879e-21						AAP15632.1	ftsW	1.05511
AAP15931.1	ybaY	-1.00424	1.18706e-05	-1.58658	2.08327e-28						AAP15878.1	tgt	1.05366
AAP17040.1	ydeI	-1.00986	4.01609e-05	-2.04894	5.58044e-34						AAP18383.1	ygiF	1.04972
AAP16678.1	umuD	-1.01196	0.000202875	-1.5119	1.81029e-15						AAP15592.1	apaH	1.04913
NP_858243.2	cds4156	-1.01271	9.62049e-06	-1.88883	3.52611e-39						AAP17070.1	cds1521	1.04866
AAP17873.1	trbL	-1.01342	1.1198e-05	-1.95058	1.92087e-40						AAP19077.1	waaG	1.04703
AAP18635.1	soxR	-1.01416	1.21415e-05	-1.82287	3.80844e-35						AAP17758.1	evgS	1.04644
AAP17584.1	yeiL	-1.01696	4.93148e-05	-1.12749	4.44906e-11						AAP19251.1	livF	1.04258
AAP16759.1	yciF	-1.01949	6.02945e-05	-1.68657	1.11923e-20						AAP16084.1	farR	1.03936
NP_858357.1	ccdA	-1.02055	1.02176e-05	-1.69081	6.6812e-31						AAP19023.1	pstA	1.03732
AAP17392.1	ipaH_5	-1.02225	1.85309e-05	-1.59489	6.35723e-25						AAP17989.1	rpsP	1.03665
AAP17455.1	hisF	-1.02338	7.82994e-06	-1.49771	8.82678e-26						AAP18942.1	atpH	1.03578
AAP17813.1	cds2265	-1.02556	0.00016978	-2.00533	6.60727e-24						AAP18734.1	cds3185	1.03462
AAP18168.1	cds2620	-1.02796	0.00023436	-1.27958	2.26631e-10						AAP17598.1	spr	1.03337
AAP17812.1	cds2264	-1.03306	4.96351e-05	-1.93363	6.33804e-29						AAP16609.1	tmk	1.03302
AAP17006.1	ydiE	-1.03606	6.81395e-06	-1.18133	1.62075e-16						AAP19002.1	yidY	1.02352
AAP16806.1	pspE	-1.03779	6.72775e-06	-1.83485	2.06118e-36						AAP19575.1	hpaF	1.02141
AAP18604.1	xylE	-1.03819	6.97613e-06	-1.80868	3.89726e-35						AAP19292.1	yhgF	1.02023
AAP16361.1	ycaC	-1.03832	1.78581e-05	-1.51415	1.2522e-21						AAP17695.1	nuoA	1.01957
AAP16640.1	cds1091	-1.03849	6.87867e-05	-0.491554	0.0172667						AAP19451.1	pyrB	1.01851
AAP17775.1	cds2227	-1.03902	5.85942e-06	-1.55842	1.40899e-27						AAP17602.1	yejE	1.01838
NP_858191.1	cds4104	-1.04193	6.70764e-06	-1.39	1.36615e-21						AAP17722.1	folC	1.01813
AAP18603.1	yjbA	-1.05866	4.7948e-06	-1.64911	1.42035e-29						AAP15880.1	secD	1.01802
AAP16533.1	cds985	-1.06107	8.6147e-06	-1.24616	2.89491e-15						AAP17988.1	yfjA	1.01653
AAP16541.1	csgD	-1.06801	8.56095e-06	-1.81346	7.6443e-31						AAP18584.1	yrdB	1.01528
AAP17776.1	cds2228	-1.06834	3.1939e-06	-1.58632	1.67017e-28						AAP18636.1	yjcD	1.01206
AAP18746.1	frwC	-1.07997	6.53166e-05	-1.14617	7.4029e-10						AAP18963.1	uhpB	1.00967
NP_858294.1	cds4207	-1.08494	0.000509887	-0.534565	0.0487098						AAP17815.1	cds2267	1.00963
AAP17875.1	cds2327	-1.08595	2.28018e-06	-2.03727	1.56202e-44						AAP18692.1	metA	1.00896
NP_858193.2	cds4106	-1.09546	1.81213e-06	-1.8136	2.90558e-36						AAP19250.1	livG	1.00693
AAP17456.1	hisI	-1.09603	1.74388e-06	-1.60692	2.80642e-29						AAP18117.1	yqcB	1.00292
YP_001449237.1	ospE1	-1.11029	2.16051e-06	-2.22801	3.97006e-49						AAP16769.1	yciL	1.0024
AAP16758.1	yciE	-1.11333	3.41727e-06	-1.6066	9.61244e-25						AAP18394.1	rpsU	1.00213
AAP16467.1	rmf	-1.11891	1.06088e-06	-1.63969	2.12748e-30						AAP16425.1	msbA	1.0005
AAP16805.1	pspD	-1.13143	1.07511e-06	-2.16083	2.47155e-48						AAP15934.1	ybaA	0.996361
AAP17172.1	ynhG	-1.13262	8.24598e-07	-1.08752	1.79592e-14						AAP16597.1	yceC	0.991523
AAP16519.1	ycdF	-1.14116	3.0321e-06	-1.70735	9.23552e-26						AAP17531.1	metG	0.991231
AAP19597.1	osmY	-1.15944	4.65701e-07	-1.56428	1.16558e-27						AAP18771.1	sbp	0.990467
AAP17453.1	hisH	-1.1772	2.97236e-07	-1.59584	6.72428e-29						AAP16164.1	cspE	0.989676
AAP16579.1	grxB	-1.18463	2.57184e-07	-1.48354	2.97187e-25						AAP15847.1	gtrII	0.985978
AAP17978.1	yfiA	-1.19545	1.93484e-07	-1.78285	2.39736e-35						AAP16774.1	topA	0.985634
AAP18527.1	yrbL	-1.20054	1.71972e-07	-1.53998	3.65095e-27						AAP18848.1	cds3299	0.984607
AAP17588.1	fruA	-1.21564	1.24876e-07	-0.818788	6.22932e-09						AAP18531.1	gltB	0.983503
AAP18974.1	yidL	-1.21714	5.40333e-07	-1.47586	6.59505e-21						AAP17986.1	rplS	0.983301
AAP17201.1	osmC	-1.22525	9.81963e-08	-1.84522	1.44724e-37						AAP17993.1	grpE	0.980443
AAP16028.1	entE	-1.23116	1.60975e-07	-1.72192	8.71145e-31						AAP17887.1	hisS	0.978645
AAP16804.1	pspC	-1.2393	8.30261e-08	-2.26174	2.95164e-53						AAP16226.1	cds677	0.97785
AAP16295.1	cds746	-1.24865	7.99757e-08	-1.94992	6.76295e-40						AAP19090.1	cds3541	0.977277
AAP17452.1	hisB	-1.2627	4.03681e-08	-1.783	2.43979e-35						AAP16742.1	oppA	0.977149
AAP16110.1	ybfA	-1.29067	2.684e-08	-2.0996	5.54688e-46						AAP17987.1	trmD	0.976533
AAP17543.1	cds1996	-1.29246	2.1365e-08	-1.94373	6.48768e-41						AAP18941.1	atpF	0.976456
AAP17450.1	hisD	-1.33396	7.12635e-09	-2.02579	2.0953e-44						AAP17571.1	mglC	0.976033
AAP18814.1	yihR	-1.33588	2.34003e-07	-1.73209	1.33714e-23						AAP16817.1	ycjX	0.975701
AAP16267.1	cds718	-1.34672	2.72586e-07	-1.64118	4.15809e-20						AAP18620.1	yjbN	0.974824
AAP15686.1	fhuA	-1.35314	4.38785e-09	-1.08806	1.29699e-14						AAP17623.1	napB	0.974247
AAP18802.1	cds3253	-1.37599	1.08991e-05	-1.71871	4.59229e-14						AAP19300.1	yrfG	0.974161
AAP17544.1	cds1997	-1.37862	5.34498e-06	-1.11408	4.11791e-07						AAP19091.1	yibD	0.973911
AAP17041.1	cds1492	-1.38386	1.40775e-05	-1.91521	2.96293e-15						AAP18933.1	asnA	0.973893
AAP17259.1	ipaH_4	-1.38495	4.61664e-09	-2.38388	7.59297e-56						AAP16602.1	fabH	0.972577
AAP17981.1	tyrA	-1.38905	1.75644e-09	-0.764729	5.29376e-08						AAP18545.1	rpsI	0.969934
AAP16622.1	ycfR	-1.42063	1.07262e-09	-2.69355	6.67785e-72						AAP16603.1	fabD	0.969027
YP_001449236.1	ospE2	-1.42432	2.28593e-09	-2.73428	2.1e-67						AAP17018.1	cds1469	0.966677
AAP16803.1	pspB	-1.43457	6.87981e-10	-2.32013	1.50935e-55						AAP18989.1	gyrB	0.966592
AAP19564.1	cds4014	-1.446	3.43052e-06	-1.79713	9.06369e-14						AAP19054.1	recG	0.966152
AAP17258.1	cds1707	-1.44606	8.15919e-10	-2.351	8.70021e-55						AAP17951.1	lepB	0.965374
AAP16802.1	pspA	-1.45007	3.64747e-10	-2.32526	1.23349e-56						AAP18858.1	yigM	0.960026
NP_858183.2	cds4097	-1.46914	4.22108e-10	-2.74668	1.9934e-72						AAP19378.1	rpsE	0.959098
AAP19029.1	cds3480	-1.47604	8.50183e-08	-1.50565	4.97701e-12						AAP15894.1	yajK	0.957147
AAP19359.1	bfr	-1.48181	1.53572e-10	-1.18791	5.08746e-17						AAP16423.1	rpsA	0.955502
NP_858182.2	insA	-1.48522	5.21929e-09	-2.04772	4.46127e-32						AAP18374.1	cds2826	0.951993
AAP16068.1	cds519	-1.51813	9.75093e-11	-2.35555	6.371e-56						AAP15716.1	rnhB	0.951557
AAP17982.1	aroF	-1.52188	4.92237e-11	-1.18887	4.28115e-17						AAP19275.1	glpG	0.950655
AAP17451.1	hisC	-1.55414	2.02088e-11	-2.15832	9.92949e-50						AAP18712.1	rpoB	0.946089
AAP19035.1	imm	-1.55447	2.0685e-11	-1.5565	1.42787e-27						AAP15679.1	pcnB	0.945956
AAP17278.1	cds1727	-1.65361	2.67232e-12	-0.966624	7.7904e-11						AAP18995.1	yidC	0.944841
AAP19358.1	yheA	-1.70331	2.68202e-13	-1.44955	3.0331e-24						AAP16292.1	cds743	0.944164
AAP19036.1	shiE	-1.78056	3.97519e-14	-1.4864	2.01754e-24						AAP19092.1	yibQ	0.943985
AAP17777.1	mntH	-1.78257	2.37673e-14	-1.85657	9.32603e-38						AAP19295.1	envZ	0.943212
AAP18216.1	epd	-1.78963	1.76335e-14	-2.31915	1.69958e-56						AAP15642.1	mutT	0.942682
AAP17589.1	fruK	-1.80711	1.08131e-14	-1.73652	1.76859e-33						AAP16786.1	yciW	0.939529
AAP17590.1	fruB	-1.85269	2.49506e-15	-1.95637	1.53393e-41						AAP18900.1	wecC	0.938075
AAP16738.1	adhE	-1.88513	7.99037e-16	-2.26648	2.58519e-54						AAP15802.1	cds254	0.937901
AAP19590.1	bglJ	-1.98584	4.3044e-17	-1.47929	1.39275e-24						AAP19185.1	yhiE	0.936286
AAP17177.1	ynhE	-1.99697	1.94255e-17	-1.6993	2.25681e-32						AAP19098.1	gpsA	0.933309
AAP16027.1	fepB	-2.05038	3.57062e-18	-2.02116	6.49899e-44						AAP19362.1	rplD	0.931938
AAP19591.1	fhuF	-2.05702	2.4963e-18	-1.64463	1.66898e-30						AAP19381.1	prlA	0.93183
AAP17276.1	sitC	-2.08496	9.14543e-19	-1.57061	4.29897e-28						AAP18559.1	yhdP	0.931629
AAP17178.1	ydiC	-2.09176	8.34176e-19	-2.02693	4.7464e-44						AAP19201.1	prlC	0.92728
AAP16024.1	fepG	-2.1169	1.8045e-18	-2.11844	8.5886e-45						AAP17645.1	gyrA	0.920126
AAP18024.1	nrdF	-2.13069	2.11982e-19	-1.92302	4.13916e-40						AAP18490.1	infB	0.919558
AAP18023.1	nrdE	-2.14417	1.14361e-19	-1.9769	1.88108e-42						AAP16847.1	ydbK	0.918243
AAP16023.1	fepC	-2.14656	8.05308e-19	-1.77848	4.9553e-31						AAP17121.1	cds1572	0.918166
AAP17176.1	ynhD	-2.16988	4.56319e-20	-1.90632	9.70763e-40						AAP17611.1	yejM	0.918162
AAP18021.1	nrdH	-2.17121	7.96231e-20	-2.46776	1.60645e-61						AAP17616.1	ccmF	0.914623
AAP17275.1	sitB	-2.17755	3.26303e-20	-1.58092	1.81934e-28						AAP17624.1	napH	0.914523
AAP17175.1	ynhC	-2.18251	2.7984e-20	-2.07146	3.42306e-46						AAP16155.1	rlpA	0.914191
AAP18022.1	nrdI	-2.20919	1.41463e-20	-2.42555	1.77615e-60						AAP15661.1	speD	0.912593
AAP17277.1	sitD	-2.21538	8.37462e-21	-1.89153	2.90277e-39						AAP17378.1	cds1827	0.911388
AAP17174.1	cds1623	-2.25554	1.96048e-21	-2.15074	2.47132e-49						AAP19253.1	ugpA	0.910835
AAP16025.1	fepD	-2.27861	1.46635e-21	-2.22394	3.8899e-51						AAP19125.1	avtA	0.909124
AAP17274.1	sitA	-2.28452	6.22694e-22	-2.01056	7.06354e-44						AAP16845.1	ydaO	0.908674
AAP16017.1	entD	-2.30892	7.91417e-22	-2.47454	5.67384e-60						AAP15633.1	murG	0.908617
AAP17173.1	ynhA	-2.48252	3.65485e-25	-2.36062	6.40685e-58						AAP19066.1	dut	0.908452
AAP16026.1	ybdA	-2.49837	2.42942e-25	-2.23817	2.62438e-52						AAP16153.1	mrdA	0.907504
AAP19033.1	iucB	-2.53211	4.33892e-26	-2.44429	5.54627e-62						AAP17254.1	yebC	0.905283
AAP19034.1	iucA	-2.54913	2.15193e-26	-2.47113	3.18535e-63						AAP16316.1	potI	0.905188
AAP19031.1	iucD	-2.62748	8.82101e-28	-2.69475	1.40441e-73						AAP17242.1	edd	0.905065
AAP19032.1	iucC	-2.67218	1.40808e-28	-2.59217	9.12435e-69						AAP16614.1	ycfL	0.904787
AAP19030.1	iutA	-2.88869	1.49593e-32	-2.71619	1.42408e-74						AAP16791.1	sapC	0.903914
AAP16020.1	entF	-4.12487	7.65726e-58	-4.20022	1.21329e-153						AAP18823.1	glnA	0.902402
AAP16018.1	fepA	-4.30242	1.09008e-61	-4.39286	1.21065e-164						AAP17575.1	yeiB	0.901889
AAP16019.1	fes	-4.39676	1.86089e-63	-4.39978	7.9495e-164						AAP16087.1	sucB	0.901053
											AAP17125.1	ydgQ	0.898976
											AAP18874.1	yigB	0.898202
											AAP19254.1	ugpE	0.897051
											AAP17789.1	cysK	0.896114
											AAP19482.1	cycA	0.894863
											AAP17716.1	hisJ	0.892909
											AAP16962.1	ydjY	0.892781
											AAP18263.1	mutY	0.891554
											AAP16613.1	ycfF	0.890218
											AAP18690.1	iclR	0.890002
											AAP16762.1	trpB	0.889898
											AAP19069.1	rpmB	0.889823
											AAP16348.1	infA	0.888979
											AAP18824.1	glnL	0.887154
											AAP19065.1	ttk	0.886435
											AAP18486.1	pnp	0.885919
											AAP18506.1	rplU	0.885135
											AAP15618.1	ilvI	0.884107
											AAP16290.1	cds741	0.882833
											AAP18917.1	ilvG	0.882584
											AAP18369.1	ygiC	0.881729
											AAP18237.1	yqgC	0.881067
											AAP19093.1	yibP	0.880392
											AAP17534.1	yehP	0.879924
											AAP16122.1	glnS	0.879291
											AAP19021.1	phoU	0.879037
											AAP18138.1	ygdL	0.878112
											AAP17335.1	yecA	0.877652
											AAP18252.1	yggW	0.876296
											AAP18488.1	truB	0.874158
											AAP19276.1	glpR	0.873631
											AAP18002.1	cds2454	0.872997
											AAP18713.1	rplL	0.872519
											AAP17576.1	folE	0.871803
											AAP17546.1	cds1999	0.869958
											AAP19309.1	aroB	0.869887
											AAP16604.1	fabG	0.869338
											AAP18876.1	yigA	0.86863
											AAP19338.1	yhfK	0.868076
											AAP19137.1	cds3588	0.868005
											AAP16601.1	plsX	0.864856
											AAP15709.1	yaeL	0.862641
											AAP15728.1	yaeB	0.862251
											AAP17834.1	ypfI	0.861834
											AAP16129.1	yleA	0.861646
											AAP16147.1	rlpB	0.859654
											AAP18875.1	xerC	0.857711
											AAP16045.1	rnk	0.857266
											NP_858245.1	cds4158	0.853803
											AAP18631.1	cds3082	0.853388
											AAP18042.1	mltB	0.852089
											AAP19606.1	cds4056	0.850957
											AAP16763.1	trpC	0.850155
											AAP18157.1	ygeD	0.850026
											AAP16904.1	cds1355	0.847364
											AAP15708.1	cdsA	0.847004
											AAP18822.1	yihK	0.846592
											AAP18571.1	panF	0.846246
											AAP16032.1	cstA	0.845991
											AAP16271.1	glnP	0.845962
											AAP15593.1	apaG	0.843901
											AAP19384.1	rpsK	0.843517
											AAP17676.1	menD	0.839727
											AAP17673.1	menC	0.838261
											AAP18239.1	metK	0.836569
											AAP17957.1	yfiC	0.836033
											AAP17992.1	yfjD	0.835795
											AAP17835.1	cds2287	0.835412
											AAP19063.1	rph	0.835262
											AAP18229.1	tktA	0.833601
											AAP18388.1	ygiH	0.830461
											AAP15678.1	folK	0.830231
											AAP19377.1	rplR	0.830231
											AAP15594.1	ksgA	0.829925
											AAP18513.1	vpsC	0.829532
											AAP16276.1	ybiP	0.828707
											AAP15595.1	pdxA	0.828666
											AAP16270.1	glnQ	0.828632
											AAP16658.1	ycfB	0.826818
											AAP18351.1	sufI	0.824675
											AAP18203.1	ygfA	0.824026
											AAP17907.1	hcaT	0.822944
											AAP19529.1	hflK	0.822776
											AAP19079.1	waaL	0.81713
											AAP19080.1	waaY	0.814954
											AAP18940.1	atpE	0.814508
											AAP15889.1	thiL	0.813852
											AAP19499.1	yjeH	0.81357
											AAP16427.1	ycaQ	0.812947
											AAP16463.1	uup	0.812017
											AAP19245.1	livJ	0.810861
											AAP15717.1	dnaE	0.810146
											AAP19433.1	yjgR	0.809786
											AAP16080.1	cydB	0.809581
											AAP18491.1	nusA	0.809579
											AAP18149.1	thyA	0.807897
											AAP18901.1	wecB	0.80376
											AAP19097.1	secB	0.802071
											AAP16997.1	pheS	0.801879
											AAP17735.1	mepA	0.801731
											AAP17824.1	cds2276	0.800586
											AAP19467.1	ppa	0.800585
											AAP17463.1	rfbJ	0.798812
											AAP17181.1	ydiJ	0.796844
											AAP17462.1	cds1911	0.796784
											AAP16280.1	ybiT	0.79494
											AAP18738.1	argE	0.79321
											AAP17573.1	mglB	0.792064
											AAP17253.1	ruvC	0.791834
											AAP16441.1	ompF	0.788955
											AAP19306.1	yrfB	0.788467
											AAP16406.1	cds858	0.78709
											AAP16181.1	cds632	0.786701
											AAP17806.1	cds2258	0.785942
											AAP18714.1	rplJ	0.784058
											AAP17885.1	cds2337	0.78346
											AAP17246.1	msbB	0.782754
											AAP18886.1	hemX	0.781885
											AAP19363.1	rplW	0.779056
											AAP19376.1	rplF	0.778584
											AAP15644.1	yacG	0.778397
											AAP18142.1	recD	0.7783
											AAP18126.1	fucO	0.777989
											AAP15600.1	hepA	0.777275
											AAP15620.1	fruL	0.776362
											AAP18908.1	gppA	0.776162
											AAP16204.1	ybcQ	0.775115
											AAP18965.1	ilvN	0.773468
											AAP15859.1	proC	0.772412
											AAP16629.1	ycfW	0.771441
											AAP16628.1	ycfV	0.770958
											AAP19136.1	glyS	0.770341
											AAP18859.1	yigL	0.768705
											AAP16705.1	ychF	0.767733
											AAP17097.1	cds1548	0.767099
											AAP19296.1	pckA	0.766934
											AAP15707.1	yaeS	0.766656
											AAP18894.1	yifM	0.765685
											AAP19007.1	yieG	0.765016
											AAP19397.1	iadA	0.764402
											AAP19353.1	yheL	0.764389
											AAP17374.1	yedA	0.764211
											AAP15798.1	tauA	0.763825
											AAP19095.1	yibN	0.763184
											AAP19247.1	livK	0.76307
											AAP15918.1	lon	0.762133
											AAP15734.1	yafB	0.761797
											AAP19022.1	pstB	0.758316
											AAP19361.1	rplC	0.756237
											AAP19530.1	hflC	0.755881
											AAP19205.1	pitA	0.755751
											AAP16150.1	phpB	0.753092
											AAP19439.1	yjgN	0.752722
											AAP16062.1	galE	0.751325
											AAP19375.1	rpsH	0.750508
											AAP18343.1	metC	0.749127
											AAP16766.1	trpL	0.748626
											AAP17597.1	cds2050	0.748604
											AAP15982.1	arcC	0.746134
											AAP18842.1	fadA	0.744895
											AAP19360.1	rpsJ	0.74432
											AAP16599.1	yceD	0.744066
											AAP18382.1	glnE	0.743742
											AAP16260.1	ybiA	0.74371
											AAP17304.1	argS	0.743303
											AAP18183.1	lysS	0.742331
											AAP18857.1	metR	0.741701
											AAP18038.1	alaS	0.741411
											AAP17840.1	hyfA	0.741318
											AAP19314.1	trpS	0.740948
											AAP18361.1	parE	0.740641
											AAP18939.1	atpB	0.73997
											AAP18478.1	yhbS	0.739125
											AAP16627.1	ycfU	0.738931
											AAP18847.1	yigU	0.738599
											AAP19371.1	rplN	0.738202
											AAP18586.1	yrdC	0.737075
											AAP18251.1	yggV	0.736658
											AAP15643.1	cds95	0.734881
											AAP15983.1	purK	0.733997
											AAP19082.1	waaD	0.733793
											AAP17958.1	srmB	0.733321
											AAP15919.1	hupB	0.733115
											AAP19327.1	yhfL	0.732059
											AAP18353.1	parC	0.730664
											AAP17756.1	emrK	0.729938
											AAP18829.1	polA	0.729092
											AAP19243.1	ftsX	0.728992
											AAP16764.1	trpD	0.728958
											AAP19070.1	rpmG	0.728818
											AAP18896.1	wecE	0.728066
											AAP15890.1	pgpA	0.725876
											AAP19078.1	waaP	0.725455
											AAP16874.1	cds1325	0.725238
											AAP19492.1	cds3942	0.724954
											AAP15845.1	cds296	0.723915
											AAP16900.1	yebH	0.723764
											AAP18704.1	yjaD	0.722899
											AAP18583.1	yrdA	0.721898
											AAP19222.1	yhhJ	0.720618
											AAP16152.1	ybeA	0.71879
											AAP17384.1	cds1833	0.718637
											AAP18630.1	ssb	0.717293
											AAP17634.1	ompC	0.715627
											AAP17116.1	add	0.715478
											AAP15631.1	murD	0.715128
											AAP18362.1	yqiA	0.714423
											AAP18118.1	cds2570	0.713364
											AAP18406.1	ygjL	0.7125
											AAP16792.1	sapB	0.711571
											AAP19372.1	rplX	0.711003
											AAP18731.1	cds3182	0.710323
											AAP19563.1	cds4013	0.70962
											AAP16289.1	cds740	0.709085
											AAP18948.1	glmS	0.708372
											AAP19081.1	waaJ	0.707639
											AAP15619.1	ilvH	0.707558
											AAP17470.1	rfbA	0.706683
											AAP18718.1	secE	0.704719
											AAP17930.1	cds2382	0.704555
											AAP18964.1	uhpA	0.704077
											AAP16657.1	ycfC	0.703469
											AAP17354.1	nmpC	0.703242
											AAP19605.1	deoD	0.702854
											AAP16898.1	cds1349	0.702816
											AAP19307.1	hofQ	0.702631
											AAP19263.1	gntU	0.701964
											AAP15628.1	murE	0.698561
											AAP17120.1	cds1571	0.698003
											AAP17633.1	yojL	0.697436
											AAP18238.1	yqgD	0.697326
											AAP18250.1	yggU	0.696912
											AAP17605.1	bcr	0.696306
											AAP18150.1	lgt	0.694703
											AAP15946.1	apt	0.692276
											AAP16041.1	ahpF	0.691575
											AAP17443.1	yeeF	0.691574
											AAP16624.1	mfd	0.690862
											AAP18937.1	gidB	0.690402
											AAP18715.1	rplA	0.690079
											AAP18085.1	ygbP	0.68951
											AAP18716.1	rplK	0.689431
											AAP17809.1	yfeG	0.689104
											AAP19297.1	yhgE	0.687024
											AAP18505.1	rpmA	0.685101
											AAP19364.1	rplB	0.685034
											AAP16656.1	purB	0.684634
											AAP17096.1	cds1547	0.68373
											AAP18730.1	oxyR	0.683573
											AAP17779.1	cds2231	0.682005
											AAP18932.1	yieM	0.681547
											AAP18711.1	rpoC	0.681156
											AAP17341.1	yecC	0.681085
											AAP16335.1	ybjE	0.680982
											AAP18025.1	proV	0.680869
											AAP17610.1	yejL	0.680039
											AAP18844.1	yigC	0.679754
											AAP15704.1	pyrH	0.678653
											AAP15703.1	tsf	0.678565
											AAP15969.1	ybbN	0.677622
											AAP15710.1	yaeT	0.677471
											AAP18547.1	yhcM	0.677152
											AAP16899.1	cspC	0.672586
											AAP16101.1	ybgJ	0.671811
											AAP17718.1	ubiX	0.671219
											AAP15715.1	lpxB	0.670858
											AAP19012.1	cds3463	0.670043
											AAP17542.1	yehU	0.669681
											AAP16499.1	ymcB	0.669677
											NP_858324.1	cds4235	0.669566
											AAP19310.1	damX	0.668359
											AAP18095.1	ygcM	0.667411
											AAP16263.1	ybiC	0.667279
											AAP18470.1	yraN	0.667211
											AAP18031.1	emrR	0.667058
											AAP19096.1	grxC	0.666846
											AAP17786.1	lig	0.665825
											AAP18676.1	yjdH	0.665353
											AAP16151.1	ybeB	0.665278
											AAP16844.1	dbpA	0.664383
											AAP18863.1	recQ	0.663233
											AAP19382.1	rpmJ	0.662298
											AAP16940.1	cds1391	0.661231
											AAP16396.1	ybhC	0.660888
											AAP16136.1	gltK	0.660804
											AAP17967.1	pssA	0.658977
											AAP15591.1	folA	0.658287
											AAP18127.1	fucA	0.658093
											AAP17746.1	fadL	0.657902
											AAP18703.1	hemE	0.656128
											AAP19085.1	rfaF	0.655861
											AAP19452.1	pyrI	0.655525
											AAP15805.1	ykgE	0.654656
											AAP16313.1	potF	0.654327
											AAP19124.1	yiaI	0.654073
											AAP17555.1	yehW	0.652352
											AAP18041.1	ygaD	0.651617
											AAP16227.1	cds678	0.651245
											AAP16093.1	sdhC	0.65101
											AAP15613.1	leuC	0.649707
											AAP16261.1	dinG	0.649387
											AAP15739.1	dniR	0.649344
											AAP15621.1	fruR	0.648767
											AAP16765.1	trpE	0.646719
											AAP18912.1	ilvY	0.646108
											AAP17160.1	cds1609	0.645967
											AAP19305.1	yrfC	0.64547
											AAP15913.1	yajG	0.643091
											AAP17974.1	clpB	0.642777
											AAP15608.1	yabK	0.642124
											AAP18992.1	dnaA	0.641992
											AAP18084.1	ygbB	0.640343
											AAP16789.1	sapF	0.63995
											AAP19374.1	rpsN	0.639635
											AAP18198.1	visC	0.639582
											AAP18457.1	cds2908	0.639015
											AAP18030.1	ygaH	0.638741
											AAP19076.1	waaQ	0.638228
											AAP17126.1	nth	0.63799
											AAP15641.1	secA	0.637499
											AAP17948.1	recO	0.636641
											AAP18592.1	sun	0.636487
											AAP19622.1	lasT	0.636088
											AAP19252.1	ugpB	0.635841
											AAP19053.1	gltS	0.635362
											AAP19343.1	yheT	0.634268
											AAP18413.1	ygjT	0.634129
											AAP16092.1	sdhD	0.633966
											AAP17672.1	menE	0.633697
											AAP18880.1	cds3331	0.633081
											AAP18843.1	ubiB	0.632849
											AAP19498.1	cds3948	0.632626
											AAP15972.1	ybbB	0.632268
											AAP18747.1	katG	0.632025
											AAP16044.1	cds495	0.631558
											AAP18717.1	nusG	0.630408
											AAP19308.1	aroK	0.630182
											AAP15883.1	tsx	0.630023
											AAP17626.1	napA	0.629897
											AAP15984.1	purE	0.629741
											AAP19188.1	hdeB	0.629316
											AAP19517.1	yjeP	0.628902
											AAP19154.1	tag	0.62766
											AAP17148.1	rnt	0.627543
											AAP19062.1	yicC	0.626995
											AAP17127.1	ydgR	0.626328
											AAP17625.1	napG	0.62606
											AAP15563.1	nhaA	0.625523
											AAP16998.1	pheT	0.624051
											AAP15650.1	ppdD	0.623533
											AAP15926.1	mdlA	0.620696
											AAP18431.1	yhaJ	0.618971
											AAP19057.1	rpoZ	0.618503
											AAP17150.1	ydhD	0.615904
											AAP17044.1	ydeD	0.615731
											AAP18695.1	purD	0.614922
											AAP18139.1	mltA	0.614828
											AAP17372.1	cds1821	0.613081
											AAP17010.1	ydiD	0.612622
											AAP16551.1	mdoH	0.612237
											AAP18389.1	ygiP	0.611618
											AAP16034.1	ybdL	0.611263
											AAP15634.1	murC	0.611035
											AAP16113.1	potE	0.610293
											AAP18368.1	ygiB	0.609577
											AAP16088.1	sucA	0.60859
											AAP17650.1	nrdB	0.608154
											AAP16570.1	yceA	0.607931
											AAP16600.1	rpmF	0.607683
											AAP18324.1	gsp	0.607298
											AAP17564.1	yohI	0.607224
											AAP19246.1	yhhK	0.607037
											AAP15629.1	murF	0.605694
											AAP16949.1	sppA	0.604946
											AAP17180.1	cds1629	0.604112
											AAP16158.1	lipB	0.60332
											AAP17854.1	purM	0.602441
											AAP17095.1	pntA	0.60225
											AAP18841.1	fadB	0.601955
											AAP18869.1	corA	0.601155
											AAP15939.1	acrB	0.600205
											AAP16132.1	ybeX	0.598124
											AAP18109.1	mazG	0.597701
											AAP18409.1	ygjO	0.595581
											AAP15887.1	ribH	0.595512
											AAP17339.1	yecF	0.595379
											AAP17471.1	rfbD	0.595191
											AAP17017.1	cds1468	0.594597
											AAP16790.1	sapD	0.594073
											AAP16350.1	cydC	0.593683
											AAP17130.1	tyrS	0.59124
											AAP19437.1	holC	0.590915
											AAP18855.1	cds3306	0.590732
											AAP18924.1	rbsK	0.589447
											AAP17376.1	dcm	0.588596
											AAP15656.1	aceE	0.588264
											AAP18503.1	yhbZ	0.587715
											AAP16497.1	yccZ	0.585608
											NP_858156.1	cds4073	0.5856
											AAP15732.1	abc	0.584937
											AAP17493.1	asmA	0.584237
											AAP15718.1	accA	0.584059
											AAP17535.1	yehQ	0.584012
											AAP18923.1	rbsR	0.583779
											AAP19349.1	fkpA	0.583141
											AAP17204.1	sfcA	0.583045
											AAP17536.1	cds1989	0.582598
											AAP18570.1	yhdT	0.582435
											AAP17342.1	yecS	0.58242
											AAP18795.1	fdoG	0.582334
											AAP16007.1	pheP	0.581873
											AAP18950.1	lpfA	0.581789
											AAP15662.1	speE	0.581766
											AAP18664.1	basR	0.580813
											AAP19595.1	yjjG	0.580186
											AAP15949.1	recR	0.579062
											AAP19113.1	selA	0.578468
											AAP16418.1	serC	0.578053
											AAP18887.1	hemY	0.578008
											AAP19574.1	hpaH	0.577925
											AAP18249.1	yggT	0.577907
											AAP16344.1	ybjZ	0.577888
											AAP17952.1	lepA	0.577757
											AAP16891.1	yebJ	0.576587
											AAP17733.1	cds2185	0.576331
											AAP17469.1	rfbC	0.575525
											AAP18752.1	yiiX	0.575362
											AAP17472.1	rfbB	0.574163
											AAP19507.1	efp	0.574046
											AAP18476.1	yhbP	0.573468
											AAP18495.1	secG	0.572915
											AAP17609.1	yejK	0.572482
											AAP18372.1	ribB	0.572273
											AAP19511.1	frdD	0.572231
											AAP15885.1	ybaD	0.57174
											AAP15868.1	yajF	0.570717
											AAP16218.1	cds669	0.569615
											AAP18967.1	ivbL	0.568839
											AAP17619.1	ccmC	0.568714
											AAP18367.1	ygiA	0.568509
											AAP19461.1	yjgA	0.568497
											AAP17674.1	menB	0.568161
											AAP16351.1	cydD	0.567102
											AAP17823.1	cds2275	0.564831
											AAP19373.1	rplE	0.564682
											AAP19100.1	yibK	0.564386
											AAP18902.1	wzzE	0.563977
											AAP15879.1	yajC	0.563952
											AAP16712.1	hemA	0.561253
											AAP15580.1	caiD	0.561028
											AAP18489.1	rbfA	0.560634
											AAP19528.1	hflX	0.559941
											AAP16073.1	pal	0.558792
											AAP18852.1	ubiE	0.558507
											AAP18702.1	nfi	0.558427
											AAP17782.1	gltX	0.55819
											AAP18892.1	wecG	0.557895
											AAP18140.1	cds2592	0.557775
											AAP19524.1	amiB	0.556486
											AAP18602.1	yjbH	0.55633
											AAP17375.1	vsr	0.555597
											AAP17723.1	accD	0.555503
											AAP16146.1	leuS	0.555072
											AAP16468.1	fabA	0.554284
											AAP16584.1	mviN	0.554284
											AAP19388.1	cds3839	0.553737
											AAP15888.1	nusB	0.553533
											AAP18957.1	yicM	0.553091
											AAP18601.1	yjbG	0.552213
											AAP17035.1	cds1486	0.551746
											AAP18821.1	yihL	0.55099
											AAP18458.1	cds2909	0.549716
											AAP19385.1	rpsD	0.54782
											AAP18558.1	tldD	0.547224
											AAP18903.1	rfe	0.547065
											AAP16104.1	phrB	0.54627
											AAP19278.1	rtcB	0.5453
											AAP17521.1	yegX	0.545016
											AAP18113.1	ygcX	0.544798
											AAP15614.1	leuB	0.544403
											AAP18850.1	yigR	0.544341
											AAP17599.1	rtn	0.543464
											AAP18991.1	dnaN	0.54213
											AAP16469.1	cds921	0.541364
											AAP16660.1	ymfC	0.540566
											AAP16687.1	cds1138	0.538665
											AAP15668.1	yadG	0.538541
											AAP18376.1	cds2828	0.537643
											AAP15657.1	aceF	0.537171
											AAP17732.1	cds2184	0.534288
											AAP15570.1	ileS	0.534138
											AAP15645.1	yacF	0.532887
											AAP17295.1	cds1744	0.531754
											AAP17704.1	pta	0.531608
											AAP19322.1	yhfS	0.531417
											AAP17156.1	ydhC	0.530724
											AAP18103.1	cds2555	0.529309
											AAP18244.1	gshB	0.529222
											AAP18929.1	kup	0.528557
											AAP15689.1	fhuB	0.52817
											AAP17949.1	era	0.527571
											AAP16009.1	nfnB	0.526514
											AAP19438.1	valS	0.525898
											AAP18867.1	yigG	0.525423
											AAP18356.1	ygiX	0.522312
											AAP19383.1	rpsM	0.521627
											AAP15891.1	dxs	0.521116
											AAP18494.1	yhbX	0.520354
											AAP17675.1	yfbB	0.520343
											AAP18693.1	yjaB	0.516927
											AAP16318.1	ybjF	0.516713
											AAP16255.1	ybhS	0.515784
											AAP17855.1	purN	0.514936
											AAP19460.1	pmbA	0.514918
											AAP15954.1	gsk	0.514136
											AAP17743.1	cds2195	0.514057
											AAP15867.1	yaiD	0.512776
											AAP17541.1	yehT	0.510741
											AAP17990.1	ffh	0.509009
											AAP17592.1	cds2045	0.507934
											AAP17423.1	cobT	0.507872
											AAP16995.1	rplT	0.507849
											AAP17882.1	xseA	0.507658
											AAP17506.1	yegQ	0.507454
											AAP18265.1	mltC	0.50592
											AAP16057.1	modB	0.504667
											AAP15555.1	mog	0.503774
											AAP19594.1	rimI	0.503502
											AAP16610.1	holB	0.503403
											AAP15893.1	xseB	0.502406
											AAP19456.1	treB	0.501937
											AAP18473.1	yraQ	0.501376
											AAP15848.1	gtrBI	0.501076
											AAP16501.1	ymcD	0.500778
											AAP18053.1	hydN	0.500201
											AAP15968.1	ybbM	0.49985
											AAP16131.1	ybeY	0.499019
											AAP15925.1	ybaO	0.499005
											AAP17651.1	yfaE	0.498691
											AAP19344.1	yheS	0.498325
											AAP19221.1	yhiH	0.497664
											AAP15590.1	kefC	0.497441
											AAP18081.1	pcm	0.4963
											AAP18243.1	yggJ	0.496269
											AAP16442.1	asnS	0.495022
											AAP19365.1	rpsS	0.494966
											AAP16964.1	xthA	0.493079
											AAP16952.1	topB	0.492392
											AAP16256.1	ybhF	0.492246
											AAP16462.1	ycbY	0.490687
											AAP17350.1	yedD	0.489603
											AAP16114.1	pgm	0.4891
											AAP16466.1	ymbA	0.488642
											AAP17038.1	dcp	0.48699
											AAP17337.1	uvrC	0.486252
											AAP19347.1	slyD	0.485943
											AAP15565.1	cds17	0.484891
											AAP17830.1	acrD	0.484349
											AAP15566.1	cds18	0.484042
											AAP15582.1	caiB	0.484029
											AAP19171.1	yhjK	0.483885
											AAP19334.1	yhfG	0.483831
											AAP16761.1	trpA	0.482871
											AAP15660.1	yacL	0.482755
											AAP18866.1	rarD	0.482689
											AAP18514.1	vpsB	0.482134
											AAP15712.1	lpxD	0.481991
											AAP17087.1	mlc	0.481191
											AAP18659.1	phnA	0.481148
											AAP15961.1	ybaR	0.480305
											AAP15947.1	dnaX	0.479878
											AAP17708.1	yfcF	0.479293
											AAP18777.1	yiiM	0.479227
											AAP18877.1	dapF	0.479156
											AAP15955.1	ybaL	0.477618
											AAP16730.1	purU	0.476858
											AAP16193.1	ybcR	0.475495
											AAP16659.1	cds1110	0.475333
											AAP18424.1	yqjA	0.474937
											AAP18593.1	trkA	0.474451
											AAP18497.1	folP	0.474233
											AAP17661.1	cds2113	0.473959
											AAP17950.1	rnc	0.473905
											AAP16117.1	ybfE	0.473832
											AAP17008.1	ydiA	0.473428
											AAP16343.1	cds794	0.473013
											AAP15921.1	ybaV	0.471943
											AAP18026.1	proW	0.471154
											AAP18689.1	metH	0.469511
											AAP18572.1	prmA	0.469309
											AAP18143.1	recB	0.469274
											AAP17617.1	ccmE	0.468829
											AAP17000.1	btuC	0.468727
											AAP16102.1	ybgI	0.467531
											AAP15839.1	proA	0.466054
											AAP19313.1	gph	0.466002
											AAP16873.1	ydcG	0.46515
											AAP19164.1	yhjU	0.465101
											AAP19200.1	yhiR	0.464606
											AAP17925.1	purL	0.462772
											AAP16915.1	cds1366	0.46251
											AAP16429.1	kdsB	0.462425
											AAP17251.1	ruvB	0.462389
											AAP15659.1	acnB	0.462315
											AAP18691.1	aceA	0.460607
											AAP15948.1	ybaB	0.459398
											AAP18521.1	yhbG	0.459122
											AAP15987.1	cysS	0.459053
											AAP18352.1	plsC	0.45875
											AAP18308.1	glcG	0.458283
											AAP16435.1	mukB	0.457846
											AAP17765.1	ddg	0.457775
											AAP18086.1	cds2538	0.456794
											AAP17459.1	cds1908	0.45671
											AAP19611.1	yjjK	0.456621
											AAP18904.1	rho	0.456342
											AAP17975.1	cds2427	0.456036
											AAP18077.1	yclC	0.453512
											AAP16706.1	pth	0.452955
											AAP18387.1	ygiG	0.452459
											AAP18907.1	rhlB	0.452112
											AAP17883.1	cds2335	0.451668
											AAP19067.1	dfp	0.449923
											AAP17615.1	dsbE	0.449744
											AAP17726.1	usg	0.447865
											AAP16059.1	cds510	0.446678
											AAP17618.1	ccmD	0.445958
											AAP19512.1	frdC	0.445547
											AAP18502.1	dacB	0.445194
											AAP16948.1	ansA	0.444996
											AAP19497.1	aspA	0.444196
											AAP16648.1	cds1099	0.44397
											AAP18511.1	yrbB	0.443937
											AAP18591.1	fmt	0.443779
											AAP18115.1	cds2567	0.442817
											AAP16123.1	nagE	0.441179
											AAP19024.1	pstC	0.44042
											AAP16787.1	fabI	0.440046
											AAP18411.1	ygjQ	0.439603
											NP_858159.1	cds4076	0.439123
											AAP16775.1	cysB	0.438793
											AAP18637.1	yjcE	0.438366
											AAP18838.1	trkH	0.437654
											AAP18078.1	padI	0.436978
											AAP16072.1	ybgF	0.435847
											AAP16935.1	cds1386	0.435419
											AAP18228.1	cds2680	0.435325
											AAP17294.1	cds1743	0.434836
											AAP19274.1	glpE	0.434693
											AAP17886.1	cds2338	0.433968
											AAP18456.1	agaA	0.433649
											AAP18344.1	yghB	0.432501
											AAP17098.1	ydgB	0.432176
											AAP19311.1	dam	0.432099
											AAP19317.1	yhfX	0.431754
											AAP18890.1	aslB	0.431378
											AAP15596.1	surA	0.429127
											AAP19386.1	rpoA	0.428259
											AAP15673.1	yadD	-0.428677
											AAP18205.1	rpiA	-0.431574
											AAP16973.1	celA	-0.432383
											AAP17056.1	cds1507	-0.432668
											AAP18765.1	fpr	-0.433099
											AAP16077.1	tolQ	-0.433533
											AAP18045.1	srlD	-0.433734
											AAP16568.1	cds1020	-0.433832
											AAP16727.1	narH	-0.43398
											AAP18209.1	ygfG	-0.434029
											AAP16559.1	cds1011	-0.434171
											AAP17186.1	ydiB	-0.43418
											AAP18772.1	pfkA	-0.434211
											AAP15846.1	cds297	-0.434853
											AAP19150.1	yiaE	-0.435503
											AAP16723.1	narL	-0.435752
											AAP16283.1	ybiW	-0.436164
											AAP19116.1	aldB	-0.436433
											AAP16945.1	cds1396	-0.43663
											AAP19195.1	arsB	-0.437332
											AAP18459.1	agaC	-0.437673
											AAP17046.1	marA	-0.437756
											AAP18660.1	yjdA	-0.438011
											AAP16039.1	dsbG	-0.442197
											AAP16105.1	ybgA	-0.442212
											AAP15588.1	yaaU	-0.442526
											AAP18329.1	hybD	-0.442528
											AAP18683.1	sorB	-0.442687
											AAP15909.1	cds360	-0.442873
											NP_858382.1	cds4288	-0.44345
											AAP18953.1	cds3404	-0.443669
											AAP16437.1	ycbB	-0.444132
											AAP18371.1	ygiE	-0.444392
											AAP16338.1	aqpZ	-0.445528
											AAP19404.1	uxuA	-0.445692
											AAP18634.1	soxS	-0.446223
											AAP16636.1	pepT	-0.446224
											AAP16810.1	ycjP	-0.446282
											AAP19175.1	yhjH	-0.446386
											AAP17297.1	yecN	-0.447032
											AAP18654.1	cds3105	-0.447447
											AAP18516.1	yrbG	-0.447613
											AAP17049.1	ydeA	-0.447703
											AAP17057.1	cds1508	-0.448424
											AAP18107.1	eno	-0.448978
											AAP18919.1	yifE	-0.449784
											AAP15676.1	cds128	-0.449816
											AAP15908.2	cds359	-0.449932
											AAP18419.1	cds2870	-0.450051
											AAP16480.1	cds932	-0.450612
											AAP17742.1	cds2194	-0.451028
											AAP17938.1	cds2390	-0.451237
											AAP18298.1	yeeW	-0.451507
											AAP17943.1	cds2395	-0.451526
											AAP16875.1	ydcH	-0.451836
											AAP18043.1	srlE	-0.451935
											AAP16987.1	cds1438	-0.452199
											NP_858322.1	cds4233	-0.452856
											AAP18686.1	sorE	-0.453356
											AAP16454.1	ycbS	-0.453667
											AAP17657.1	glpB	-0.453672
											AAP17638.1	cds2091	-0.45465
											AAP17361.1	fliI	-0.455572
											AAP16795.1	cds1246	-0.455715
											AAP15873.1	phoR	-0.45705
											NP_858269.1	mxiG	-0.457433
											AAP18698.1	yjaI	-0.457656
											AAP15751.1	cds203	-0.457819
											AAP18920.1	yifA	-0.45799
											AAP19181.1	cds3632	-0.458889
											AAP17770.1	cds2222	-0.459074
											NP_858170.1	cds4085	-0.459156
											AAP16965.1	cds1416	-0.460036
											NP_858257.1	acp	-0.460825
											AAP15966.1	ybbK	-0.46113
											AAP18761.1	yiiU	-0.461819
											AAP18306.1	yghK	-0.462111
											AAP16508.1	torT	-0.462498
											AAP17013.1	ydiR	-0.46291
											AAP16573.1	yceO	-0.463337
											AAP16069.1	ybgR	-0.463761
											AAP16527.1	ycdC	-0.465454
											AAP15575.1	dapB	-0.465578
											AAP17968.1	yfiM	-0.465678
											NP_858161.2	cds4077	-0.466595
											AAP18417.1	uxaC	-0.466707
											AAP15862.1	yaiA	-0.467288
											AAP15817.1	yafH	-0.467591
											AAP16455.1	cds907	-0.468058
											AAP19244.1	rpoH	-0.468659
											AAP18193.1	bglA	-0.469562
											AAP15932.1	cds383	-0.469919
											AAP16275.1	ompX	-0.470198
											AAP16704.1	cds1155	-0.470215
											AAP15780.1	phoA	-0.470754
											AAP17179.1	cds1628	-0.470847
											AAP16521.1	cds973	-0.472514
											NP_858162.1	cds4079	-0.472874
											AAP17011.1	ydiT	-0.472983
											AAP17229.1	cds1678	-0.473199
											AAP18705.1	yjaE	-0.47325
											AAP18223.1	yggD	-0.473327
											AAP17942.1	cds2394	-0.473923
											AAP19119.1	cds3570	-0.474742
											AAP15773.1	cds225	-0.474883
											AAP17496.1	cds1945	-0.475349
											AAP17841.1	hyfC	-0.475801
											AAP16491.1	hyaE	-0.475925
											NP_858277.1	mxiE	-0.476333
											NP_858268.1	ipgF	-0.476354
											NP_858188.1	cds4101	-0.476592
											AAP17134.1	cds1585	-0.476633
											AAP17680.1	elaC	-0.478003
											NP_858251.1	cds4164	-0.478155
											AAP17790.1	ptsH	-0.479872
											AAP16395.1	ybhJ	-0.47991
											AAP17411.1	cds1860	-0.48008
											AAP16842.1	cds1293	-0.480392
											AAP15861.1	aroL	-0.480692
											AAP16388.1	cds840	-0.480778
											AAP17102.1	rstB	-0.481345
											AAP16362.1	ycaD	-0.48181
											AAP18552.1	yhcN	-0.482022
											AAP16913.1	cds1364	-0.482098
											AAP16266.1	ybiX	-0.482178
											AAP18645.1	nrfE	-0.482474
											AAP19331.1	nirB	-0.483306
											AAP17578.1	yeiE	-0.483465
											AAP16124.1	nagB	-0.483596
											AAP18253.1	cds2705	-0.483629
											AAP17500.1	issfl4	-0.484004
											AAP18309.1	glcC	-0.484328
											AAP15976.1	gcl	-0.48436
											AAP18333.1	cds2785	-0.484396
											NP_858209.1	cds4123	-0.484551
											AAP16587.1	flgA	-0.485217
											AAP18323.1	pitB	-0.486043
											AAP19423.1	cds3873	-0.486075
											AAP16826.1	cds1277	-0.487352
											AAP17346.1	fliD	-0.487624
											AAP18831.1	yihF	-0.487699
											AAP16049.1	citF	-0.488189
											AAP17829.1	yffG	-0.488662
											AAP19416.1	fimB	-0.488828
											NP_858361.1	mob9	-0.489501
											AAP16930.1	cds1381	-0.490346
											AAP17067.1	cds1518	-0.490822
											AAP17101.1	cds1552	-0.492181
											AAP16581.1	rimJ	-0.492403
											AAP16684.1	dadA	-0.4925
											AAP16734.1	galU	-0.492796
											AAP17267.1	cds1716	-0.492956
											AAP18074.1	cds2526	-0.492975
											AAP18539.1	yhcK	-0.493459
											AAP17818.1	cds2270	-0.493845
											AAP17398.1	cds1847	-0.494609
											AAP16829.1	cds1280	-0.495863
											AAP16358.1	dmsA	-0.495974
											AAP15959.1	ybaP	-0.496062
											AAP15737.1	yafD	-0.496541
											AAP15725.1	cutF	-0.496579
											AAP16988.1	pfkB	-0.497146
											AAP18440.1	tdcD	-0.497423
											AAP15776.1	cds228	-0.498217
											AAP18101.1	cds2553	-0.498232
											AAP18785.1	rhaA	-0.498735
											AAP17421.1	nac	-0.500595
											AAP19272.1	cds3723	-0.500769
											AAP18452.1	agaV	-0.501228
											AAP19548.1	sgaB	-0.501798
											AAP18461.1	agaI	-0.502061
											AAP17621.1	ccmA	-0.502354
											AAP16862.1	acpD	-0.502797
											NP_858179.2	virF	-0.503842
											AAP18260.1	yggN	-0.505347
											AAP16177.1	cds628	-0.50576
											AAP19088.1	tdh	-0.506116
											AAP17329.1	yecI	-0.507175
											AAP17023.1	cds1474	-0.507634
											AAP17268.1	cds1717	-0.50784
											AAP17399.1	cds1848	-0.507971
											AAP16878.1	tehA	-0.508473
											AAP18208.1	ygfD	-0.508494
											AAP15777.1	cds229	-0.508772
											AAP17163.1	ydhU	-0.509167
											AAP17920.1	hmpA	-0.509618
											AAP17136.1	slyB	-0.509871
											AAP19006.1	yieF	-0.513107
											AAP19579.1	hpcR	-0.513166
											AAP16683.1	ycgB	-0.513432
											AAP19479.1	ytfG	-0.513475
											AAP17587.1	yeiC	-0.514095
											AAP17200.1	cds1649	-0.514482
											AAP19087.1	kbl	-0.514568
											AAP17431.1	cds1880	-0.514696
											AAP19458.1	nrdD	-0.515246
											AAP17612.1	yejO	-0.515658
											AAP16347.1	clpA	-0.51578
											AAP17709.1	yfcG	-0.516473
											AAP16112.1	kdpC	-0.51657
											AAP18483.1	mtr	-0.516759
											AAP18281.1	cds2733	-0.516769
											AAP18255.1	cds2707	-0.516823
											AAP19260.1	yhhW	-0.517249
											AAP19617.1	cds4067	-0.51728
											AAP15735.1	cds187	-0.517404
											AAP16773.1	yciN	-0.518435
											AAP16868.1	cds1319	-0.518829
											AAP19142.1	gadA	-0.518934
											NP_858302.2	cds4214	-0.520006
											AAP16200.1	cds651	-0.521243
											AAP15815.1	yafV	-0.521371
											AAP16481.1	cds933	-0.521487
											AAP16509.1	torR	-0.522245
											AAP18599.1	yjbE	-0.522264
											AAP16546.1	cds998	-0.525228
											AAP16449.1	ycbO	-0.52545
											AAP17363.1	fliL	-0.526547
											AAP17311.1	cds1760	-0.526585
											NP_858172.1	cds4087	-0.526899
											NP_858207.1	cds4121	-0.527426
											NP_858196.1	ospC2	-0.528711
											AAP18819.1	yihN	-0.529555
											NP_858327.1	stbB	-0.53051
											AAP16436.1	cds888	-0.530995
											NP_858344.1	cds4255	-0.53121
											AAP16176.1	cds627	-0.531303
											AAP18450.1	agaR	-0.531549
											AAP19559.1	cds4009	-0.531871
											AAP16386.1	cds838	-0.532295
											AAP17380.1	cds1829	-0.533172
											AAP16284.1	ybiY	-0.533708
											AAP18556.1	yhcR	-0.534408
											AAP17316.1	cheR	-0.534574
											NP_858231.1	cds4146	-0.535229
											AAP19203.1	uspA	-0.535614
											AAP15785.1	yaiW	-0.535614
											AAP19143.1	yhjA	-0.536179
											AAP18681.1	sorD	-0.536196
											AAP18441.1	tdcC	-0.536212
											AAP18232.1	cds2684	-0.537108
											AAP16750.1	cds1201	-0.537307
											AAP17670.1	cds2122	-0.538341
											AAP18650.1	yjcP	-0.539151
											AAP19218.1	cds3669	-0.539267
											AAP16725.1	narK	-0.540844
											AAP18291.1	cds2743	-0.541379
											AAP17622.1	napC	-0.541674
											AAP18588.1	smg	-0.541797
											AAP16944.1	cds1395	-0.542572
											AAP16966.1	cds1417	-0.543385
											AAP18708.1	thiF	-0.544395
											AAP17289.1	cds1738	-0.544532
											NP_858311.1	cds4222	-0.545746
											AAP15938.1	ybaJ	-0.546097
											AAP19324.1	yhfQ	-0.546714
											NP_858252.2	cds4165	-0.548314
											AAP19413.1	fimA	-0.54885
											AAP19613.1	cds4063	-0.549434
											AAP16726.1	narG	-0.549675
											AAP19046.1	cds3497	-0.551171
											NP_858187.1	ipaH2	-0.551661
											AAP18429.1	yqjG	-0.55195
											AAP18684.1	sorA	-0.552442
											NP_858266.1	ipgD	-0.553453
											AAP18293.1	cds2745	-0.554029
											AAP17012.1	ydiS	-0.554058
											AAP15639.1	lpxC	-0.554129
											AAP17479.1	cpsG	-0.554376
											NP_858367.1	cds4276	-0.55444
											AAP19019.1	bglF	-0.554642
											AAP19412.1	fimI	-0.556365
											AAP19447.1	yjgI	-0.556796
											NP_858255.2	ipaJ	-0.557031
											NP_858394.1	cds4300	-0.558237
											AAP16506.1	ymcE	-0.558238
											AAP16797.1	ycjC	-0.559475
											AAP15810.1	cds262	-0.559658
											AAP18100.1	ygcS	-0.559701
											AAP17320.1	cheA	-0.559729
											AAP17870.1	cds2322	-0.559981
											AAP16336.1	cds787	-0.560059
											AAP17222.1	cds1671	-0.560166
											AAP16846.1	ynaF	-0.560183
											AAP15830.1	prfH	-0.560734
											AAP18608.1	malK	-0.560735
											AAP16563.1	cds1015	-0.563939
											AAP16082.1	ybgG	-0.565484
											AAP16308.1	grxA	-0.568747
											AAP17413.1	cds1862	-0.569256
											AAP16282.1	cds733	-0.569386
											AAP16328.1	cds779	-0.569798
											AAP17323.1	flhC	-0.569975
											NP_858306.1	cds4217	-0.570013
											AAP19545.1	yjfQ	-0.570388
											AAP18254.1	cds2706	-0.57101
											AAP17891.1	ndk	-0.573506
											AAP15937.1	hha	-0.574354
											NP_858143.1	ospF	-0.574713
											AAP17426.1	cds1875	-0.574986
											NP_858383.2	traX	-0.57761
											AAP17066.1	cds1517	-0.578815
											AAP17230.1	cds1679	-0.578863
											AAP17629.1	eco	-0.579023
											AAP18565.1	yhdA	-0.57934
											AAP18973.1	yidK	-0.579422
											AAP16244.1	moaB	-0.580082
											AAP18065.1	hypE	-0.580495
											AAP17014.1	ydiQ	-0.580746
											AAP18033.1	ygaG	-0.581658
											AAP19395.1	yjiH	-0.581858
											AAP18280.1	cds2732	-0.582299
											AAP19060.1	yicG	-0.58278
											AAP19538.1	yjfM	-0.582782
											AAP18059.1	hycB	-0.582988
											AAP16955.1	cds1406	-0.583059
											AAP18812.1	yihT	-0.584168
											AAP15808.1	rhsG	-0.584221
											AAP17643.1	cds2096	-0.584417
											AAP17138.1	cds1589	-0.58486
											AAP16927.1	yeaO	-0.585513
											AAP17509.1	gatR	-0.586011
											AAP16367.1	cds819	-0.587458
											AAP17498.1	cds1947	-0.587548
											AAP19569.1	hpaC	-0.588292
											AAP16590.1	flgE	-0.590835
											AAP16696.1	cds1147	-0.593071
											AAP18181.1	ygfU	-0.593564
											AAP17357.1	cds1806	-0.593722
											AAP19170.1	yhjM	-0.593727
											AAP18241.1	sprT	-0.594552
											NP_858281.1	spa15	-0.595307
											AAP17257.1	cds1706	-0.59546
											NP_858313.2	cds4224	-0.596276
											AAP16421.1	ycaL	-0.599294
											AAP18119.1	syd	-0.600198
											AAP17702.1	cds2154	-0.600655
											AAP16728.1	narJ	-0.60095
											AAP19140.1	yhiW	-0.601147
											AAP17705.1	yfcC	-0.602169
											AAP17208.1	fdnH	-0.602817
											AAP18447.1	yhaE	-0.602945
											AAP17406.1	cds1855	-0.603146
											AAP17059.1	cds1510	-0.603537
											AAP16783.1	osmB	-0.603665
											AAP17810.1	cds2262	-0.604168
											AAP16070.1	pnuC	-0.604329
											AAP16565.1	cds1017	-0.604433
											AAP17139.1	cds1590	-0.604823
											AAP16675.1	ycgL	-0.60484
											AAP18302.1	cds2754	-0.605105
											AAP16526.1	cds978	-0.605823
											AAP16753.1	tonB	-0.606232
											AAP17501.1	yegO	-0.606295
											AAP16591.1	flgG	-0.606674
											AAP17090.1	cds1541	-0.606871
											AAP17569.1	cds2022	-0.606975
											AAP15962.1	ybaS	-0.60702
											AAP18813.1	yihS	-0.607345
											AAP18460.1	agaD	-0.608639
											AAP19219.1	yhiJ	-0.608732
											AAP19449.1	yjgG	-0.609713
											NP_858364.1	cds4273	-0.611267
											AAP18358.1	cds2810	-0.611614
											AAP18810.1	yihV	-0.612348
											AAP18213.1	yggB	-0.613885
											AAP18709.1	thiG	-0.613983
											AAP18959.1	yicO	-0.615144
											AAP18465.1	cds2916	-0.616592
											AAP18728.1	yijC	-0.61681
											AAP18481.1	yhbV	-0.617041
											AAP17137.1	slyA	-0.617158
											AAP16983.1	cds1434	-0.618209
											AAP19405.1	gntP	-0.618427
											AAP17184.1	cds1633	-0.620551
											NP_858307.1	cds4218	-0.622446
											AAP17239.1	yebF	-0.622948
											AAP18528.1	yhbL	-0.623519
											AAP16475.1	cds927	-0.623947
											AAP16886.1	cds1337	-0.623984
											AAP17749.1	yfdC	-0.624238
											AAP16978.1	ydjC	-0.624706
											AAP18680.1	sorC	-0.625733
											AAP16582.1	yceH	-0.625807
											NP_858284.1	spa32	-0.627148
											AAP15692.1	yadR	-0.627733
											AAP18153.1	mutH	-0.627985
											NP_858305.1	cds4216	-0.628025
											AAP15749.1	sat1	-0.628207
											AAP15748.1	cds200	-0.628533
											AAP19189.1	yhiF	-0.62882
											AAP18432.1	yhaK	-0.629301
											AAP16448.1	ycbN	-0.630571
											NP_858229.2	cds4145	-0.630692
											AAP19502.1	yjeI	-0.631493
											AAP19000.1	tnaA	-0.632733
											AAP15977.1	gip	-0.632986
											AAP18313.1	cds2765	-0.633043
											AAP18651.1	yjcQ	-0.633426
											AAP17309.1	cds1758	-0.633894
											AAP16487.1	hyaA	-0.634203
											AAP19455.1	treR	-0.634594
											AAP19614.1	cds4064	-0.636083
											NP_858165.1	parB	-0.636447
											AAP18212.1	yggA	-0.636575
											NP_858208.1	cds4122	-0.636943
											AAP17654.1	glpQ	-0.637217
											AAP19155.1	yhjY	-0.63722
											AAP18170.1	cds2622	-0.637434
											AAP19406.1	fimH	-0.638496
											AAP17366.1	fliO	-0.638962
											AAP19133.1	yiaA	-0.639722
											AAP18799.1	yiiF	-0.639744
											AAP15745.1	cds197	-0.640293
											NP_858160.2	cds4078	-0.640737
											AAP19129.1	xylG	-0.640804
											AAP17331.1	cds1780	-0.6414
											AAP17322.1	motA	-0.643076
											AAP17508.1	cds1957	-0.643382
											AAP17157.1	cfa	-0.6472
											AAP18627.1	yjbQ	-0.647242
											AAP17767.1	cds2219	-0.647711
											AAP19503.1	yjeJ	-0.648014
											AAP16979.1	katE	-0.649049
											AAP17964.1	trxC	-0.649381
											AAP17233.1	cds1682	-0.64974
											AAP18982.1	yidS	-0.651476
											AAP17979.1	pheL	-0.653092
											AAP17223.1	cds1672	-0.653551
											AAP17408.1	cds1857	-0.654235
											AAP19483.1	ytfB	-0.654672
											AAP19208.1	cds3659	-0.654771
											AAP18774.1	cds3225	-0.655797
											AAP17892.1	cds2344	-0.656656
											AAP15851.1	cds302	-0.656693
											AAP18312.1	cds2764	-0.657445
											AAP19191.1	cds3642	-0.657492
											AAP18984.1	dgoK	-0.658096
											AAP18294.1	yeeS	-0.658317
											NP_858197.1	cds4111	-0.658334
											AAP15585.1	fixA	-0.65865
											AAP16438.1	ycbK	-0.660016
											AAP16140.1	ybeU	-0.660523
											AAP18783.1	rhaS	-0.660817
											AAP18451.1	agaZ	-0.661179
											AAP19543.1	yjfO	-0.661694
											AAP17435.1	cds1884	-0.662278
											AAP17215.1	narU	-0.662369
											AAP16096.1	ybgQ	-0.663114
											NP_858253.1	cds4166	-0.663217
											AAP17118.1	cds1569	-0.664633
											AAP16460.1	ycbW	-0.66496
											AAP16111.1	kdpA	-0.665546
											AAP17161.1	cds1610	-0.665925
											AAP19049.1	cds3500	-0.666363
											NP_858210.1	cds4124	-0.66653
											AAP16106.1	cds557	-0.666933
											AAP17285.1	cds1734	-0.667773
											AAP18335.1	cds2787	-0.668336
											AAP16564.1	cds1016	-0.669432
											AAP18656.1	phnD	-0.669829
											AAP17409.1	cds1858	-0.672525
											AAP18628.1	yjbR	-0.673413
											NP_858343.1	cds4254	-0.674231
											AAP19509.1	blc	-0.674454
											AAP15790.1	is600a	-0.67588
											AAP18615.1	lexA	-0.676662
											AAP17075.1	cds1526	-0.67667
											AAP15924.1	cof	-0.676946
											AAP17288.1	cds1737	-0.67758
											NP_858304.1	cds4215	-0.67772
											AAP16578.1	yceB	-0.678325
											AAP15831.1	pepD	-0.679828
											AAP18014.1	cds2466	-0.679875
											AAP17074.1	cds1525	-0.679949
											AAP16555.1	cds1007	-0.679998
											AAP15906.1	cyoC	-0.680958
											AAP15722.1	yaeO	-0.681748
											NP_858391.1	repB	-0.682046
											AAP18707.1	thiE	-0.682133
											AAP17817.1	cds2269	-0.682407
											AAP15905.1	cyoD	-0.682457
											AAP18342.1	cds2794	-0.686169
											AAP18682.1	sorF	-0.687838
											AAP16450.1	ycbP	-0.688681
											AAP15865.1	cds316	-0.688976
											AAP19508.1	sugE	-0.689177
											AAP17308.1	flhB	-0.689969
											AAP15781.1	yaiB	-0.690405
											NP_858279.1	mxiC	-0.690875
											AAP16052.1	citC	-0.691404
											NP_858371.1	msbB2	-0.692492
											AAP17538.1	yehR	-0.693573
											NP_858312.1	cds4223	-0.693864
											AAP16345.1	cspD	-0.694033
											AAP16931.1	yeaK	-0.694826
											AAP16333.1	cds784	-0.694831
											NP_858360.1	ospG	-0.695024
											AAP18606.1	malF	-0.69523
											NP_858272.1	mxiJ	-0.695415
											AAP18554.1	yhcP	-0.696959
											AAP16360.1	dmsC	-0.698889
											AAP19448.1	yjgH	-0.700954
											AAP16522.1	cds974	-0.701974
											AAP18782.1	rhaR	-0.701993
											AAP19204.1	yhiO	-0.702173
											AAP17432.1	cds1881	-0.702732
											AAP17290.1	cds1739	-0.704354
											AAP16012.1	ybdK	-0.704769
											AAP17015.1	cds1466	-0.705052
											AAP17024.1	cds1475	-0.706126
											NP_858321.1	cds4232	-0.707428
											AAP17265.1	cds1714	-0.707688
											AAP17300.1	bisZ	-0.708558
											AAP18710.1	thiH	-0.708606
											NP_858334.1	cds4245	-0.709464
											AAP16107.1	rhsE	-0.71259
											AAP16639.1	cds1090	-0.712712
											AAP15910.1	cds361	-0.713405
											AAP17071.1	cds1522	-0.713833
											AAP16530.1	cds982	-0.714942
											AAP16554.1	cds1006	-0.715018
											AAP18638.1	yjcF	-0.71595
											AAP18480.1	yhbU	-0.717689
											AAP18670.1	melA	-0.717802
											NP_858167.2	cds4083	-0.717912
											AAP18341.1	exbB	-0.718785
											NP_858375.1	cds4282	-0.719762
											NP_858387.1	cds4293	-0.721416
											AAP18258.1	yggM	-0.721935
											AAP18282.1	cds2734	-0.723329
											AAP16749.1	kch	-0.724542
											AAP19014.1	yieL	-0.726016
											AAP15973.1	ybbS	-0.729519
											AAP19484.1	ytfA	-0.729733
											NP_858218.1	cds4132	-0.730795
											AAP16166.1	dcuC	-0.731679
											AAP16387.1	cds839	-0.731736
											AAP18594.1	cds3045	-0.732028
											AAP17653.1	yfaH	-0.733317
											AAP17396.1	cds1845	-0.733905
											AAP17669.1	cds2121	-0.734766
											AAP16975.1	cds1426	-0.735406
											AAP17318.1	tar	-0.73719
											AAP16391.1	ipaH_2	-0.737805
											YP_145811.1	cds4107	-0.73863
											AAP19167.1	yhjR	-0.741341
											NP_858345.1	cds4256	-0.741406
											AAP17088.1	ynfL	-0.741963
											AAP17826.1	tktB	-0.742013
											AAP18295.1	yeeT	-0.746182
											AAP19553.1	yjfY	-0.747154
											AAP19179.1	yhjC	-0.74751
											AAP17568.1	sanA	-0.747713
											AAP17869.1	cds2321	-0.748182
											AAP15801.1	ykgH	-0.749242
											NP_858319.1	cds4230	-0.749932
											AAP16699.1	treA	-0.750338
											AAP16885.1	cds1336	-0.75037
											AAP18075.1	cds2527	-0.751107
											AAP18091.1	iap	-0.751233
											NP_858376.1	traD	-0.752158
											AAP16016.1	cds467	-0.752515
											AAP16377.1	cds829	-0.75267
											AAP18666.1	yjdE	-0.754215
											AAP18662.1	proP	-0.756436
											AAP17034.1	ydfI	-0.756883
											AAP16378.1	cds830	-0.757385
											AAP17801.1	yfeT	-0.758166
											AAP19619.1	cds4069	-0.75836
											AAP17353.1	cds1802	-0.759806
											NP_858138.1	ospC4	-0.760462
											AAP16253.1	ybhQ	-0.760502
											AAP15603.1	araA	-0.760528
											AAP15556.1	yaaH	-0.760602
											AAP18555.1	yhcQ	-0.761296
											AAP16651.1	cds1102	-0.76459
											AAP16000.1	ylcC	-0.765769
											NP_858320.1	cds4231	-0.766654
											AAP18553.1	yhcO	-0.767449
											AAP18652.1	yjcR	-0.767691
											AAP16544.1	cds996	-0.767752
											AAP15648.1	cds100	-0.769525
											AAP18214.1	fba	-0.770542
											AAP19210.1	cds3661	-0.771142
											AAP16296.1	yliJ	-0.771284
											AAP17207.1	fdnI	-0.772296
											AAP17631.1	alkB	-0.774519
											AAP16798.1	aldH	-0.776196
											AAP17913.1	yphA	-0.776226
											NP_858254.1	cds4167	-0.777294
											AAP17344.1	fliZ	-0.777615
											AAP16922.1	cds1373	-0.779145
											AAP18596.1	cds3047	-0.779334
											AAP19209.1	cds3660	-0.779593
											AAP16838.1	cds1289	-0.779712
											AAP17429.1	yeeX	-0.780008
											AAP16619.1	ndh	-0.780741
											AAP16510.1	torC	-0.781629
											AAP16159.1	ybeF	-0.782099
											AAP17307.1	flhE	-0.783176
											NP_858180.1	cds4095	-0.78443
											AAP18287.1	sap	-0.784788
											AAP19122.1	yiaK	-0.784834
											NP_858293.1	cds4206	-0.785425
											AAP19326.1	yhfN	-0.785696
											AAP18230.1	yggG	-0.787215
											AAP18622.1	qor	-0.787484
											AAP18080.1	nlpD	-0.78763
											AAP15884.1	yajI	-0.788241
											AAP15914.1	bolA	-0.788355
											AAP17042.1	cds1493	-0.789382
											AAP19132.1	yiaB	-0.795339
											AAP17567.1	cdd	-0.795962
											AAP17089.1	asr	-0.796365
											AAP19139.1	cds3590	-0.797608
											AAP19111.1	yibH	-0.797937
											AAP15764.1	cds216	-0.798411
											AAP17039.1	ydeJ	-0.798553
											AAP18211.1	yggE	-0.799731
											AAP18667.1	adiY	-0.79983
											AAP16029.1	entB	-0.800053
											AAP19228.1	nikB	-0.800131
											NP_858174.1	cds4089	-0.800605
											AAP18390.1	ttdA	-0.80184
											AAP17211.1	cds1660	-0.802511
											AAP19542.1	yjfN	-0.803728
											AAP17499.1	cds1948	-0.804335
											AAP18975.1	glvB	-0.805459
											AAP16015.1	cds466	-0.806512
											AAP17048.1	ydeB	-0.806655
											AAP16825.1	ycjZ	-0.807725
											NP_858366.1	cds4275	-0.807905
											AAP16799.1	ordL	-0.808309
											AAP19408.1	fimF	-0.808541
											NP_858365.1	cds4274	-0.808782
											AAP17359.1	fliG	-0.810139
											NP_858328.1	stbA	-0.810564
											AAP16400.1	cds852	-0.810929
											AAP18597.1	lysC	-0.811407
											AAP18016.1	cds2468	-0.811881
											NP_858219.1	cds4133	-0.813191
											AAP16473.1	cds925	-0.814269
											AAP18018.1	stpA	-0.815111
											AAP15768.1	cds220	-0.815212
											AAP18006.1	cds2458	-0.816145
											NP_858173.1	cds4088	-0.817242
											AAP17416.1	cds1865	-0.81828
											AAP16531.1	ycdO	-0.818983
											AAP18049.1	ygaA	-0.82061
											AAP18865.1	yigI	-0.820805
											AAP16887.1	cds1338	-0.821601
											AAP17899.1	yfhF	-0.822546
											NP_858336.1	cds4247	-0.823782
											NP_858189.1	cds4102	-0.823835
											AAP17077.1	cds1528	-0.823941
											AAP18192.1	cds2644	-0.827545
											AAP17043.1	ydeF	-0.829557
											AAP17266.1	cds1715	-0.830589
											AAP16221.1	cds672	-0.832047
											AAP17917.1	yphE	-0.832507
											AAP15771.1	cds223	-0.832889
											AAP17485.1	wcaF	-0.832984
											AAP16557.1	cds1009	-0.832988
											AAP16300.1	ybjG	-0.834339
											AAP16589.1	flgD	-0.834777
											AAP15823.1	fhiA	-0.837207
											AAP15770.1	cds222	-0.839793
											NP_858212.1	ipaH4	-0.840131
											NP_858240.1	cds4153	-0.841195
											AAP16375.1	cds827	-0.841378
											AAP17427.1	is629a	-0.841536
											AAP16823.1	cds1274	-0.84227
											AAP16532.1	ycdB	-0.843117
											AAP15900.1	cds351	-0.848142
											AAP17217.1	cds1666	-0.848742
											AAP15822.1	yafM	-0.849076
											AAP16562.1	cds1014	-0.849706
											AAP16859.1	cds1310	-0.851244
											AAP18311.1	cds2763	-0.852672
											AAP16327.1	cds778	-0.853803
											AAP17827.1	cds2279	-0.854552
											AAP15747.1	safC	-0.855771
											AAP17328.1	araG	-0.856486
											AAP18632.1	cds3083	-0.857988
											AAP15605.1	araC	-0.858131
											AAP16523.1	cds975	-0.858819
											AAP18010.1	gabP	-0.85926
											AAP16839.1	cds1290	-0.860561
											NP_858388.1	cds4294	-0.861327
											NP_858400.1	cds4307	-0.861339
											AAP18578.1	yhdW	-0.861705
											AAP18655.1	phnE	-0.865466
											AAP16342.1	ybjX	-0.866256
											AAP15903.1	cds354	-0.868323
											AAP16047.1	citG	-0.869019
											AAP16560.1	cds1012	-0.869623
											AAP15647.1	guaC	-0.872753
											AAP16162.1	ybeM	-0.877643
											AAP18605.1	malG	-0.879517
											AAP17940.1	cds2392	-0.879843
											AAP19041.1	cds3492	-0.879858
											AAP17577.1	lysP	-0.880067
											AAP16525.1	cds977	-0.880801
											AAP17820.1	cds2272	-0.881644
											AAP19043.1	cds3494	-0.881892
											AAP19169.1	yhjN	-0.882757
											AAP18727.1	yijD	-0.884767
											NP_858389.1	cds4295	-0.885779
											AAP16676.1	cds1127	-0.886969
											AAP16942.1	cds1393	-0.887015
											AAP17209.1	fdnG	-0.887881
											AAP16097.1	ybgP	-0.888356
											AAP16545.1	csgC	-0.888444
											NP_858316.1	cds4227	-0.889458
											AAP16142.1	ybeS	-0.889904
											AAP15850.1	cds301	-0.890177
											AAP17358.1	fliE	-0.890825
											AAP16390.1	cds842	-0.891831
											AAP19602.1	cds4052	-0.893429
											NP_858166.2	cds4084	-0.894052
											AAP19443.1	cds3893	-0.894403
											AAP16141.1	ybeT	-0.894864
											AAP15744.1	safA	-0.897871
											AAP19411.1	fimC	-0.898247
											AAP16165.1	crcA	-0.898742
											AAP17100.1	rstA	-0.900044
											AAP17769.1	cds2221	-0.900997
											AAP16623.1	ycfS	-0.903631
											AAP16626.1	ycfT	-0.903876
											AAP16071.1	nadA	-0.904142
											AAP19466.1	ytfR	-0.904218
											NP_858233.1	cds4148	-0.905529
											AAP17140.1	sodC	-0.907224
											AAP17658.1	glpC	-0.907595
											AAP17831.1	yffB	-0.908023
											AAP17681.1	cds2133	-0.908547
											AAP16249.1	ybhM	-0.909824
											AAP18658.1	phnB	-0.918451
											NP_858232.1	cds4147	-0.918563
											AAP18128.1	fucP	-0.918657
											AAP17356.1	ybcL	-0.92018
											AAP17944.1	cds2396	-0.922156
											AAP16720.1	chaC	-0.92593
											AAP16977.1	celF	-0.928185
											AAP18011.1	ygaE	-0.928344
											AAP18278.1	cds2730	-0.928618
											AAP17811.1	cds2263	-0.928925
											AAP18060.1	hycA	-0.928961
											AAP18980.1	yidQ	-0.929168
											AAP16685.1	dadX	-0.931727
											AAP18012.1	ygaU	-0.932988
											AAP17191.1	yddB	-0.935169
											AAP17525.1	yehB	-0.937729
											AAP18017.1	ygaP	-0.937991
											AAP19454.1	mgtA	-0.938152
											AAP17345.1	fliC	-0.941323
											AAP18815.1	yihQ	-0.942634
											AAP19489.1	cds3939	-0.943935
											AAP17977.1	cds2429	-0.946844
											AAP17739.1	cds2191	-0.947109
											AAP17763.1	cds2215	-0.948445
											AAP16814.1	ycjU	-0.95079
											AAP17026.1	rem	-0.952536
											AAP19407.1	fimG	-0.952901
											AAP18610.1	malM	-0.953054
											AAP17109.1	uidA	-0.954468
											AAP17381.1	cds1830	-0.954607
											AAP18448.1	yhaU	-0.957283
											AAP17397.1	cds1846	-0.958187
											AAP17821.1	cds2273	-0.958612
											AAP16858.1	cds1309	-0.961096
											AAP18219.1	cds2671	-0.96422
											AAP18051.1	ygbD	-0.964321
											AAP17825.1	talA	-0.964838
											AAP16409.1	cds861	-0.965152
											AAP18217.1	cds2669	-0.966218
											AAP17142.1	cds1593	-0.968307
											AAP19134.1	yiaH	-0.970466
											NP_858372.1	cds4281	-0.970883
											NP_858220.1	cds4134	-0.971168
											AAP16918.1	cds1369	-0.971654
											AAP15825.1	dinP	-0.972089
											AAP15774.1	cds226	-0.976054
											AAP19141.1	yhiX	-0.977006
											AAP15828.1	yafP	-0.98013
											AAP16373.1	cds825	-0.980859
											AAP18657.1	phnC	-0.981673
											AAP17517.1	gatY	-0.982822
											AAP16143.1	ybeR	-0.983297
											AAP16250.1	ybhN	-0.984019
											AAP16664.1	cds1115	-0.984578
											AAP15617.1	leuO	-0.990292
											AAP16031.1	ybdB	-0.990626
											AAP15604.1	araB	-0.991073
											AAP16932.1	cds1383	-0.99366
											AAP18442.1	tdcB	-0.994766
											NP_858137.1	phoN2	-0.995456
											NP_858190.1	cds4103	-0.997175
											AAP17939.1	cds2391	-0.999002
											AAP17306.1	cds1755	-0.9994
											AAP17205.1	adhP	-0.999473
											NP_858329.1	yccB	-1.00424
											NP_858397.1	cds4303	-1.00468
											AAP19194.1	arsR	-1.00704
											AAP17190.1	cds1639	-1.00728
											AAP18155.1	cds2607	-1.00882
											AAP18221.1	cds2673	-1.00951
											AAP19211.1	cds3662	-1.01007
											AAP18338.1	yghA	-1.01222
											AAP17108.1	uidC	-1.01477
											AAP17516.1	gatZ	-1.01929
											AAP17814.1	cds2266	-1.02086
											AAP18407.1	ygjM	-1.02165
											NP_858355.1	cds4266	-1.02292
											AAP15872.1	phoB	-1.02312
											AAP19110.1	yibI	-1.02385
											AAP18020.1	ygaC	-1.02623
											AAP19037.1	cds3488	-1.02718
											AAP19131.1	xylB	-1.02956
											AAP17355.1	cds1804	-1.02962
											AAP17369.1	rcsA	-1.02998
											AAP19618.1	cds4068	-1.03147
											AAP16972.1	osmE	-1.03276
											NP_858213.1	cds4127	-1.03446
											AAP16517.1	yccJ	-1.03574
											AAP17302.1	cutC	-1.0393
											AAP15824.1	mbhA	-1.03978
											AAP19223.1	cds3674	-1.04109
											AAP16507.1	yccM	-1.04355
											AAP17900.1	cds2352	-1.04782
											AAP18290.1	cds2742	-1.04976
											AAP16857.1	cds1308	-1.05336
											AAP15827.1	yafO	-1.05541
											AAP15816.1	ykfE	-1.05871
											AAP19212.1	cds3663	-1.05943
											AAP17764.1	cds2216	-1.06665
											AAP16739.1	ychE	-1.0693
											AAP19130.1	xylF	-1.07019
											AAP16424.1	himD	-1.07265
											AAP17515.1	gatA	-1.07623
											AAP18013.1	cds2465	-1.07638
											AAP18218.1	cds2670	-1.07701
											AAP17377.1	cds1826	-1.07826
											AAP18130.1	fucU	-1.07844
											NP_858370.1	virK	-1.07961
											AAP16268.1	ybiM	-1.0818
											AAP18801.1	cds3252	-1.0839
											NP_858356.1	cds4267	-1.08504
											AAP17766.1	cds2218	-1.08513
											NP_858333.2	cds4244	-1.08685
											AAP18299.1	cds2751	-1.08965
											AAP18391.1	ttdB	-1.09314
											AAP16815.1	ycjV	-1.09356
											AAP16359.1	dmsB	-1.09402
											AAP16620.1	ycfJ	-1.09641
											AAP18523.1	yhbH	-1.09796
											AAP19107.1	mtlR	-1.09913
											AAP16043.1	ybdR	-1.10299
											AAP16719.1	chaB	-1.10315
											AAP16740.1	cds1191	-1.1041
											AAP19045.1	cds3496	-1.10604
											AAP18171.1	cds2623	-1.10734
											AAP17678.1	elaB	-1.10819
											AAP17486.1	cds1935	-1.11312
											AAP18015.1	cds2467	-1.11314
											AAP16368.1	cds820	-1.11624
											NP_858230.2	cds4144	-1.11912
											AAP19417.1	yjhA	-1.12082
											AAP17562.1	yohC	-1.12386
											AAP18172.1	cds2624	-1.1247
											AAP19402.1	uxuR	-1.12504
											AAP16376.1	cds828	-1.12553
											AAP16809.1	ycjO	-1.12661
											AAP18617.1	yjbJ	-1.12707
											AAP17382.1	cds1831	-1.13872
											AAP17901.1	yfhO	-1.14196
											NP_858292.1	cds4205	-1.14507
											AAP16518.1	wrbA	-1.14673
											AAP16236.1	bioA	-1.15718
											NP_858358.3	ccdB	-1.15842
											AAP19418.1	yjhT	-1.16071
											AAP17955.1	rseA	-1.1618
											AAP16897.1	cds1348	-1.16383
											AAP17076.1	cds1527	-1.16403
											NP_858291.1	cds4204	-1.16491
											AAP16968.1	spy	-1.17066
											AAP17878.1	cds2330	-1.17905
											AAP19182.1	treF	-1.18744
											NP_858399.2	cds4306	-1.18951
											AAP17794.1	yfeK	-1.19037
											AAP16524.1	cds976	-1.19047
											AAP17877.1	cds2329	-1.19137
											AAP15826.1	yafN	-1.19174
											AAP18402.1	ebgC	-1.19288
											NP_858330.2	cds4241	-1.19378
											AAP16542.1	csgB	-1.19408
											NP_858369.1	rfbU	-1.19547
											NP_858393.2	repA	-1.19821
											AAP18019.1	cds2471	-1.20213
											AAP17029.1	relB	-1.20793
											AAP16030.1	entA	-1.20916
											AAP17078.1	cds1529	-1.21101
											NP_858228.1	cds4143	-1.21312
											AAP18220.1	cds2672	-1.21314
											AAP18284.1	cds2736	-1.21565
											AAP18983.1	dgoT	-1.21737
											AAP17995.1	recN	-1.2207
											NP_858398.2	ipaH1	-1.22458
											AAP16394.1	ybhI	-1.2316
											AAP19256.1	yhhA	-1.23305
											AAP17367.1	fliQ	-1.23553
											AAP19001.1	tnaB	-1.23725
											AAP16933.1	yeaG	-1.24726
											AAP18633.1	yjcB	-1.24784
											AAP16896.1	cds1347	-1.25139
											AAP17513.1	gatC	-1.25291
											AAP18303.1	cds2755	-1.25309
											AAP15746.1	safB	-1.25501
											AAP17510.1	gatD	-1.27678
											NP_858314.2	virA	-1.27974
											AAP16369.1	cds821	-1.28359
											AAP17027.1	relF	-1.28388
											AAP17362.1	fliK	-1.29059
											AAP19415.1	fimE	-1.30321
											AAP18135.1	cds2587	-1.30501
											AAP15992.1	sfmC	-1.30563
											NP_858331.2	ycdA	-1.31118
											AAP19039.1	shiD	-1.32094
											NP_858227.1	ospC1	-1.32453
											AAP18283.1	cds2735	-1.32901
											AAP19044.1	shiC	-1.34524
											AAP16326.1	cds777	-1.35273
											NP_858241.1	cds4154	-1.36057
											AAP16697.1	cds1148	-1.37173
											AAP15857.1	cds308	-1.37599
											AAP16472.1	sulA	-1.384
											AAP16251.1	ybhO	-1.38614
											NP_858379.1	mvpT	-1.3923
											NP_858335.1	ycfA	-1.39427
											AAP16575.1	yceP	-1.39649
											AAP15813.1	rhs	-1.39821
											AAP18240.1	galP	-1.40454
											AAP17868.1	cds2320	-1.40567
											AAP18816.1	yihO	-1.40664
											AAP17028.1	relE	-1.40941
											AAP18464.1	yraI	-1.41589
											AAP19562.1	cds4012	-1.41614
											AAP18619.1	yjbM	-1.42337
											AAP18167.1	cds2619	-1.43165
											AAP16760.1	yciG	-1.44209
											AAP18039.1	oraA	-1.44406
											AAP16252.1	ybhP	-1.4464
											AAP16856.1	ydbD	-1.44721
											AAP17185.1	cds1634	-1.45404
											AAP17368.1	fliR	-1.45481
											AAP18403.1	ygjI	-1.45544
											AAP17876.1	repC	-1.46914
											AAP17234.1	holE	-1.49715
											AAP17956.1	rpoE	-1.50044
											AAP19015.1	yieC	-1.5092
											AAP15999.1	ylcB	-1.52393
											AAP17166.1	cds1615	-1.52764
											AAP16576.1	dinI	-1.56298
											AAP16515.1	yccE	-1.58155
											AAP17301.1	yecK	-1.61744
											AAP15991.1	sfmA	-1.63005
											AAP18285.1	cds2737	-1.68314
											AAP15829.1	cds280	-1.72815
											AAP18443.1	tdcA	-1.78466
											AAP17747.1	cds2199	-2.00154
											AAP17212.1	cds1661	-2.00977
											AAP16021.1	cds472	-3.79575
											AAP16365.1	cds816	0.703301
											AAP16365.1	cds817	0.543332

## Sheet: List of genes between β and δ 
Common between β and δ							Specific for β				Specific for δ
		Comparison β		Comparison δ
Total Genes	7							171				93
GeneID	GeneName	Log2 Fold change	P-value	Log2 Fold change	P-value		Gene ID	Gene Name	Log2 Fold change		Gene ID	Gene Name	log2 Fold change
AAP16393.1	ybhH	1.17708	5.93532e-06	0.426436	0.0653686		AAP18621.1	yjbO	1.36628		AAP16019.1	fes	0.648123
AAP18443.1	tdcA	0.84018	0.00157783	-0.40784	0.0979108		AAP18285.1	cds2737	1.31117		AAP19591.1	fhuF	0.644847
AAP18814.1	yihR	0.831585	0.000563655	0.429895	0.0293948		AAP16622.1	ycfR	1.28029		AAP19516.1	cds3966	0.621224
AAP17152.1	sodB	-0.922134	4.70538e-05	-0.463623	0.00126606		AAP17259.1	ipaH_4	1.22675		AAP17388.1	cds1837	0.590406
AAP17390.1	cds1839	-1.26108	9.16871e-08	0.66064	4.49051e-06		AAP17570.1	cds2023	1.21947		AAP16382.1	cds834	0.590174
AAP16504.1	cds956	-1.42173	2.93673e-08	-0.520767	0.000839475		YP_001449236.1	ospE2	1.18363		AAP19590.1	bglJ	0.576226
AAP16502.1	cspH	-1.44	1.83074e-09	-0.471377	0.00129012		AAP16805.1	pspD	1.14519		AAP17249.1	yebM	0.569256
							AAP16804.1	pspC	1.13809		AAP17248.1	yebL	0.553999
							AAP18217.1	cds2669	1.13306		AAP16026.1	ybdA	0.553065
							AAP18408.1	ygjN	1.12226		AAP18788.1	frvA	0.552457
							NP_858183.2	cds4097	1.10033		AAP19358.1	yheA	0.517197
							AAP17185.1	cds1634	1.09265		AAP18779.1	cds3230	0.514313
							AAP16803.1	pspB	1.08083		AAP19359.1	bfr	0.511975
							AAP18060.1	hycA	1.07504		AAP18746.1	frwC	0.508553
							AAP17747.1	cds2199	1.07391		AAP19259.1	yhhX	0.504927
							AAP19562.1	cds4012	1.0676		AAP16363.1	cds814	0.504641
							AAP15991.1	sfmA	1.06424		AAP17250.1	yebI	0.504254
							AAP16815.1	ycjV	1.05832		AAP15962.1	ybaS	0.503872
							AAP15857.1	cds308	1.0394		AAP16027.1	fepB	0.499684
							AAP16707.1	ychH	1.03679		AAP16902.1	cds1353	0.496202
							AAP17812.1	cds2264	1.0113		AAP16018.1	fepA	0.492409
							NP_858136.1	ospB	1.00727		AAP19588.1	cds4038	0.484683
							AAP16068.1	cds519	0.998893		AAP18281.1	cds2733	0.481707
							AAP17875.1	cds2327	0.989231		AAP17818.1	cds2270	0.478503
							AAP17258.1	cds1707	0.980018		AAP19030.1	iutA	0.475448
							AAP16802.1	pspA	0.979684		AAP17270.1	cds1719	0.468785
							YP_001449237.1	ospE1	0.966523		AAP18023.1	nrdE	0.465396
							AAP19110.1	yibI	0.941668		AAP17274.1	sitA	0.463583
							NP_858359.2	ipaH9	0.938244		AAP16674.1	cds1125	0.460857
							AAP19015.1	yieC	0.935788		AAP15974.1	ybbT	0.460444
							AAP17873.1	trbL	0.9281		AAP18340.1	exbD	0.450116
							AAP16806.1	pspE	0.924009		AAP18022.1	nrdI	0.449839
							AAP17874.1	trbJ	0.907228		AAP15686.1	fhuA	0.448513
							AAP17794.1	yfeK	0.883467		AAP18974.1	yidL	0.448341
							AAP17301.1	yecK	0.881478		AAP17325.1	cds1774	0.445029
							AAP16252.1	ybhP	0.879805		AAP19291.1	feoA	0.444304
							AAP16576.1	dinI	0.874036		AAP16474.1	cds926	0.444122
							AAP16326.1	cds777	0.867772		AAP16025.1	fepD	0.442731
							AAP17368.1	fliR	0.866461		AAP15688.1	fhuD	0.44154
							AAP17813.1	cds2265	0.866355		AAP16413.1	cds865	0.435939
							AAP17377.1	cds1826	0.866092		AAP19033.1	iucB	0.435779
							AAP15992.1	sfmC	0.860375		AAP18024.1	nrdF	0.429109
							NP_858330.2	cds4241	0.845335		AAP16210.1	cds661	0.4291
							AAP16665.1	cds1116	0.841232		AAP17389.1	cds1838	0.426136
							AAP16541.1	csgD	0.834909		AAP18160.1	lysA	0.425862
							AAP18719.1	tufB	-0.83147		AAP18745.1	frwB	0.424965
							AAP18898.1	rffH	-0.832127		AAP17531.1	metG	0.422864
							AAP18944.1	atpG	-0.836398		AAP18339.1	cds2791	0.422204
							AAP19262.1	gntK	-0.837522		AAP18021.1	nrdH	0.420117
							AAP17798.1	cysU	-0.838303		AAP17134.1	cds1585	0.417547
							AAP17806.1	cds2258	-0.83959		AAP17630.1	yojI	0.415913
							AAP19071.1	mutM	-0.844189		AAP19034.1	iucA	0.413019
							AAP15729.1	rcsF	-0.851619		AAP17247.1	yebA	0.412061
							AAP18750.1	metB	-0.852014		AAP17360.1	fliH	0.409936
							AAP17734.1	yfcA	-0.852531		AAP17080.1	cds1531	0.407345
							AAP18692.1	metA	-0.852593		AAP18321.1	yghS	0.405583
							AAP17378.1	cds1827	-0.859139		AAP19032.1	iucC	0.403296
							AAP19299.1	yrfH	-0.861755		AAP18341.1	exbB	0.399169
							AAP17720.1	cvpA	-0.875093		AAP19290.1	feoB	0.397274
							AAP15572.1	slpA	-0.880082		AAP17487.1	cds1936	0.397
							AAP16765.1	trpE	-0.882486		AAP18579.1	cds3030	0.395765
							AAP17691.1	nuoF	-0.882986		AAP15687.1	fhuC	0.387364
							AAP16203.1	cds654	-0.886943		AAP17507.1	cds1956	0.381733
							AAP15847.1	gtrII	-0.892246		AAP17067.1	cds1518	0.38165
							AAP18916.1	ilvM	-0.893786		AAP17411.1	cds1860	-0.381653
							AAP15855.1	cds306	-0.89475		AAP16095.1	ybgD	-0.38787
							AAP17424.1	cobS	-0.898113		NP_858403.1	cds4310	-0.392274
							AAP16063.1	galT	-0.899627		AAP15568.1	cds20	-0.394731
							AAP18966.1	ilvB	-0.900561		NP_858213.1	cds4127	-0.398417
							AAP15549.1	thrA	-0.916774		AAP15746.1	safB	-0.399532
							AAP18915.1	ilvE	-0.917028		AAP18463.1	cds2914	-0.410625
							AAP19083.1	waaI	-0.918049		AAP17410.1	cds1859	-0.412544
							AAP18027.1	proX	-0.918338		AAP18933.1	asnA	-0.426672
							AAP18946.1	atpC	-0.919192		AAP17668.1	cds2120	-0.432161
							AAP16084.1	farR	-0.920444		AAP18100.1	ygcS	-0.43236
							AAP17428.1	is629b	-0.928364		AAP16646.1	cds1097	-0.437233
							AAP19380.1	rplO	-0.929889		AAP19391.1	cds3842	-0.441402
							AAP18562.1	mreD	-0.932605		AAP17405.1	cds1854	-0.443064
							AAP16091.1	sdhA	-0.934192		AAP18253.1	cds2705	-0.449742
							AAP18757.1	hslV	-0.944957		AAP18391.1	ttdB	-0.454914
							AAP16746.1	oppF	-0.951622		AAP17362.1	fliK	-0.485504
							AAP15630.1	mraY	-0.95231		AAP18619.1	yjbM	-0.490156
							AAP17351.1	yedE	-0.953851		AAP17604.1	yejG	-0.490326
							AAP16764.1	trpD	-0.95395		AAP19146.1	cds3597	-0.502879
							AAP15550.1	thrB	-0.955856		AAP17406.1	cds1855	-0.5313
							AAP15804.1	ykgF	-0.956333		AAP15764.1	cds216	-0.549999
							AAP15622.1	cds74	-0.959659		AAP19197.1	cds3648	-0.553864
							AAP16323.1	artP	-0.959937		AAP18295.1	yeeT	-0.595265
							AAP16788.1	ycjD	-0.962573		AAP18283.1	cds2735	-0.607318
							AAP18978.1	ibpB	-0.963625		AAP16505.1	cspG	-0.677114
							AAP19501.1	mopA	-0.967147		AAP17166.1	cds1615	-0.688015
							AAP18885.1	hemD	-0.970546		AAP17332.1	ftn	-0.716563
							AAP16085.1	sucD	-0.984044		AAP15928.1	glnK	-0.734882
							AAP16086.1	sucC	-0.985158
							AAP16937.1	gapA	-0.987769
							AAP18914.1	ilvD	-0.990635
							AAP17693.1	nuoC	-0.991688
							AAP18758.1	hslU	-0.99943
							AAP18141.1	argA	-1.00208
							AAP16762.1	trpB	-1.00504
							AAP16763.1	trpC	-1.00849
							AAP19500.1	mopB	-1.01246
							AAP17715.1	hisQ	-1.01379
							AAP18979.1	ibpA	-1.01434
							AAP17690.1	nuoG	-1.02721
							AAP18094.1	cysJ	-1.02914
							AAP16226.1	cds677	-1.03354
							AAP17683.1	nuoN	-1.03602
							AAP17352.1	yedF	-1.03614
							AAP16090.1	sdhB	-1.04907
							AAP17692.1	nuoE	-1.05787
							AAP17241.1	eda	-1.05856
							AAP16743.1	oppB	-1.06082
							AAP16714.1	hemK	-1.06438
							AAP19162.1	dppF	-1.07756
							AAP15573.1	lytB	-1.07842
							AAP17009.1	ppsA	-1.07851
							AAP15551.1	thrC	-1.07901
							AAP19172.1	dctA	-1.07963
							AAP19576.1	hpaD	-1.08018
							AAP19298.1	yrfI	-1.08712
							AAP19249.1	livM	-1.08805
							AAP17572.1	mglA	-1.09841
							AAP18479.1	yhbT	-1.11285
							AAP17094.1	pntB	-1.12789
							AAP18585.1	aroE	-1.13032
							AAP19161.1	dppD	-1.13426
							AAP17685.1	nuoL	-1.13837
							AAP19160.1	dppC	-1.15375
							AAP17686.1	nuoK	-1.16411
							AAP17687.1	nuoJ	-1.16593
							AAP16745.1	oppD	-1.16686
							AAP16662.1	cds1113	-1.17642
							AAP18087.1	ygbE	-1.18932
							AAP18092.1	cysH	-1.19613
							NP_858194.1	cds4108	-1.19904
							AAP16934.1	yeaF	-1.2093
							AAP17689.1	nuoH	-1.21053
							AAP16744.1	oppC	-1.22133
							AAP17795.1	cysM	-1.22901
							AAP17105.1	fumA	-1.23036
							AAP19337.1	argD	-1.23089
							AAP16903.1	cds1354	-1.24125
							AAP15803.1	ykgG	-1.24626
							AAP17688.1	nuoI	-1.2532
							AAP17684.1	nuoM	-1.26089
							AAP19159.1	dppB	-1.28561
							AAP19578.1	hpaG	-1.2981
							AAP15577.1	carB	-1.32915
							AAP16982.1	cds1433	-1.33177
							AAP18737.1	argC	-1.33335
							AAP18945.1	atpD	-1.35442
							AAP18735.1	argH	-1.377
							AAP16320.1	artM	-1.39503
							AAP18748.1	metF	-1.40046
							AAP19577.1	hpaE	-1.41418
							AAP19147.1	cspA	-1.41448
							AAP18093.1	cysI	-1.44288
							AAP16319.1	artJ	-1.44837
							AAP16503.1	cds955	-1.45629
							AAP17714.1	hisM	-1.46861
							AAP18493.1	argG	-1.50087
							AAP16322.1	artI	-1.55785
							AAP17713.1	hisP	-1.56095
							AAP16321.1	artQ	-1.62657
							AAP19441.1	argI	-1.63994
							AAP16138.1	ybeK	-1.64409
							AAP18910.1	ppiC	-1.70506
							AAP18911.1	ilvC	-1.70707
							AAP18736.1	argB	-1.83773
							AAP18856.1	metE	-2.41044
